# Supplementary material for: Robo functions as an attractive cue for glial migration through SYG-1/Neph
Source: eLife. 2020 Nov 19;9:e57921. doi: 10.7554/eLife.57921 (PMC7676865; doi:10.7554/eLife.57921)
Supplement: Supplementary file 2. [file elife-57921-supp2.xlsx]

## Sheet: candidates only in sax-3 6h
#	Visible?	Starred?	Bio View:Identified Proteins (1323)<BR>Including 10 Decoys	Accession Number	Molecular Weight	Protein Grouping Ambiguity	INX3 6h	QC	sax3 0h	sax3 6h
	TRUE	Empty	Girdin homolog OS=Caenorhabditis elegans OX=6239 GN=grdn-1 PE=1 SV=1	F3Y5P4|GRDN_CAEEL	154 kDa		0		0	3
	TRUE	Empty	Tubulin polymerization-promoting protein homolog OS=Caenorhabditis elegans OX=6239 GN=tppp-1 PE=1 SV=1	P91127|TPPP_CAEEL	19 kDa		0		0	4
	TRUE	Empty	Neprilysin-1 OS=Caenorhabditis elegans OX=6239 GN=nep-1 PE=1 SV=3	Q18673|NEPL1_CAEEL	87 kDa		0		0	3
	TRUE	Empty	Endoplasmic reticulum junction formation protein lunapark-1 OS=Caenorhabditis elegans OX=6239 GN=lnp-1 PE=2 SV=2	Q17667|LNP1_CAEEL	39 kDa		0		0	2
	TRUE	Empty	Uncharacterized protein R09E10.5 OS=Caenorhabditis elegans OX=6239 GN=R09E10.5 PE=1 SV=2	Q21874|YF1M_CAEEL	163 kDa		0		0	2
	TRUE	Empty	Collagen alpha-2(IV) chain OS=Caenorhabditis elegans OX=6239 GN=let-2 PE=1 SV=2	P17140|CO4A2_CAEEL	168 kDa		0		0	2
	TRUE	Empty	Uncharacterized protein ZK1098.3 OS=Caenorhabditis elegans OX=6239 GN=ZK1098.3 PE=4 SV=2	P34603|YO63_CAEEL	92 kDa		0		0	2
	TRUE	Empty	Cuticle collagen 1 OS=Caenorhabditis elegans OX=6239 GN=sqt-3 PE=1 SV=2	P08124|COL1_CAEEL	29 kDa		0		0	2
	TRUE	Empty	Polypeptide N-acetylgalactosaminyltransferase 3 OS=Caenorhabditis elegans OX=6239 GN=gly-3 PE=2 SV=2	P34678|GALT3_CAEEL	69 kDa		0		0	3
	TRUE	Empty	High mobility group protein 1.2 OS=Caenorhabditis elegans OX=6239 GN=hmg-1.2 PE=1 SV=2	Q09390|HMG12_CAEEL	27 kDa		0		0	2
	TRUE	Empty	Queuine tRNA-ribosyltransferase accessory subunit 2 OS=Caenorhabditis elegans OX=6239 GN=tgt-2 PE=3 SV=1	Q9NEU3|QTRT2_CAEEL	42 kDa		0		0	2
	TRUE	Empty	Inositol monophosphatase ttx-7 OS=Caenorhabditis elegans OX=6239 GN=ttx-7 PE=1 SV=3	Q19420|IMPA1_CAEEL	31 kDa		0		0	2
	TRUE	Empty	Sterol 4-C-methyltransferase strm-1 OS=Caenorhabditis elegans OX=6239 GN=strm-1 PE=3 SV=2	Q9TYP1|STRM1_CAEEL	38 kDa		0		0	3
	TRUE	Empty	UPF0046 protein C25E10.12 OS=Caenorhabditis elegans OX=6239 GN=C25E10.12 PE=3 SV=1	Q18161|YBPT_CAEEL	32 kDa		0		0	2
	TRUE	Empty	Probable nuclear transport factor 2 OS=Caenorhabditis elegans OX=6239 GN=ran-4 PE=3 SV=1	Q21735|NTF2_CAEEL	15 kDa		0		0	2
	TRUE	Empty	Synaptogenesis protein syg-1 OS=Caenorhabditis elegans OX=6239 GN=syg-1 PE=1 SV=1	B1Q236|SYG1_CAEEL	81 kDa		0		0	2
	TRUE	Empty	Uncharacterized oxidoreductase dhs-27 OS=Caenorhabditis elegans OX=6239 GN=dhs-27 PE=3 SV=2	Q11177|DHS27_CAEEL	94 kDa		0		0	2
	TRUE	Empty	B7FAS6-DECOY	B7FAS6-DECOY	?		0		0	2
	TRUE	Empty	Glutathione peroxidase 1 OS=Caenorhabditis elegans OX=6239 GN=gpx-1 PE=3 SV=1	O02621|GPX1_CAEEL	18 kDa	TRUE	0		0	2
	TRUE	Empty	Probable V-type proton ATPase subunit G OS=Caenorhabditis elegans OX=6239 GN=vha-10 PE=3 SV=1	P91303|VATG_CAEEL	14 kDa		0		0	2
	TRUE	Empty	Innexin-5 OS=Caenorhabditis elegans OX=6239 GN=inx-5 PE=3 SV=2	Q23027|INX5_CAEEL	51 kDa		0		0	2
	TRUE	Empty	V-type proton ATPase 16 kDa proteolipid subunit 2 OS=Caenorhabditis elegans OX=6239 GN=vha-2 PE=2 SV=1	C0HLB3|VATL2_CAEEL (+1)	16 kDa		0		0	2

## Sheet: raw data
#	Visible?	Starred?	Bio View:Identified Proteins (1323)<BR>Including 10 Decoys	Accession Number	Molecular Weight	Protein Grouping Ambiguity	INX3 6h	QC	sax3 0h	sax3 6h
	TRUE	Empty	Vitellogenin-6 OS=Caenorhabditis elegans OX=6239 GN=vit-6 PE=1 SV=5	P18948|VIT6_CAEEL	193 kDa		352		1397	707
	TRUE	Empty	Vitellogenin-5 OS=Caenorhabditis elegans OX=6239 GN=vit-5 PE=2 SV=2	P06125|VIT5_CAEEL	186 kDa	TRUE	144		1343	651
	TRUE	Empty	Elongation factor 1-alpha OS=Caenorhabditis elegans OX=6239 GN=eft-3 PE=3 SV=1	P53013|EF1A_CAEEL	51 kDa		624	4	812	648
	TRUE	Empty	Vitellogenin-2 OS=Caenorhabditis elegans OX=6239 GN=vit-2 PE=1 SV=5	P05690|VIT2_CAEEL	188 kDa	TRUE	219		1123	531
	TRUE	Empty	Actin-4 OS=Caenorhabditis elegans OX=6239 GN=act-4 PE=3 SV=2	P10986|ACT4_CAEEL	42 kDa	TRUE	345	2	173	204
	TRUE	Empty	Elongation factor 2 OS=Caenorhabditis elegans OX=6239 GN=eef-2 PE=1 SV=4	P29691|EF2_CAEEL	95 kDa		190		282	211
	TRUE	Empty	Guanine nucleotide-binding protein subunit beta-2-like 1 OS=Caenorhabditis elegans OX=6239 GN=rack-1 PE=1 SV=3	Q21215|GBLP_CAEEL	36 kDa		205		322	220
	TRUE	Empty	Heat shock 70 kDa protein A OS=Caenorhabditis elegans OX=6239 GN=hsp-1 PE=1 SV=2	P09446|HSP7A_CAEEL	70 kDa	TRUE	149	39	268	184
	TRUE	Empty	Tubulin beta-2 chain OS=Caenorhabditis elegans OX=6239 GN=tbb-2 PE=1 SV=1	P52275|TBB2_CAEEL	50 kDa	TRUE	238		235	210
	TRUE	Empty	Heat shock protein 90 OS=Caenorhabditis elegans OX=6239 GN=daf-21 PE=1 SV=1	Q18688|HSP90_CAEEL	80 kDa	TRUE	167		263	174
	TRUE	Empty	Vitellogenin-3 OS=Caenorhabditis elegans OX=6239 GN=vit-3 PE=1 SV=1	Q9N4J2|VIT3_CAEEL	187 kDa	TRUE	24		314	122
	TRUE	Empty	ATP synthase subunit alpha, mitochondrial OS=Caenorhabditis elegans OX=6239 GN=atp-1 PE=1 SV=1	Q9XXK1|ATPA_CAEEL	58 kDa		137		152	146
	TRUE	Empty	Tubulin alpha-2 chain OS=Caenorhabditis elegans OX=6239 GN=tba-2 PE=1 SV=1	P34690|TBA2_CAEEL	50 kDa	TRUE	135		136	120
	TRUE	Empty	Heat shock 70 kDa protein F, mitochondrial OS=Caenorhabditis elegans OX=6239 GN=hsp-6 PE=1 SV=2	P11141|HSP7F_CAEEL	71 kDa	TRUE	106		146	125
	TRUE	Empty	Stress-induced protein 1 OS=Caenorhabditis elegans OX=6239 GN=sip-1 PE=1 SV=1	Q20363|SIP1_CAEEL	18 kDa		54		191	103
	TRUE	Empty	Vitellogenin-1 OS=Caenorhabditis elegans OX=6239 GN=vit-1 PE=1 SV=2	P55155|VIT1_CAEEL	188 kDa	TRUE	17		252	98
	TRUE	Empty	Dynein heavy chain, cytoplasmic OS=Caenorhabditis elegans OX=6239 GN=dhc-1 PE=1 SV=1	Q19020|DYHC_CAEEL	522 kDa		66		116	89
	TRUE	Empty	Probable clathrin heavy chain 1 OS=Caenorhabditis elegans OX=6239 GN=chc-1 PE=1 SV=1	P34574|CLH_CAEEL	192 kDa		90		114	99
	TRUE	Empty	Myosin-4 OS=Caenorhabditis elegans OX=6239 GN=unc-54 PE=1 SV=2	P02566|MYO4_CAEEL	225 kDa	TRUE	175		3	133
	TRUE	Empty	ATP synthase subunit beta, mitochondrial OS=Caenorhabditis elegans OX=6239 GN=atp-2 PE=1 SV=2	P46561|ATPB_CAEEL	58 kDa		90		114	97
	TRUE	Empty	40S ribosomal protein S3 OS=Caenorhabditis elegans OX=6239 GN=rps-3 PE=3 SV=1	P48152|RS3_CAEEL	27 kDa		87		108	91
	TRUE	Empty	Myosin-3 OS=Caenorhabditis elegans OX=6239 GN=myo-3 PE=2 SV=1	P12844|MYO3_CAEEL	226 kDa	TRUE	135		19	118
	TRUE	Empty	60S acidic ribosomal protein P0 OS=Caenorhabditis elegans OX=6239 GN=rla-0 PE=1 SV=3	Q93572|RLA0_CAEEL	34 kDa	TRUE	82		125	86
	TRUE	Empty	Transitional endoplasmic reticulum ATPase homolog 1 OS=Caenorhabditis elegans OX=6239 GN=cdc-48.1 PE=1 SV=1	P54811|TERA1_CAEEL	90 kDa	TRUE	78		98	86
	TRUE	Empty	Puromycin-sensitive aminopeptidase OS=Caenorhabditis elegans OX=6239 GN=pam-1 PE=1 SV=1	Q4TT88|PSA_CAEEL	107 kDa		76		89	87
	TRUE	Empty	60S ribosomal protein L3 OS=Caenorhabditis elegans OX=6239 GN=rpl-3 PE=2 SV=1	P50880|RL3_CAEEL	46 kDa		53		101	71
	TRUE	Empty	DNA topoisomerase 2 top-2 OS=Caenorhabditis elegans OX=6239 GN=top-2 PE=1 SV=2	Q23670|TOP2_CAEEL	172 kDa	TRUE	61		86	73
	TRUE	Empty	60S ribosomal protein L5 OS=Caenorhabditis elegans OX=6239 GN=rpl-5 PE=3 SV=1	P49405|RL5_CAEEL	33 kDa		76		84	75
	TRUE	Empty	Heat shock 70 kDa protein C OS=Caenorhabditis elegans OX=6239 GN=hsp-3 PE=1 SV=2	P27420|HSP7C_CAEEL	73 kDa	TRUE	91		63	77
	TRUE	Empty	Translationally-controlled tumor protein homolog OS=Caenorhabditis elegans OX=6239 GN=tct-1 PE=1 SV=1	Q93573|TCTP_CAEEL	21 kDa		82		81	82
	TRUE	Empty	Adenosylhomocysteinase OS=Caenorhabditis elegans OX=6239 GN=ahcy-1 PE=3 SV=1	P27604|SAHH_CAEEL	48 kDa		72	2	80	63
	TRUE	Empty	Eukaryotic initiation factor 4A OS=Caenorhabditis elegans OX=6239 GN=inf-1 PE=2 SV=1	P27639|IF4A_CAEEL	45 kDa		76		66	70
	TRUE	Empty	40S ribosomal protein S3a OS=Caenorhabditis elegans OX=6239 GN=rps-1 PE=3 SV=2	P48154|RS3A_CAEEL	29 kDa		63		72	63
	TRUE	Empty	T-complex protein 1 subunit zeta OS=Caenorhabditis elegans OX=6239 GN=cct-6 PE=1 SV=1	P46550|TCPZ_CAEEL	59 kDa		58		77	67
	TRUE	Empty	40S ribosomal protein S16 OS=Caenorhabditis elegans OX=6239 GN=rps-16 PE=1 SV=3	Q22054|RS16_CAEEL	16 kDa		70		67	58
	TRUE	Empty	Protein disulfide-isomerase 2 OS=Caenorhabditis elegans OX=6239 GN=pdi-2 PE=1 SV=1	Q17770|PDI2_CAEEL	55 kDa		67		43	68
	TRUE	Empty	Protein arginine N-methyltransferase 1 OS=Caenorhabditis elegans OX=6239 GN=prmt-1 PE=1 SV=1	Q9U2X0|ANM1_CAEEL	40 kDa		60	2	87	63
	TRUE	Empty	60S ribosomal protein L7 OS=Caenorhabditis elegans OX=6239 GN=rpl-7 PE=3 SV=1	O01802|RL7_CAEEL	28 kDa		54		69	59
	TRUE	Empty	60S ribosomal protein L4 OS=Caenorhabditis elegans OX=6239 GN=rpl-4 PE=1 SV=3	O02056|RL4_CAEEL	39 kDa		59		81	71
	TRUE	Empty	Probable malate dehydrogenase, mitochondrial OS=Caenorhabditis elegans OX=6239 GN=mdh-2 PE=3 SV=1	O02640|MDHM_CAEEL	35 kDa		60		70	62
	TRUE	Empty	60S ribosomal protein L8 OS=Caenorhabditis elegans OX=6239 GN=rpl-2 PE=3 SV=1	Q9XVF7|RL8_CAEEL	28 kDa		60		78	60
	TRUE	Empty	Pyruvate carboxylase 1 OS=Caenorhabditis elegans OX=6239 GN=pyc-1 PE=1 SV=1	O17732|PYC1_CAEEL	129 kDa		58		56	56
	TRUE	Empty	Leucine--tRNA ligase OS=Caenorhabditis elegans OX=6239 GN=lars-1 PE=3 SV=2	Q09996|SYLC_CAEEL	135 kDa		48		66	55
	TRUE	Empty	60S ribosomal protein L7a OS=Caenorhabditis elegans OX=6239 GN=rpl-7A PE=1 SV=3	Q966C6|RL7A_CAEEL	30 kDa		42		66	54
	TRUE	Empty	40S ribosomal protein SA OS=Caenorhabditis elegans OX=6239 GN=rps-0 PE=1 SV=3	P46769|RSSA_CAEEL	31 kDa		46		74	70
	TRUE	Empty	Valine--tRNA ligase OS=Caenorhabditis elegans OX=6239 GN=glp-4 PE=1 SV=1	Q9U1Q4|SYV_CAEEL	119 kDa		51		71	58
	TRUE	Empty	40S ribosomal protein S8 OS=Caenorhabditis elegans OX=6239 GN=rps-8 PE=3 SV=1	P48156|RS8_CAEEL	24 kDa		65		64	61
	TRUE	Empty	Probable ATP-citrate synthase OS=Caenorhabditis elegans OX=6239 GN=acly-1 PE=3 SV=1	P53585|ACLY_CAEEL	122 kDa		42		75	59
	TRUE	Empty	40S ribosomal protein S4 OS=Caenorhabditis elegans OX=6239 GN=rps-4 PE=1 SV=1	Q9N3X2|RS4_CAEEL	29 kDa		65		55	51
	TRUE	Empty	Glyceraldehyde-3-phosphate dehydrogenase 1 OS=Caenorhabditis elegans OX=6239 GN=gpd-1 PE=3 SV=1	P04970|G3P1_CAEEL (+1)	36 kDa	TRUE	46		69	51
	TRUE	Empty	T-complex protein 1 subunit theta OS=Caenorhabditis elegans OX=6239 GN=cct-8 PE=1 SV=3	Q9N358|TCPQ_CAEEL	60 kDa		54		65	52
	TRUE	Empty	V-type proton ATPase catalytic subunit A OS=Caenorhabditis elegans OX=6239 GN=vha-13 PE=1 SV=3	Q9XW92|VATA_CAEEL	66 kDa		72		38	71
	TRUE	Empty	Uncharacterized helicase C28H8.3 OS=Caenorhabditis elegans OX=6239 GN=C28H8.3 PE=3 SV=2	Q09475|YP93_CAEEL	194 kDa		26		68	49
	TRUE	Empty	Putative U5 small nuclear ribonucleoprotein 200 kDa helicase OS=Caenorhabditis elegans OX=6239 GN=snrp-200 PE=3 SV=1	Q9U2G0|U520_CAEEL	244 kDa		47		51	51
	TRUE	Empty	Probable glycylpeptide N-tetradecanoyltransferase OS=Caenorhabditis elegans OX=6239 GN=nmt-1 PE=3 SV=1	P46548|NMT_CAEEL	51 kDa		47		61	61
	TRUE	Empty	Glycine--tRNA ligase OS=Caenorhabditis elegans OX=6239 GN=gars-1 PE=1 SV=2	Q10039|GARS_CAEEL	84 kDa		51		69	53
	TRUE	Empty	Probable glycerol-3-phosphate dehydrogenase, mitochondrial OS=Caenorhabditis elegans OX=6239 GN=T25G3.4 PE=3 SV=2	P90795|GPDM_CAEEL	81 kDa		51		48	57
	TRUE	Empty	40S ribosomal protein S6 OS=Caenorhabditis elegans OX=6239 GN=rps-6 PE=1 SV=1	Q9NEN6|RS6_CAEEL	28 kDa		46		60	51
	TRUE	Empty	Eukaryotic translation initiation factor 3 subunit A OS=Caenorhabditis elegans OX=6239 GN=egl-45 PE=3 SV=1	P34339|EIF3A_CAEEL	124 kDa		35		60	55
	TRUE	Empty	T-complex protein 1 subunit delta OS=Caenorhabditis elegans OX=6239 GN=cct-4 PE=2 SV=1	P47208|TCPD_CAEEL	58 kDa		38		68	52
	TRUE	Empty	T-complex protein 1 subunit epsilon OS=Caenorhabditis elegans OX=6239 GN=cct-5 PE=2 SV=1	P47209|TCPE_CAEEL	59 kDa		43		46	50
	TRUE	Empty	T-complex protein 1 subunit gamma OS=Caenorhabditis elegans OX=6239 GN=cct-3 PE=3 SV=3	Q9N4J8|TCPG_CAEEL	60 kDa		44		52	53
	TRUE	Empty	60S ribosomal protein L37a OS=Caenorhabditis elegans OX=6239 GN=rpl-43 PE=3 SV=3	Q9U2A8|RL37A_CAEEL	10 kDa		47		82	44
	TRUE	Empty	40S ribosomal protein S17 OS=Caenorhabditis elegans OX=6239 GN=rps-17 PE=3 SV=2	O01692|RS17_CAEEL	15 kDa		50		65	56
	TRUE	Empty	Probable voltage-dependent anion-selective channel OS=Caenorhabditis elegans OX=6239 GN=vdac-1 PE=3 SV=2	Q21752|VDAC_CAEEL	30 kDa		36		78	57
	TRUE	Empty	Ribonucleoside-diphosphate reductase large subunit OS=Caenorhabditis elegans OX=6239 GN=rnr-1 PE=3 SV=1	Q03604|RIR1_CAEEL	89 kDa		19		105	25
	TRUE	Empty	T-complex protein 1 subunit alpha OS=Caenorhabditis elegans OX=6239 GN=cct-1 PE=3 SV=2	P41988|TCPA_CAEEL	59 kDa		39		58	52
	TRUE	Empty	60S ribosomal protein L35a OS=Caenorhabditis elegans OX=6239 GN=rpl-33 PE=1 SV=3	P49180|RL35A_CAEEL	14 kDa		50		49	51
	TRUE	Empty	60S ribosomal protein L13 OS=Caenorhabditis elegans OX=6239 GN=rpl-13 PE=3 SV=1	P91128|RL13_CAEEL	24 kDa		48		52	46
	TRUE	Empty	Enolase OS=Caenorhabditis elegans OX=6239 GN=enol-1 PE=1 SV=3	Q27527|ENO_CAEEL	47 kDa		43		56	54
	TRUE	Empty	Bifunctional glyoxylate cycle protein OS=Caenorhabditis elegans OX=6239 GN=icl-1 PE=1 SV=2	Q10663|GCP_CAEEL	109 kDa		68		17	55
	TRUE	Empty	Asparagine--tRNA ligase, cytoplasmic OS=Caenorhabditis elegans OX=6239 GN=nars-1 PE=3 SV=1	Q19722|SYNC_CAEEL	61 kDa		44		56	47
	TRUE	Empty	Phenylalanine--tRNA ligase beta subunit OS=Caenorhabditis elegans OX=6239 GN=fars-3 PE=3 SV=2	Q19713|SYFB_CAEEL	66 kDa		43		46	44
	TRUE	Empty	Cullin-associated NEDD8-dissociated protein 1 OS=Caenorhabditis elegans OX=6239 GN=cand-1 PE=1 SV=1	G5ED41|CAND1_CAEEL	142 kDa		30		60	48
	TRUE	Empty	60S ribosomal protein L6 OS=Caenorhabditis elegans OX=6239 GN=rpl-6 PE=1 SV=1	P47991|RL6_CAEEL	24 kDa		45		54	40
	TRUE	Empty	Cytochrome b-c1 complex subunit 1, mitochondrial OS=Caenorhabditis elegans OX=6239 GN=ucr-1 PE=3 SV=2	P98080|UCR1_CAEEL	52 kDa		43		47	48
	TRUE	Empty	DNA replication licensing factor mcm-5 OS=Caenorhabditis elegans OX=6239 GN=mcm-5 PE=3 SV=1	Q21902|MCM5_CAEEL	85 kDa		23		68	31
	TRUE	Empty	Probable glutamine--tRNA ligase OS=Caenorhabditis elegans OX=6239 GN=qars-1 PE=3 SV=1	O62431|SYQ_CAEEL	88 kDa		42		58	35
	TRUE	Empty	DNA-directed RNA polymerase II subunit RPB1 OS=Caenorhabditis elegans OX=6239 GN=ama-1 PE=1 SV=3	P16356|RPB1_CAEEL	205 kDa		32		45	41
	TRUE	Empty	T-complex protein 1 subunit beta OS=Caenorhabditis elegans OX=6239 GN=cct-2 PE=1 SV=2	P47207|TCPB_CAEEL	57 kDa		47		55	46
	TRUE	Empty	Endoplasmic reticulum chaperone BiP homolog OS=Caenorhabditis elegans OX=6239 GN=hsp-4 PE=1 SV=2	P20163|BIBH_CAEEL	72 kDa	TRUE	40	0	57	44
	TRUE	Empty	26S proteasome non-ATPase regulatory subunit 1 OS=Caenorhabditis elegans OX=6239 GN=rpn-2 PE=3 SV=4	Q18115|PSMD1_CAEEL	106 kDa		39		57	44
	TRUE	Empty	Probable arginine--tRNA ligase, cytoplasmic OS=Caenorhabditis elegans OX=6239 GN=rars-1 PE=3 SV=2	Q19825|SYRC_CAEEL	81 kDa		37		46	39
	TRUE	Empty	A-to-I RNA editing regulator adr-1 OS=Caenorhabditis elegans OX=6239 GN=adr-1 PE=1 SV=2	Q9U3D6|ADR1_CAEEL	107 kDa		53		37	56
	TRUE	Empty	Probable medium-chain specific acyl-CoA dehydrogenase 10, mitochondrial OS=Caenorhabditis elegans OX=6239 GN=acdh-10 PE=2 SV=1	Q22347|ACADM_CAEEL	45 kDa		55		37	41
	TRUE	Empty	Propionyl-CoA carboxylase alpha chain, mitochondrial OS=Caenorhabditis elegans OX=6239 GN=pcca-1 PE=1 SV=1	Q19842|PCCA_CAEEL	80 kDa		51		40	40
	TRUE	Empty	Methionine--tRNA ligase, cytoplasmic OS=Caenorhabditis elegans OX=6239 GN=mars-1 PE=3 SV=1	Q20970|SYMC_CAEEL	102 kDa		46		51	34
	TRUE	Empty	Eukaryotic translation initiation factor 3 subunit B OS=Caenorhabditis elegans OX=6239 GN=eif-3.B PE=3 SV=2	Q9XWI6|EIF3B_CAEEL	83 kDa		40		38	44
	TRUE	Empty	CAD protein OS=Caenorhabditis elegans OX=6239 GN=pyr-1 PE=1 SV=2	Q18990|PYR1_CAEEL	243 kDa		23		61	33
	TRUE	Empty	Probable cytoplasmic aconitate hydratase OS=Caenorhabditis elegans OX=6239 GN=aco-1 PE=1 SV=1	Q23500|ACOC_CAEEL	97 kDa		48		40	48
	TRUE	Empty	Clustered mitochondria protein homolog OS=Caenorhabditis elegans OX=6239 GN=clu-1 PE=3 SV=1	P34466|CLU_CAEEL	140 kDa		36		41	37
	TRUE	Empty	60S ribosomal protein L18a OS=Caenorhabditis elegans OX=6239 GN=rpl-20 PE=3 SV=2	O44480|RL18A_CAEEL	21 kDa		43		50	36
	TRUE	Empty	Probable 26S proteasome regulatory subunit 4 OS=Caenorhabditis elegans OX=6239 GN=rpt-2 PE=3 SV=1	O16368|PRS4_CAEEL	50 kDa		27		52	40
	TRUE	Empty	Protein disulfide-isomerase A6 homolog OS=Caenorhabditis elegans OX=6239 GN=pdi-6 PE=3 SV=1	Q11067|PDIA6_CAEEL	48 kDa		46		37	50
	TRUE	Empty	Spliceosome RNA helicase DDX39B homolog OS=Caenorhabditis elegans OX=6239 GN=hel-1 PE=2 SV=1	Q18212|DX39B_CAEEL	48 kDa		44		41	44
	TRUE	Empty	Polyubiquitin-A OS=Caenorhabditis elegans OX=6239 GN=ubq-1 PE=3 SV=1	P0CG71|UBIQ1_CAEEL (+1)	94 kDa		36		50	41
	TRUE	Empty	ATP-dependent RNA helicase laf-1 OS=Caenorhabditis elegans OX=6239 GN=laf-1 PE=1 SV=1	D0PV95|DDX3_CAEEL	76 kDa	TRUE	45		50	38
	TRUE	Empty	Obg-like ATPase 1 OS=Caenorhabditis elegans OX=6239 GN=ola-1 PE=3 SV=1	P91917|OLA1_CAEEL	44 kDa		40		46	38
	TRUE	Empty	40S ribosomal protein S7 OS=Caenorhabditis elegans OX=6239 GN=rps-7 PE=3 SV=1	Q23312|RS7_CAEEL	22 kDa		28		40	38
	TRUE	Empty	60S ribosomal protein L9 OS=Caenorhabditis elegans OX=6239 GN=rpl-9 PE=3 SV=1	Q95Y90|RL9_CAEEL	22 kDa		45		51	43
	TRUE	Empty	Probable coatomer subunit beta' OS=Caenorhabditis elegans OX=6239 GN=copb-2 PE=3 SV=3	Q20168|COPB2_CAEEL	111 kDa		37		36	38
	TRUE	Empty	Probable elongation factor 1-gamma OS=Caenorhabditis elegans OX=6239 GN=eef-1G PE=1 SV=1	P54412|EF1G_CAEEL	44 kDa		23		48	44
	TRUE	Empty	Alanine--tRNA ligase, cytoplasmic OS=Caenorhabditis elegans OX=6239 GN=aars-2 PE=2 SV=1	O01541|SYAC_CAEEL	107 kDa		27		42	30
	TRUE	Empty	DNA-directed RNA polymerase II subunit RPB2 OS=Caenorhabditis elegans OX=6239 GN=rpb-2 PE=2 SV=2	Q10578|RPB2_CAEEL	135 kDa		32		32	35
	TRUE	Empty	60S ribosomal protein L18 OS=Caenorhabditis elegans OX=6239 GN=rpl-18 PE=3 SV=1	O45946|RL18_CAEEL	21 kDa		21		53	32
	TRUE	Empty	Threonine--tRNA ligase, cytoplasmic OS=Caenorhabditis elegans OX=6239 GN=tars-1 PE=3 SV=1	P52709|SYTC_CAEEL	84 kDa		31		45	42
	TRUE	Empty	Lysine--tRNA ligase OS=Caenorhabditis elegans OX=6239 GN=kars-1 PE=3 SV=1	Q22099|SYK_CAEEL	65 kDa		33		43	36
	TRUE	Empty	Nuclear pore complex protein Nup98-Nup96 OS=Caenorhabditis elegans OX=6239 GN=npp-10 PE=1 SV=1	G5EEH9|NUP98_CAEEL	180 kDa		25		46	33
	TRUE	Empty	40S ribosomal protein S2 OS=Caenorhabditis elegans OX=6239 GN=rps-2 PE=3 SV=1	P51403|RS2_CAEEL	29 kDa		27		41	32
	TRUE	Empty	Vitellogenin-4 OS=Caenorhabditis elegans OX=6239 GN=vit-4 PE=1 SV=3	P18947|VIT4_CAEEL	186 kDa	TRUE	8		71	40
	TRUE	Empty	Ubiquitin carboxyl-terminal hydrolase 14 OS=Caenorhabditis elegans OX=6239 GN=usp-14 PE=2 SV=2	Q17361|UBP14_CAEEL	56 kDa		32		44	44
	TRUE	Empty	60S ribosomal protein L10a OS=Caenorhabditis elegans OX=6239 GN=rpl-1 PE=3 SV=1	Q9N4I4|RL10A_CAEEL	24 kDa		30		40	38
	TRUE	Empty	60S ribosomal protein L19 OS=Caenorhabditis elegans OX=6239 GN=rpl-19 PE=3 SV=1	O02639|RL19_CAEEL	24 kDa		38		37	32
	TRUE	Empty	Probable pyruvate dehydrogenase E1 component subunit alpha, mitochondrial OS=Caenorhabditis elegans OX=6239 GN=T05H10.6 PE=3 SV=1	P52899|ODPA_CAEEL	44 kDa		42		36	25
	TRUE	Empty	Aspartate--tRNA ligase, cytoplasmic OS=Caenorhabditis elegans OX=6239 GN=dars-1 PE=3 SV=1	Q03577|SYDC_CAEEL	60 kDa		30		37	33
	TRUE	Empty	26S proteasome regulatory subunit 7 OS=Caenorhabditis elegans OX=6239 GN=rpt-1 PE=1 SV=1	Q18787|PRS7_CAEEL	49 kDa		26		51	38
	TRUE	Empty	tRNA (guanine-N(7)-)-methyltransferase non-catalytic subunit OS=Caenorhabditis elegans OX=6239 GN=wdr-4 PE=3 SV=1	Q23232|WDR4_CAEEL	44 kDa		35		40	33
	TRUE	Empty	Ubiquitin carboxyl-terminal hydrolase 7 OS=Caenorhabditis elegans OX=6239 GN=math-33 PE=3 SV=1	Q7JKC3|UBP7_CAEEL	132 kDa		34		41	32
	TRUE	Empty	DNA replication licensing factor mcm-4 OS=Caenorhabditis elegans OX=6239 GN=mcm-4 PE=1 SV=1	Q95XQ8|MCM4_CAEEL	92 kDa		11		65	25
	TRUE	Empty	Probable elongation factor 1-beta/1-delta 2 OS=Caenorhabditis elegans OX=6239 GN=eef-1B.2 PE=1 SV=4	Q9U2H9|EF1B2_CAEEL	28 kDa	TRUE	26		40	44
	TRUE	Empty	Phosphate carrier protein, mitochondrial OS=Caenorhabditis elegans OX=6239 GN=F01G4.6 PE=2 SV=1	P40614|MPCP_CAEEL	37 kDa		32		41	37
	TRUE	Empty	Dolichyl-diphosphooligosaccharide--protein glycosyltransferase subunit 1 OS=Caenorhabditis elegans OX=6239 GN=ribo-1 PE=3 SV=2	Q9GZH4|RPN1_CAEEL	66 kDa		23		44	36
	TRUE	Empty	60S ribosomal protein L21 OS=Caenorhabditis elegans OX=6239 GN=rpl-21 PE=3 SV=3	P34334|RL21_CAEEL	18 kDa		35		29	34
	TRUE	Empty	Heat shock protein 110 OS=Caenorhabditis elegans OX=6239 GN=hsp-110 PE=3 SV=1	Q05036|HS110_CAEEL	87 kDa		17		46	36
	TRUE	Empty	Probable V-type proton ATPase subunit B OS=Caenorhabditis elegans OX=6239 GN=vha-12 PE=3 SV=1	Q19626|VATB_CAEEL	55 kDa		45		30	42
	TRUE	Empty	Probable arginine kinase ZC434.8 OS=Caenorhabditis elegans OX=6239 GN=ZC434.8 PE=3 SV=1	Q27535|KARG2_CAEEL	40 kDa		33		40	32
	TRUE	Empty	Proliferating cell nuclear antigen OS=Caenorhabditis elegans OX=6239 GN=pcn-1 PE=1 SV=3	O02115|PCNA_CAEEL	29 kDa		16		56	30
	TRUE	Empty	Pre-mRNA-splicing factor ATP-dependent RNA helicase ddx-15 OS=Caenorhabditis elegans OX=6239 GN=ddx-15 PE=3 SV=1	Q20875|DHX15_CAEEL	84 kDa		25		36	35
	TRUE	Empty	Probable serine/threonine-protein phosphatase PP2A regulatory subunit OS=Caenorhabditis elegans OX=6239 GN=paa-1 PE=1 SV=2	Q09543|2AAA_CAEEL	66 kDa		33		38	32
	TRUE	Empty	Endoplasmin homolog OS=Caenorhabditis elegans OX=6239 GN=enpl-1 PE=3 SV=1	Q22235|ENPL1_CAEEL	87 kDa	TRUE	21		32	45
	TRUE	Empty	26S proteasome non-ATPase regulatory subunit 6 OS=Caenorhabditis elegans OX=6239 GN=rpn-7 PE=2 SV=1	Q20585|PSMD6_CAEEL	48 kDa		28		44	35
	TRUE	Empty	Nuclear pore complex protein 14 OS=Caenorhabditis elegans OX=6239 GN=npp-14 PE=1 SV=1	Q17602|NU214_CAEEL	148 kDa		2		9	4
	TRUE	Empty	Eukaryotic translation initiation factor 3 subunit C OS=Caenorhabditis elegans OX=6239 GN=eif-3.C PE=3 SV=2	O02328|EIF3C_CAEEL	104 kDa		30		36	33
	TRUE	Empty	Probable fumarate hydratase, mitochondrial OS=Caenorhabditis elegans OX=6239 GN=fum-1 PE=3 SV=1	O17214|FUMH_CAEEL	54 kDa		29		37	37
	TRUE	Empty	GYF domain-containing protein C18H9.3 OS=Caenorhabditis elegans OX=6239 GN=C18H9.3 PE=4 SV=3	Q09237|YQ83_CAEEL	113 kDa		29		39	32
	TRUE	Empty	Chaperonin homolog Hsp-60, mitochondrial OS=Caenorhabditis elegans OX=6239 GN=hsp-60 PE=2 SV=2	P50140|CH60_CAEEL	60 kDa		15		37	44
	TRUE	Empty	Actin-depolymerizing factor 1, isoforms a/b OS=Caenorhabditis elegans OX=6239 GN=unc-60 PE=1 SV=2	Q07750|ADF1_CAEEL	24 kDa	TRUE	33		29	38
	TRUE	Empty	Probable arginine kinase F46H5.3 OS=Caenorhabditis elegans OX=6239 GN=F46H5.3 PE=3 SV=2	Q10454|KARG1_CAEEL	44 kDa		38		21	37
	TRUE	Empty	Kinetochore-associated protein rod-1 OS=Caenorhabditis elegans OX=6239 GN=rod-1 PE=1 SV=1	Q20849|KNTC1_CAEEL	234 kDa		4		75	10
	TRUE	Empty	Protein let-418 OS=Caenorhabditis elegans OX=6239 GN=let-418 PE=1 SV=1	G5EBZ4|LE418_CAEEL	209 kDa	TRUE	15		39	28
	TRUE	Empty	Nascent polypeptide-associated complex subunit alpha OS=Caenorhabditis elegans OX=6239 GN=icd-2 PE=1 SV=1	Q86S66|NACA_CAEEL	22 kDa		30		44	34
	TRUE	Empty	Catalase-2 OS=Caenorhabditis elegans OX=6239 GN=ctl-1 PE=2 SV=3	O61235|CATA2_CAEEL	57 kDa	TRUE	43		15	38
	TRUE	Empty	Probable histone H2B 3 OS=Caenorhabditis elegans OX=6239 GN=his-41 PE=3 SV=3	Q27484|H2B3_CAEEL (+1)	14 kDa		28		31	37
	TRUE	Empty	Stress-induced-phosphoprotein 1 OS=Caenorhabditis elegans OX=6239 GN=sti-1 PE=1 SV=1	O16259|STIP1_CAEEL	37 kDa		25		38	30
	TRUE	Empty	Isoleucine--tRNA ligase, cytoplasmic OS=Caenorhabditis elegans OX=6239 GN=iars-1 PE=3 SV=1	Q21926|SYIC_CAEEL	130 kDa		23		29	27
	TRUE	Empty	Zygote defective protein 9 OS=Caenorhabditis elegans OX=6239 GN=zyg-9 PE=1 SV=1	G5EEM5|ZYG9_CAEEL	156 kDa		12		39	21
	TRUE	Empty	Probable 26S proteasome regulatory subunit 10B OS=Caenorhabditis elegans OX=6239 GN=rpt-4 PE=1 SV=2	O17071|PRS10_CAEEL	46 kDa		23		42	34
	TRUE	Empty	Uncharacterized protein R05D3.9 OS=Caenorhabditis elegans OX=6239 GN=R05D3.9/R05D3.10 PE=3 SV=3	P34542|YNC9_CAEEL	73 kDa		30		18	47
	TRUE	Empty	UDP-glucose 6-dehydrogenase OS=Caenorhabditis elegans OX=6239 GN=sqv-4 PE=1 SV=1	Q19905|UGDH_CAEEL	53 kDa		26		45	33
	TRUE	Empty	Probable aconitate hydratase, mitochondrial OS=Caenorhabditis elegans OX=6239 GN=aco-2 PE=3 SV=2	P34455|ACON_CAEEL	84 kDa		20		28	36
	TRUE	Empty	40S ribosomal protein S5 OS=Caenorhabditis elegans OX=6239 GN=rps-5 PE=3 SV=1	P49041|RS5_CAEEL	23 kDa		26		36	38
	TRUE	Empty	Eukaryotic translation initiation factor 5A-1 OS=Caenorhabditis elegans OX=6239 GN=iff-1 PE=1 SV=1	P34563|IF5A1_CAEEL	18 kDa	TRUE	27		37	29
	TRUE	Empty	Probable serine--tRNA ligase, cytoplasmic OS=Caenorhabditis elegans OX=6239 GN=sars-1 PE=3 SV=1		55 kDa		23		36	36
	TRUE	Empty	60S ribosomal protein L26 OS=Caenorhabditis elegans OX=6239 GN=rpl-26 PE=3 SV=1	Q19869|RL26_CAEEL	16 kDa		27		37	27
	TRUE	Empty	Probable coatomer subunit gamma OS=Caenorhabditis elegans OX=6239 GN=T14G10.5 PE=3 SV=1	Q22498|COPG_CAEEL	96 kDa		23		33	30
	TRUE	Empty	Proteasomal ubiquitin receptor ADRM1 homolog OS=Caenorhabditis elegans OX=6239 GN=rpn-13 PE=1 SV=2	Q09289|ADRM1_CAEEL	40 kDa		27		38	33
	TRUE	Empty	Cullin-1 OS=Caenorhabditis elegans OX=6239 GN=cul-1 PE=1 SV=1	Q17389|CUL1_CAEEL	90 kDa		16		38	24
	TRUE	Empty	60S ribosomal protein L11-1 OS=Caenorhabditis elegans OX=6239 GN=rpl-11.1 PE=3 SV=1	Q94300|RL111_CAEEL	23 kDa	TRUE	28		33	31
	TRUE	Empty	Probable phosphoglycerate kinase OS=Caenorhabditis elegans OX=6239 GN=pgk-1 PE=3 SV=1	P91427|PGK_CAEEL	44 kDa		28		39	27
	TRUE	Empty	Tripeptidyl-peptidase 2 OS=Caenorhabditis elegans OX=6239 GN=tpp-2 PE=2 SV=1	Q09541|TPP2_CAEEL	151 kDa		7		40	39
	TRUE	Empty	Acetyl-CoA acetyltransferase homolog, mitochondrial OS=Caenorhabditis elegans OX=6239 GN=kat-1 PE=1 SV=2	Q22100|THILH_CAEEL	42 kDa		34		32	31
	TRUE	Empty	40S ribosomal protein S15 OS=Caenorhabditis elegans OX=6239 GN=rps-15 PE=1 SV=3	Q9XVP0|RS15_CAEEL	17 kDa		28		30	31
	TRUE	Empty	Chromatin-remodeling complex ATPase chain isw-1 OS=Caenorhabditis elegans OX=6239 GN=isw-1 PE=1 SV=2	P41877|ISW1_CAEEL	117 kDa		12		37	18
	TRUE	Empty	40S ribosomal protein S9 OS=Caenorhabditis elegans OX=6239 GN=rps-9 PE=3 SV=1	Q20228|RS9_CAEEL	22 kDa		17		33	31
	TRUE	Empty	2,3-bisphosphoglycerate-independent phosphoglycerate mutase OS=Caenorhabditis elegans OX=6239 GN=ipgm-1 PE=1 SV=1	G5EFZ1|GPMI_CAEEL	59 kDa		33		24	26
	TRUE	Empty	60S ribosomal protein L10 OS=Caenorhabditis elegans OX=6239 GN=rpl-10 PE=3 SV=1	Q09533|RL10_CAEEL	25 kDa		22		26	20
	TRUE	Empty	40S ribosomal protein S14 OS=Caenorhabditis elegans OX=6239 GN=rps-14 PE=3 SV=1	P48150|RS14_CAEEL	16 kDa		29		31	28
	TRUE	Empty	Succinate--CoA ligase [GDP-forming] subunit beta, mitochondrial OS=Caenorhabditis elegans OX=6239 GN=sucg-1 PE=3 SV=1	P53589|SUCB2_CAEEL	45 kDa		26		33	26
	TRUE	Empty	26S protease regulatory subunit 6A OS=Caenorhabditis elegans OX=6239 GN=rpt-5 PE=1 SV=1	O76371|PRS6A_CAEEL	48 kDa		23		36	29
	TRUE	Empty	Uncharacterized protein B0303.3 OS=Caenorhabditis elegans OX=6239 GN=B0303.3 PE=3 SV=1	P34255|YKA3_CAEEL	48 kDa		31		23	33
	TRUE	Empty	Vesicle-fusing ATPase OS=Caenorhabditis elegans OX=6239 GN=nsf-1 PE=1 SV=2	Q94392|NSF_CAEEL	91 kDa	TRUE	25		15	25
	TRUE	Empty	Splicing factor U2AF 65 kDa subunit OS=Caenorhabditis elegans OX=6239 GN=uaf-1 PE=2 SV=2	P90978|U2AF2_CAEEL	55 kDa		27		28	36
	TRUE	Empty	E3 ubiquitin-protein ligase hecd-1 OS=Caenorhabditis elegans OX=6239 GN=hecd-1 PE=1 SV=1	V6CLA2|HECD1_CAEEL	292 kDa		18		25	21
	TRUE	Empty	Myosin-2 OS=Caenorhabditis elegans OX=6239 GN=myo-2 PE=1 SV=2	P12845|MYO2_CAEEL	223 kDa	TRUE	43		0	20
	TRUE	Empty	Actin-related protein 2 OS=Caenorhabditis elegans OX=6239 GN=arx-2 PE=3 SV=1	P53489|ARP2_CAEEL	45 kDa		31		31	28
	TRUE	Empty	Transitional endoplasmic reticulum ATPase homolog 2 OS=Caenorhabditis elegans OX=6239 GN=cdc-48.2 PE=1 SV=2	P54812|TERA2_CAEEL	90 kDa	TRUE	22		39	26
	TRUE	Empty	Probable isocitrate dehydrogenase [NAD] subunit alpha, mitochondrial OS=Caenorhabditis elegans OX=6239 GN=idha-1 PE=3 SV=3	Q93714|IDH3A_CAEEL	38 kDa		28		30	28
	TRUE	Empty	Structural maintenance of chromosomes protein 1 OS=Caenorhabditis elegans OX=6239 GN=him-1 PE=1 SV=4	O01789|SMC1_CAEEL	144 kDa		18		24	25
	TRUE	Empty	RuvB-like 1 OS=Caenorhabditis elegans OX=6239 GN=ruvb-1 PE=1 SV=2	O17607|RUVB1_CAEEL	53 kDa		28		23	23
	TRUE	Empty	2-oxoglutarate dehydrogenase, mitochondrial OS=Caenorhabditis elegans OX=6239 GN=ogdh-1 PE=1 SV=2	O61199|ODO1_CAEEL	116 kDa		40		23	22
	TRUE	Empty	Histone H4 OS=Caenorhabditis elegans OX=6239 GN=his-1 PE=1 SV=2	P62784|H4_CAEEL	11 kDa		31		24	30
	TRUE	Empty	60S ribosomal protein L13a OS=Caenorhabditis elegans OX=6239 GN=rpl-16 PE=2 SV=1	Q27389|RL13A_CAEEL	23 kDa		29		30	23
	TRUE	Empty	60S ribosomal protein L17 OS=Caenorhabditis elegans OX=6239 GN=rpl-17 PE=3 SV=1	Q9BL19|RL17_CAEEL	22 kDa		24		30	23
	TRUE	Empty	Succinate dehydrogenase [ubiquinone] flavoprotein subunit, mitochondrial OS=Caenorhabditis elegans OX=6239 GN=sdha-1 PE=2 SV=3	Q09508|SDHA_CAEEL	70 kDa		29		23	33
	TRUE	Empty	MOG interacting and ectopic P-granules protein 1 OS=Caenorhabditis elegans OX=6239 GN=mep-1 PE=1 SV=2	Q21502|MEP1_CAEEL	97 kDa		23		23	27
	TRUE	Empty	mRNA transport homolog 4 OS=Caenorhabditis elegans OX=6239 GN=mtr-4 PE=3 SV=1	Q23223|MTR4_CAEEL	116 kDa		19		24	25
	TRUE	Empty	Disks large homolog 1 OS=Caenorhabditis elegans OX=6239 GN=dlg-1 PE=1 SV=1	G5ECY0|DLG1_CAEEL	107 kDa		28		9	44
	TRUE	Empty	Probable S-adenosylmethionine synthase 1 OS=Caenorhabditis elegans OX=6239 GN=sams-1 PE=1 SV=1	O17680|METK1_CAEEL	44 kDa	TRUE	35		16	26
	TRUE	Empty	Probable 26S proteasome regulatory subunit 6B OS=Caenorhabditis elegans OX=6239 GN=rpt-3 PE=3 SV=1	P46502|PRS6B_CAEEL	46 kDa		18		33	22
	TRUE	Empty	Mitotic chromosome and X-chromosome-associated protein mix-1 OS=Caenorhabditis elegans OX=6239 GN=mix-1 PE=1 SV=2	Q09591|MIX1_CAEEL	140 kDa		11		32	16
	TRUE	Empty	Probable replication factor A 73 kDa subunit OS=Caenorhabditis elegans OX=6239 GN=rpa-1 PE=1 SV=1	Q19537|RFA1_CAEEL	73 kDa		17		47	25
	TRUE	Empty	Probable V-type proton ATPase subunit H 2 OS=Caenorhabditis elegans OX=6239 GN=vha-15 PE=3 SV=1	Q22494|VATH2_CAEEL	54 kDa		37		18	34
	TRUE	Empty	Ran GTPase-activating protein 2 OS=Caenorhabditis elegans OX=6239 GN=ran-2 PE=4 SV=3	P34342|RGP2_CAEEL	106 kDa		23		24	21
	TRUE	Empty	Nucleolar protein 56 OS=Caenorhabditis elegans OX=6239 GN=nol-56 PE=3 SV=1	Q21276|NOP56_CAEEL	55 kDa		26		26	30
	TRUE	Empty	Histidine--tRNA ligase OS=Caenorhabditis elegans OX=6239 GN=hars-1 PE=2 SV=3	P34183|SYH_CAEEL	59 kDa		16		33	24
	TRUE	Empty	60S ribosomal protein L22 OS=Caenorhabditis elegans OX=6239 GN=rpl-22 PE=1 SV=3	P52819|RL22_CAEEL	15 kDa		26		31	23
	TRUE	Empty	COP9/Signalosome and eIF3 complex-shared subunit 1 OS=Caenorhabditis elegans OX=6239 GN=cif-1 PE=1 SV=1	Q94261|EIF3M_CAEEL	44 kDa		21		30	22
	TRUE	Empty	ATP-dependent RNA helicase cgh-1 OS=Caenorhabditis elegans OX=6239 GN=cgh-1 PE=1 SV=1	Q95YF3|CGH1_CAEEL	49 kDa		20		33	21
	TRUE	Empty	Serine/threonine-protein phosphatase 2A regulatory subunit sur-6 OS=Caenorhabditis elegans OX=6239 GN=sur-6 PE=1 SV=1	G5EDR3|2AB1_CAEEL	57 kDa		20		27	29
	TRUE	Empty	GMP reductase OS=Caenorhabditis elegans OX=6239 GN=F32D1.5 PE=3 SV=1	O16294|GMPR_CAEEL	39 kDa		22		28	23
	TRUE	Empty	26S proteasome non-ATPase regulatory subunit 3 OS=Caenorhabditis elegans OX=6239 GN=rpn-3 PE=1 SV=1	Q04908|PSMD3_CAEEL	58 kDa		14		30	25
	TRUE	Empty	Ubiquitin fusion degradation protein 3 homolog OS=Caenorhabditis elegans OX=6239 GN=ufd-3 PE=1 SV=1	G5EES6|UFD3_CAEEL	94 kDa		20		26	33
	TRUE	Empty	Calreticulin OS=Caenorhabditis elegans OX=6239 GN=crt-1 PE=1 SV=1	P27798|CALR_CAEEL	46 kDa		21		23	34
	TRUE	Empty	60S ribosomal protein L12 OS=Caenorhabditis elegans OX=6239 GN=rpl-12 PE=3 SV=1	P61866|RL12_CAEEL	18 kDa		29		28	22
	TRUE	Empty	Eukaryotic translation initiation factor 3 subunit L OS=Caenorhabditis elegans OX=6239 GN=eif-3.L PE=3 SV=1	Q95QW0|EIF3L_CAEEL	62 kDa		16		30	23
	TRUE	Empty	Mitochondrial prohibitin complex protein 2 OS=Caenorhabditis elegans OX=6239 GN=phb-2 PE=1 SV=2	P50093|PHB2_CAEEL	33 kDa		20		22	20
	TRUE	Empty	14-3-3-like protein 1 OS=Caenorhabditis elegans OX=6239 GN=par-5 PE=1 SV=2	P41932|14331_CAEEL	28 kDa	TRUE	25		27	25
	TRUE	Empty	40S ribosomal protein S28 OS=Caenorhabditis elegans OX=6239 GN=rps-28 PE=3 SV=1	Q95Y04|RS28_CAEEL	7 kDa		23		29	27
	TRUE	Empty	Protein SEC13 homolog OS=Caenorhabditis elegans OX=6239 GN=npp-20 PE=3 SV=1	Q9N4A7|SEC13_CAEEL	35 kDa		25		28	25
	TRUE	Empty	Probable GMP synthase [glutamine-hydrolyzing] OS=Caenorhabditis elegans OX=6239 GN=gmps-1 PE=3 SV=3	Q09580|GUAA_CAEEL	83 kDa		27		29	15
	TRUE	Empty	Adenylosuccinate lyase OS=Caenorhabditis elegans OX=6239 GN=adsl-1 PE=1 SV=1	Q21774|PUR8_CAEEL	54 kDa		19		27	22
	TRUE	Empty	RuvB-like 2 OS=Caenorhabditis elegans OX=6239 GN=ruvb-2 PE=1 SV=1	Q9GZH2|RUVB2_CAEEL	49 kDa		22		28	26
	TRUE	Empty	Paramyosin OS=Caenorhabditis elegans OX=6239 GN=unc-15 PE=1 SV=2	P10567|MYSP_CAEEL	101 kDa		32			37
	TRUE	Empty	Pre-mRNA-splicing factor 8 homolog OS=Caenorhabditis elegans OX=6239 GN=prp-8 PE=1 SV=1	P34369|PRP8_CAEEL	272 kDa		8		24	18
	TRUE	Empty	60S ribosomal protein L23 OS=Caenorhabditis elegans OX=6239 GN=rpl-23 PE=3 SV=1	P48158|RL23_CAEEL	15 kDa		24		30	25
	TRUE	Empty	40S ribosomal protein S25 OS=Caenorhabditis elegans OX=6239 GN=rps-25 PE=3 SV=1	P52821|RS25_CAEEL	13 kDa		24		29	28
	TRUE	Empty	DNA polymerase delta catalytic subunit OS=Caenorhabditis elegans OX=6239 GN=F10C2.4 PE=3 SV=1	P90829|DPOD1_CAEEL	121 kDa		11		35	15
	TRUE	Empty	Protein hsr-9 OS=Caenorhabditis elegans OX=6239 GN=hsr-9 PE=2 SV=1	Q7JKP6|HSR9_CAEEL	128 kDa		14		25	26
	TRUE	Empty	Probable peroxiredoxin prdx-3 OS=Caenorhabditis elegans OX=6239 GN=prdx-3 PE=3 SV=1	Q21824|TDX1_CAEEL	25 kDa		20		21	23
	TRUE	Empty	Probable splicing factor, arginine/serine-rich 3 OS=Caenorhabditis elegans OX=6239 GN=rsp-3 PE=1 SV=2	Q9NEW6|RSP3_CAEEL	29 kDa		21		21	24
	TRUE	Empty	Vinculin OS=Caenorhabditis elegans OX=6239 GN=deb-1 PE=2 SV=1	P19826|VINC_CAEEL	112 kDa		29		0	32
	TRUE	Empty	Probable citrate synthase, mitochondrial OS=Caenorhabditis elegans OX=6239 GN=cts-1 PE=3 SV=1	P34575|CISY_CAEEL	52 kDa		24		22	26
	TRUE	Empty	Probable histone-binding protein lin-53 OS=Caenorhabditis elegans OX=6239 GN=lin-53 PE=1 SV=2	P90916|LIN53_CAEEL	47 kDa		22		26	26
	TRUE	Empty	Protein phosphatase ppm-1.A OS=Caenorhabditis elegans OX=6239 GN=ppm-1.A PE=1 SV=1	Q19775|PPM1A_CAEEL	52 kDa		19		30	23
	TRUE	Empty	Eukaryotic translation initiation factor 3 subunit H OS=Caenorhabditis elegans OX=6239 GN=eif-3.H PE=3 SV=2	O01974|EIF3H_CAEEL	41 kDa		22		23	23
	TRUE	Empty	Prolyl 4-hydroxylase subunit alpha-1 OS=Caenorhabditis elegans OX=6239 GN=dpy-18 PE=1 SV=2	Q10576|P4HA1_CAEEL	64 kDa		22		11	23
	TRUE	Empty	Probable UDP-N-acetylglucosamine pyrophosphorylase OS=Caenorhabditis elegans OX=6239 GN=C36A4.4 PE=3 SV=2	Q18493|UAP1_CAEEL	53 kDa		18		32	20
	TRUE	Empty	GTP-binding nuclear protein ran-1 OS=Caenorhabditis elegans OX=6239 GN=ran-1 PE=1 SV=1	O17915|RAN_CAEEL	24 kDa		24		28	22
	TRUE	Empty	Succinate--CoA ligase [ADP-forming] subunit beta, mitochondrial OS=Caenorhabditis elegans OX=6239 GN=suca-1 PE=3 SV=1	P53588|SUCB1_CAEEL	47 kDa		31		20	25
	TRUE	Empty	Glutamate--cysteine ligase OS=Caenorhabditis elegans OX=6239 GN=gcs-1 PE=1 SV=2	Q20117|GSH1_CAEEL	74 kDa		27		19	26
	TRUE	Empty	Serrate RNA effector molecule homolog OS=Caenorhabditis elegans OX=6239 GN=E01A2.2 PE=3 SV=1	Q966L5|SRRT_CAEEL	81 kDa		21		20	23
	TRUE	Empty	DNA replication licensing factor mcm-6 OS=Caenorhabditis elegans OX=6239 GN=mcm-6 PE=1 SV=1	P34647|MCM6_CAEEL	91 kDa		7		34	9
	TRUE	Empty	32 kDa beta-galactoside-binding lectin lec-3 OS=Caenorhabditis elegans OX=6239 GN=lec-3 PE=2 SV=3	Q09581|LEC3_CAEEL	34 kDa		27		7	24
	TRUE	Empty	Glucose-6-phosphate 1-dehydrogenase OS=Caenorhabditis elegans OX=6239 GN=gspd-1 PE=3 SV=1	Q27464|G6PD_CAEEL	60 kDa		22		20	18
	TRUE	Empty	Myosin-1 OS=Caenorhabditis elegans OX=6239 GN=myo-1 PE=1 SV=3	P02567|MYO1_CAEEL	223 kDa	TRUE	39		0	14
	TRUE	Empty	Myosin regulatory light chain 2 OS=Caenorhabditis elegans OX=6239 GN=mlc-2 PE=4 SV=1	P19626|MLR2_CAEEL	19 kDa	TRUE	35		4	29
	TRUE	Empty	60S ribosomal protein L27 OS=Caenorhabditis elegans OX=6239 GN=rpl-27 PE=2 SV=1	P91914|RL27_CAEEL	16 kDa		17		25	21
	TRUE	Empty	Ubiquitin carboxyl-terminal hydrolase ubh-4 OS=Caenorhabditis elegans OX=6239 GN=ubh-4 PE=1 SV=2	Q09444|UBH4_CAEEL	37 kDa		25		25	22
	TRUE	Empty	Pre-mRNA-processing factor 19 OS=Caenorhabditis elegans OX=6239 GN=prp-19 PE=3 SV=2	Q10051|PRP19_CAEEL	53 kDa		17		22	25
	TRUE	Empty	Protein unc-112 OS=Caenorhabditis elegans OX=6239 GN=unc-112 PE=1 SV=1	Q18685|UN112_CAEEL	82 kDa		26		11	30
	TRUE	Empty	Suppressor of Ty 6 homolog OS=Caenorhabditis elegans OX=6239 GN=emb-5 PE=1 SV=1	P34703|SPT6H_CAEEL	176 kDa		18		16	19
	TRUE	Empty	40S ribosomal protein S21 OS=Caenorhabditis elegans OX=6239 GN=rps-21 PE=1 SV=1	P49197|RS21_CAEEL	10 kDa		16		32	24
	TRUE	Empty	Probable coatomer subunit delta OS=Caenorhabditis elegans OX=6239 GN=copd-1 PE=3 SV=1	Q09236|COPD_CAEEL	57 kDa		18		18	23
	TRUE	Empty	60S ribosomal protein L23a 2 OS=Caenorhabditis elegans OX=6239 GN=rpl-25.2 PE=3 SV=1	Q20647|R23A2_CAEEL	16 kDa	TRUE	13		32	23
	TRUE	Empty	Basement membrane proteoglycan OS=Caenorhabditis elegans OX=6239 GN=unc-52 PE=1 SV=2	Q06561|UNC52_CAEEL	369 kDa		19		0	28
	TRUE	Empty	Probable glycerol-3-phosphate dehydrogenase 2 OS=Caenorhabditis elegans OX=6239 GN=gpdh-2 PE=3 SV=2	P34517|GPDH2_CAEEL	43 kDa		23		23	21
	TRUE	Empty	FACT complex subunit spt-16 OS=Caenorhabditis elegans OX=6239 GN=spt-16 PE=3 SV=1	Q9N5R9|SPT16_CAEEL	117 kDa		11		29	18
	TRUE	Empty	Glycogen [starch] synthase OS=Caenorhabditis elegans OX=6239 GN=gsy-1 PE=1 SV=1	Q9U2D9|GYS_CAEEL	76 kDa		22		20	16
	TRUE	Empty	Serine/threonine-protein phosphatase 2A catalytic subunit OS=Caenorhabditis elegans OX=6239 GN=let-92 PE=1 SV=1	G5EGK8|PP2A_CAEEL	36 kDa		26		24	22
	TRUE	Empty	ADP-ribosylation factor 1-like 2 OS=Caenorhabditis elegans OX=6239 GN=arf-1.2 PE=2 SV=2	Q10943|ARF12_CAEEL	21 kDa		19		26	23
	TRUE	Empty	Regulator of chromosome condensation OS=Caenorhabditis elegans OX=6239 GN=ran-3 PE=4 SV=1	Q18211|RCC1_CAEEL	61 kDa		17		25	23
	TRUE	Empty	Structural maintenance of chromosomes protein 3 OS=Caenorhabditis elegans OX=6239 GN=smc-3 PE=1 SV=1	B2FDA8|SMC3_CAEEL	147 kDa		5		20	16
	TRUE	Empty	Piwi-like protein ergo-1 OS=Caenorhabditis elegans OX=6239 GN=ergo-1 PE=1 SV=2	O61931|ERGO1_CAEEL	127 kDa		16		27	22
	TRUE	Empty	Dynamin OS=Caenorhabditis elegans OX=6239 GN=dyn-1 PE=1 SV=3	P39055|DYN1_CAEEL	93 kDa		13		14	21
	TRUE	Empty	Fructose-bisphosphate aldolase 2 OS=Caenorhabditis elegans OX=6239 GN=aldo-2 PE=2 SV=1	P46563|ALF2_CAEEL	39 kDa		18		27	19
	TRUE	Empty	Probable S-adenosylmethionine synthase 3 OS=Caenorhabditis elegans OX=6239 GN=sams-3 PE=1 SV=1	P50305|METK3_CAEEL	44 kDa	TRUE	28		21	23
	TRUE	Empty	Tubulin--tyrosine ligase-like protein 12 OS=Caenorhabditis elegans OX=6239 GN=ttll-12 PE=4 SV=1	Q09512|TTL12_CAEEL	77 kDa		17		27	19
	TRUE	Empty	Nuclear RNAi defective-3 protein OS=Caenorhabditis elegans OX=6239 GN=nrde-3 PE=1 SV=1	Q21691|NRDE3_CAEEL	120 kDa		24		16	19
	TRUE	Empty	N-terminal acetyltransferase B complex subunit NAA25 homolog OS=Caenorhabditis elegans OX=6239 GN=cra-1 PE=1 SV=3	Q21986|NAA25_CAEEL	109 kDa		19		23	15
	TRUE	Empty	Actin-related protein 3 OS=Caenorhabditis elegans OX=6239 GN=arx-1 PE=3 SV=1	Q9N4I0|ARP3_CAEEL	48 kDa		20		27	18
	TRUE	Empty	G4SLH0-DECOY	G4SLH0-DECOY	?		3		1	4
	TRUE	Empty	Phosphatidylinositol 3,4,5-trisphosphate 3-phosphatase and dual-specificity protein phosphatase daf-18 OS=Caenorhabditis elegans OX=6239 GN=daf-18 PE=1 SV=1	G5EE01|PTEN_CAEEL	110 kDa		6		35	18
	TRUE	Empty	Serine/threonine-protein kinase tousled-like 1 OS=Caenorhabditis elegans OX=6239 GN=tlk-1 PE=1 SV=3	P34314|TLK1_CAEEL	109 kDa		18		18	21
	TRUE	Empty	SWI/SNF nucleosome remodeling complex component OS=Caenorhabditis elegans OX=6239 GN=C08B11.3 PE=4 SV=1	Q09441|SWSN7_CAEEL	139 kDa		18		18	18
	TRUE	Empty	Probable calcium-binding mitochondrial carrier K02F3.2 OS=Caenorhabditis elegans OX=6239 GN=K02F3.2 PE=3 SV=3	Q21153|CMC1_CAEEL	80 kDa		21		19	19
	TRUE	Empty	Histone deacetylase 1 OS=Caenorhabditis elegans OX=6239 GN=hda-1 PE=1 SV=1	O17695|HDA1_CAEEL	52 kDa		21		21	25
	TRUE	Empty	40S ribosomal protein S19 OS=Caenorhabditis elegans OX=6239 GN=rps-19 PE=2 SV=1	O18650|RS19_CAEEL	16 kDa		19		22	22
	TRUE	Empty	Casein kinase I isoform alpha OS=Caenorhabditis elegans OX=6239 GN=kin-19 PE=3 SV=1	P42168|KC1A_CAEEL	39 kDa	TRUE	20		21	17
	TRUE	Empty	Signal recognition particle subunit SRP72 OS=Caenorhabditis elegans OX=6239 GN=srpa-72 PE=3 SV=2	P91240|SRP72_CAEEL	71 kDa		19		23	22
	TRUE	Empty	Probable methylenetetrahydrofolate reductase OS=Caenorhabditis elegans OX=6239 GN=mthf-1 PE=3 SV=2	Q17693|MTHR_CAEEL	75 kDa		27		13	18
	TRUE	Empty	rRNA 2'-O-methyltransferase fibrillarin OS=Caenorhabditis elegans OX=6239 GN=fib-1 PE=2 SV=1	Q22053|FBRL_CAEEL	36 kDa		21		18	27
	TRUE	Empty	Probable methylmalonyl-CoA mutase, mitochondrial OS=Caenorhabditis elegans OX=6239 GN=mmcm-1 PE=3 SV=2	Q23381|MUTA_CAEEL	82 kDa		19		18	18
	TRUE	Orange	Protein sax-3 OS=Caenorhabditis elegans OX=6239 GN=sax-3 PE=2 SV=1	G5EBF1|SAX3_CAEEL	139 kDa				7	48
	TRUE	Empty	Titin homolog OS=Caenorhabditis elegans OX=6239 GN=ttn-1 PE=1 SV=2	G4SLH0|TTN1_CAEEL	2057 kDa		5		3	4
	TRUE	Empty	DEAD-box ATP-dependent RNA helicase rde-12 OS=Caenorhabditis elegans OX=6239 GN=rde-12 PE=1 SV=4	P90897|RDE12_CAEEL	104 kDa		8		29	20
	TRUE	Empty	Mitochondrial prohibitin complex protein 1 OS=Caenorhabditis elegans OX=6239 GN=phb-1 PE=1 SV=1	Q9BKU4|PHB1_CAEEL	30 kDa		12		27	22
	TRUE	Empty	Probable cleavage and polyadenylation specificity factor subunit 1 OS=Caenorhabditis elegans OX=6239 GN=cpsf-1 PE=3 SV=2	Q9N4C2|CPSF1_CAEEL	163 kDa		18		10	19
	TRUE	Empty	Elongation factor G, mitochondrial OS=Caenorhabditis elegans OX=6239 GN=gfm-1 PE=3 SV=1	Q9XV52|EFGM_CAEEL	84 kDa		16		13	17
	TRUE	Empty	UDP-N-acetylglucosamine--peptide N-acetylglucosaminyltransferase OS=Caenorhabditis elegans OX=6239 GN=ogt-1 PE=1 SV=2	O18158|OGT1_CAEEL	128 kDa		21		6	15
	TRUE	Empty	26S proteasome non-ATPase regulatory subunit 14 OS=Caenorhabditis elegans OX=6239 GN=rpn-11 PE=1 SV=1	O76577|PSDE_CAEEL	35 kDa		15		25	21
	TRUE	Empty	Nuclear pore complex protein 15 OS=Caenorhabditis elegans OX=6239 GN=npp-15 PE=3 SV=4	P34343|NU133_CAEEL	128 kDa		10		22	15
	TRUE	Empty	Lamin-1 OS=Caenorhabditis elegans OX=6239 GN=lmn-1 PE=1 SV=2	Q21443|LMN1_CAEEL	64 kDa		9		13	22
	TRUE	Empty	Putative ATP synthase subunit f, mitochondrial OS=Caenorhabditis elegans OX=6239 GN=R53.4 PE=3 SV=1	Q22021|ATPK_CAEEL	19 kDa		24		17	21
	TRUE	Empty	Low-density lipoprotein receptor-related protein OS=Caenorhabditis elegans OX=6239 GN=lrp-1 PE=1 SV=1	Q04833|LRP_CAEEL	526 kDa		13		1	20
	TRUE	Empty	ATP-dependent RNA helicase glh-1 OS=Caenorhabditis elegans OX=6239 GN=glh-1 PE=1 SV=3	P34689|GLH1_CAEEL	80 kDa	TRUE	13		35	12
	TRUE	Empty	6-phosphogluconate dehydrogenase, decarboxylating OS=Caenorhabditis elegans OX=6239 GN=T25B9.9 PE=3 SV=2	Q17761|6PGD_CAEEL	53 kDa		19		23	19
	TRUE	Empty	Protein unc-87 OS=Caenorhabditis elegans OX=6239 GN=unc-87 PE=1 SV=3	P37806|UNC87_CAEEL	63 kDa		33		2	19
	TRUE	Empty	Adenylosuccinate synthetase OS=Caenorhabditis elegans OX=6239 GN=adss-1 PE=3 SV=3	P91134|PURA_CAEEL	50 kDa		17		26	18
	TRUE	Empty	Disorganized muscle protein 1 OS=Caenorhabditis elegans OX=6239 GN=dim-1 PE=1 SV=3	Q18066|DIM_CAEEL	72 kDa		26		8	21
	TRUE	Empty	Mitotic checkpoint protein bub-3 OS=Caenorhabditis elegans OX=6239 GN=bub-3 PE=1 SV=1	Q9XWH0|BUB3_CAEEL	38 kDa		14		25	17
	TRUE	Empty	Probable mitochondrial import inner membrane translocase subunit tin-44 OS=Caenorhabditis elegans OX=6239 GN=tin-44 PE=3 SV=1	O02161|TIM44_CAEEL	49 kDa		16		17	18
	TRUE	Empty	Eukaryotic peptide chain release factor subunit 1 OS=Caenorhabditis elegans OX=6239 GN=erfa-1 PE=3 SV=3	O16520|ERF1_CAEEL	66 kDa		11		29	16
	TRUE	Empty	Probable delta-1-pyrroline-5-carboxylate synthase OS=Caenorhabditis elegans OX=6239 GN=alh-13 PE=3 SV=2	P54889|ALH13_CAEEL	87 kDa		24		8	26
	TRUE	Empty	Centromere/kinetochore protein zw10 homolog OS=Caenorhabditis elegans OX=6239 GN=czw-1 PE=1 SV=1	Q19642|ZW10_CAEEL	88 kDa		4		35	13
	TRUE	Empty	L-lactate dehydrogenase OS=Caenorhabditis elegans OX=6239 GN=ldh-1 PE=2 SV=1	Q27888|LDH_CAEEL	36 kDa		21		17	18
	TRUE	Empty	Alcohol dehydrogenase class-3 OS=Caenorhabditis elegans OX=6239 GN=H24K24.3 PE=1 SV=1	Q17335|ADHX_CAEEL	41 kDa		21		16	19
	TRUE	Empty	Protein disulfide-isomerase 1 OS=Caenorhabditis elegans OX=6239 GN=pdi-1 PE=3 SV=1	Q17967|PDI1_CAEEL	53 kDa		14		20	22
	TRUE	Empty	Ankyrin repeat and KH domain-containing protein mask-1 OS=Caenorhabditis elegans OX=6239 GN=mask-1 PE=3 SV=3	Q21920|ANKHM_CAEEL	287 kDa		7		22	10
	TRUE	Empty	AFG3-like protein spg-7 OS=Caenorhabditis elegans OX=6239 GN=spg-7 PE=3 SV=2	Q9N3T5|AFG3_CAEEL	87 kDa		13		14	12
	TRUE	Empty	Guanine nucleotide-binding protein G(o) subunit alpha OS=Caenorhabditis elegans OX=6239 GN=goa-1 PE=1 SV=3	P51875|GNAO_CAEEL	40 kDa	TRUE	23		15	18
	TRUE	Empty	Probable 26S proteasome regulatory subunit rpn-6.1 OS=Caenorhabditis elegans OX=6239 GN=rpn-6.1 PE=2 SV=2	Q20938|PS11A_CAEEL	49 kDa		12		26	15
	TRUE	Empty	60 kDa SS-A/Ro ribonucleoprotein homolog OS=Caenorhabditis elegans OX=6239 GN=rop-1 PE=2 SV=1	Q27274|RO60_CAEEL	73 kDa		11		23	13
	TRUE	Empty	Profilin-1 OS=Caenorhabditis elegans OX=6239 GN=pfn-1 PE=2 SV=1	Q9XW16|PROF1_CAEEL	14 kDa		15		24	19
	TRUE	Empty	Dihydropyrimidine dehydrogenase [NADP(+)] OS=Caenorhabditis elegans OX=6239 GN=dpyd-1 PE=3 SV=2	Q18164|DPYD_CAEEL	115 kDa		24			20
	TRUE	Empty	Perilipin-1 homolog OS=Caenorhabditis elegans OX=6239 GN=plin-1 PE=1 SV=1	A8WHP8|PLIN1_CAEEL	47 kDa		6		28	18
	TRUE	Empty	Tyrosine protein-kinase src-1 OS=Caenorhabditis elegans OX=6239 GN=src-1 PE=1 SV=1	G5EE56|SRC1_CAEEL	61 kDa		22		10	21
	TRUE	Empty	UBX domain-containing protein 3 OS=Caenorhabditis elegans OX=6239 GN=ubxn-3 PE=1 SV=1	H2L056|UBXN3_CAEEL	70 kDa		10		14	14
	TRUE	Empty	Kinesin heavy chain OS=Caenorhabditis elegans OX=6239 GN=unc-116 PE=2 SV=2	P34540|KINH_CAEEL	92 kDa		7		9	16
	TRUE	Empty	Serine/threonine-protein phosphatase PP1-beta OS=Caenorhabditis elegans OX=6239 GN=gsp-2 PE=1 SV=1	P48727|GLC7B_CAEEL	38 kDa	TRUE	14		19	22
	TRUE	Empty	Uncharacterized serine carboxypeptidase F41C3.5 OS=Caenorhabditis elegans OX=6239 GN=F41C3.5 PE=1 SV=1	P52717|YUW5_CAEEL	54 kDa		17		15	16
	TRUE	Empty	Mitochondrial import receptor subunit tomm-70 OS=Caenorhabditis elegans OX=6239 GN=tomm-70 PE=2 SV=3	Q02335|TOM70_CAEEL	65 kDa		10		16	13
	TRUE	Empty	Cullin-3 OS=Caenorhabditis elegans OX=6239 GN=cul-3 PE=1 SV=2	Q17391|CUL3_CAEEL	90 kDa		8		23	12
	TRUE	Empty	Transducer of Cdc42-dependent actin assembly protein 1 homolog OS=Caenorhabditis elegans OX=6239 GN=toca-1 PE=1 SV=2	Q19253|TOCA1_CAEEL	65 kDa		19		9	21
	TRUE	Empty	Gex-3-interacting protein 13 OS=Caenorhabditis elegans OX=6239 GN=gei-13 PE=1 SV=2	P34478|GEI13_CAEEL	77 kDa		18		2	32
	TRUE	Empty	Cysteine synthase 1 OS=Caenorhabditis elegans OX=6239 GN=cysl-1 PE=1 SV=2	Q93244|CYSK1_CAEEL	36 kDa		23		2	24
	TRUE	Empty	Structural maintenance of chromosomes protein 4 OS=Caenorhabditis elegans OX=6239 GN=smc-4 PE=1 SV=1	Q20060|SMC4_CAEEL	177 kDa		2		29	4
	TRUE	Empty	E3 ubiquitin-protein ligase bre-1 OS=Caenorhabditis elegans OX=6239 GN=rfp-1 PE=1 SV=2	P34537|BRE1_CAEEL	97 kDa		12		7	17
	TRUE	Empty	Probable signal recognition particle subunit SRP68 OS=Caenorhabditis elegans OX=6239 GN=srpa-68 PE=3 SV=2	Q20822|SRP68_CAEEL	71 kDa		14		13	16
	TRUE	Empty	Probable 2-oxoglutarate dehydrogenase E1 component DHKTD1 homolog, mitochondrial OS=Caenorhabditis elegans OX=6239 GN=ogdh-2 PE=3 SV=4	Q23629|DHTK1_CAEEL	103 kDa		14		13	18
	TRUE	Empty	Nuclear RNA export factor 1 OS=Caenorhabditis elegans OX=6239 GN=nxf-1 PE=1 SV=1	Q9XVS7|NXF1_CAEEL	71 kDa		13		17	17
	TRUE	Empty	Probable protein disulfide-isomerase A4 OS=Caenorhabditis elegans OX=6239 GN=C14B9.2 PE=3 SV=2	P34329|PDIA4_CAEEL	70 kDa		14		7	19
	TRUE	Empty	Alpha-catenin-like protein hmp-1 OS=Caenorhabditis elegans OX=6239 GN=hmp-1 PE=1 SV=2	P90947|HMP1_CAEEL	104 kDa		13		12	19
	TRUE	Empty	Transcription elongation factor SPT5 OS=Caenorhabditis elegans OX=6239 GN=spt-5 PE=3 SV=3	Q21338|SPT5H_CAEEL	133 kDa		14		11	15
	TRUE	Empty	Probable electron transfer flavoprotein subunit alpha, mitochondrial OS=Caenorhabditis elegans OX=6239 GN=F27D4.1 PE=3 SV=2	Q93615|ETFA_CAEEL	34 kDa		11		26	17
	TRUE	Empty	Probable 3-hydroxyisobutyrate dehydrogenase, mitochondrial OS=Caenorhabditis elegans OX=6239 GN=B0250.5 PE=3 SV=1	Q9XTI0|3HIDH_CAEEL	31 kDa		17		20	15
	TRUE	Empty	Peptidyl-prolyl cis-trans isomerase 3 OS=Caenorhabditis elegans OX=6239 GN=cyn-3 PE=1 SV=1	P52011|CYP3_CAEEL	19 kDa	TRUE	12		18	19
	TRUE	Empty	Probable glutathione S-transferase 7 OS=Caenorhabditis elegans OX=6239 GN=gst-7 PE=3 SV=1	P91253|GST7_CAEEL	23 kDa		9		10	17
	TRUE	Empty	Integrin-linked protein kinase homolog pat-4 OS=Caenorhabditis elegans OX=6239 GN=pat-4 PE=1 SV=1	Q9TZC4|ILKH_CAEEL	52 kDa		20		6	18
	TRUE	Empty	ATP-dependent 6-phosphofructokinase 1 OS=Caenorhabditis elegans OX=6239 GN=pfk-1.1 PE=3 SV=2	Q9TZL8|PFKA1_CAEEL	90 kDa		21		20	15
	TRUE	Empty	Glycogen synthase kinase-3 OS=Caenorhabditis elegans OX=6239 GN=gsk-3 PE=1 SV=1	Q9U2Q9|GSK3_CAEEL	41 kDa		19		17	17
	TRUE	Empty	60S ribosomal protein L35 OS=Caenorhabditis elegans OX=6239 GN=rpl-35 PE=3 SV=1	P34662|RL35_CAEEL	14 kDa		15		16	17
	TRUE	Empty	Eukaryotic translation initiation factor 5 OS=Caenorhabditis elegans OX=6239 GN=C37C3.2 PE=3 SV=2	Q22918|IF5_CAEEL	49 kDa		12		14	13
	TRUE	Empty	2-oxoisovalerate dehydrogenase subunit alpha, mitochondrial OS=Caenorhabditis elegans OX=6239 GN=bckd-1A PE=1 SV=2	O45924|ODBA_CAEEL	49 kDa		14		22	15
	TRUE	Empty	Nucleoporin SEH1 OS=Caenorhabditis elegans OX=6239 GN=npp-18 PE=3 SV=1	O45933|SEH1_CAEEL	42 kDa		12		17	16
	TRUE	Empty	Eukaryotic translation initiation factor 3 subunit G OS=Caenorhabditis elegans OX=6239 GN=eif-3.G PE=3 SV=2	Q19706|EIF3G_CAEEL	30 kDa		19		15	15
	TRUE	Empty	ATP-dependent RNA helicase A OS=Caenorhabditis elegans OX=6239 GN=rha-1 PE=2 SV=3	Q22307|DHX9_CAEEL	144 kDa		9		15	13
	TRUE	Empty	Casein kinase II subunit alpha OS=Caenorhabditis elegans OX=6239 GN=kin-3 PE=1 SV=1	P18334|CSK2A_CAEEL	42 kDa		12		18	16
	TRUE	Empty	Apoptosis-linked gene 2-interacting protein X 1 OS=Caenorhabditis elegans OX=6239 GN=alx-1 PE=2 SV=3	P34552|ALXA_CAEEL	98 kDa		9		13	17
	TRUE	Empty	Leucine carboxyl methyltransferase 1 OS=Caenorhabditis elegans OX=6239 GN=lcmt-1 PE=3 SV=1	P46554|LCMT1_CAEEL	38 kDa		17		18	13
	TRUE	Empty	Rho-associated protein kinase let-502 OS=Caenorhabditis elegans OX=6239 GN=let-502 PE=1 SV=1	P92199|ROCK_CAEEL	136 kDa		6		15	10
	TRUE	Empty	Eukaryotic translation initiation factor 3 subunit I OS=Caenorhabditis elegans OX=6239 GN=eif-3.I PE=3 SV=2	Q965S8|EIF3I_CAEEL	37 kDa		14		18	17
	TRUE	Empty	Intermediate filament protein ifb-2 OS=Caenorhabditis elegans OX=6239 GN=ifb-2 PE=1 SV=1	Q19286|IFB2_CAEEL	62 kDa	TRUE	19		1	21
	TRUE	Empty	Dihydropyrimidinase 1 OS=Caenorhabditis elegans OX=6239 GN=dhp-1 PE=1 SV=2	Q21773|DHP1_CAEEL	54 kDa	TRUE	20		0	24
	TRUE	Empty	32 kDa beta-galactoside-binding lectin OS=Caenorhabditis elegans OX=6239 GN=lec-1 PE=1 SV=1	P36573|LEC1_CAEEL	32 kDa		15		12	17
	TRUE	Empty	Cathepsin B-like cysteine proteinase 6 OS=Caenorhabditis elegans OX=6239 GN=cpr-6 PE=1 SV=1	P43510|CPR6_CAEEL	42 kDa		5		22	18
	TRUE	Empty	Cullin-2 OS=Caenorhabditis elegans OX=6239 GN=cul-2 PE=1 SV=3	Q17390|CUL2_CAEEL	98 kDa		8		20	13
	TRUE	Empty	Guanyl-specific ribonuclease pgl-1 OS=Caenorhabditis elegans OX=6239 GN=pgl-1 PE=1 SV=1	Q9TZQ3|PGL1_CAEEL	78 kDa	TRUE	3		22	6
	TRUE	Empty	F-actin-capping protein subunit beta OS=Caenorhabditis elegans OX=6239 GN=cap-2 PE=2 SV=1	P34686|CAPZB_CAEEL	31 kDa		17		14	18
	TRUE	Empty	Probable splicing factor, arginine/serine-rich 2 OS=Caenorhabditis elegans OX=6239 GN=rsp-2 PE=3 SV=1	Q23120|RSP2_CAEEL	32 kDa		13		12	16
	TRUE	Empty	Transmembrane GTPase fzo-1 OS=Caenorhabditis elegans OX=6239 GN=fzo-1 PE=3 SV=1	Q23424|FZO1_CAEEL	87 kDa		14		8	14
	TRUE	Empty	40S ribosomal protein S13 OS=Caenorhabditis elegans OX=6239 GN=rps-13 PE=3 SV=2	P51404|RS13_CAEEL	17 kDa		8		12	12
	TRUE	Empty	Importin subunit alpha-2 OS=Caenorhabditis elegans OX=6239 GN=ima-2 PE=1 SV=1	P91276|IMA2_CAEEL	59 kDa		5		35	9
	TRUE	Empty	Cohesin subunit scc-3 OS=Caenorhabditis elegans OX=6239 GN=scc-3 PE=1 SV=1	Q19555|SCC3_CAEEL	125 kDa		12		12	16
	TRUE	Empty	Argonaute protein wago-1 OS=Caenorhabditis elegans OX=6239 GN=wago-1 PE=1 SV=1	Q21770|WAGO1_CAEEL	105 kDa		9		22	6
	TRUE	Empty	40S ribosomal protein S27 OS=Caenorhabditis elegans OX=6239 GN=rps-27 PE=1 SV=3	Q9TXP0|RS27_CAEEL	9 kDa		17		19	17
	TRUE	Empty	60S ribosomal protein L24 OS=Caenorhabditis elegans OX=6239 GN=rpl-24.1 PE=3 SV=1	O01868|RL24_CAEEL	18 kDa		13		14	11
	TRUE	Empty	Putative 6-phosphogluconolactonase OS=Caenorhabditis elegans OX=6239 GN=Y57G11C.3 PE=3 SV=2	O18229|6PGL_CAEEL	30 kDa		12		17	11
	TRUE	Empty	cGMP-dependent protein kinase egl-4 OS=Caenorhabditis elegans OX=6239 GN=egl-4 PE=1 SV=2	O76360|EGL4_CAEEL	87 kDa		18		9	13
	TRUE	Empty	Lipid droplet localized protein OS=Caenorhabditis elegans OX=6239 GN=ldp-1 PE=1 SV=1	Q9GZE9|LDP1_CAEEL	47 kDa		14		17	13
	TRUE	Empty	Palmitoyl-protein thioesterase 1 OS=Caenorhabditis elegans OX=6239 GN=ppt-1 PE=2 SV=2	Q20390|PPT1_CAEEL	34 kDa		18		7	21
	TRUE	Empty	Probable isocitrate dehydrogenase [NAD] subunit beta, mitochondrial OS=Caenorhabditis elegans OX=6239 GN=idhb-1 PE=3 SV=1	Q93353|IDH3B_CAEEL	42 kDa		15		13	17
	TRUE	Empty	COP9 signalosome complex subunit 1 OS=Caenorhabditis elegans OX=6239 GN=csn-1 PE=1 SV=1	Q9GS00|CSN1_CAEEL	68 kDa		9		20	13
	TRUE	Empty	Mitotic checkpoint serine/threonine-protein kinase bub-1 OS=Caenorhabditis elegans OX=6239 GN=bub-1 PE=1 SV=1	Q21776|BUB1_CAEEL	112 kDa		0		38	4
	TRUE	Empty	Acidic leucine-rich nuclear phosphoprotein 32-related protein 2 OS=Caenorhabditis elegans OX=6239 GN=T19H12.2 PE=3 SV=1	O01615|AN322_CAEEL	24 kDa	TRUE	10		15	13
	TRUE	Empty	Uncharacterized protein F54F2.2, isoform a OS=Caenorhabditis elegans OX=6239 GN=F54F2.2/F54F2.3/F54F2.4 PE=4 SV=2	P34447|YM2A_CAEEL	92 kDa		16		5	15
	TRUE	Empty	Laminin-like protein lam-2 OS=Caenorhabditis elegans OX=6239 GN=lam-2 PE=1 SV=3	Q18823|LAM2_CAEEL	181 kDa		5		5	22
	TRUE	Empty	Guanine nucleotide-binding protein-like 3 homolog OS=Caenorhabditis elegans OX=6239 GN=nst-1 PE=3 SV=1	Q21086|GNL3_CAEEL	62 kDa		8		6	19
	TRUE	Empty	Transcription factor dpl-1 OS=Caenorhabditis elegans OX=6239 GN=dpl-1 PE=1 SV=2	Q22703|TFDP1_CAEEL	68 kDa		12		12	14
	TRUE	Empty	UPF0160 protein C27H6.8 OS=Caenorhabditis elegans OX=6239 GN=C27H6.8 PE=3 SV=2	O17606|YK4P_CAEEL	38 kDa		11		14	10
	TRUE	Empty	Sodium/potassium-transporting ATPase subunit beta-1 OS=Caenorhabditis elegans OX=6239 GN=nkb-1 PE=1 SV=1	Q93235|AT1B1_CAEEL	37 kDa	TRUE	15		10	12
	TRUE	Empty	COP9 signalosome complex subunit 3 OS=Caenorhabditis elegans OX=6239 GN=csn-3 PE=1 SV=4	Q9N425|CSN3_CAEEL	56 kDa		7		15	13
	TRUE	Empty	Serine/threonine-protein phosphatase 4 catalytic subunit 1 OS=Caenorhabditis elegans OX=6239 GN=pph-4.1 PE=1 SV=1	Q9XW79|PP4C1_CAEEL	37 kDa	TRUE	8		18	17
	TRUE	Empty	Muscle M-line assembly protein unc-89 OS=Caenorhabditis elegans OX=6239 GN=unc-89 PE=1 SV=3	O01761|UNC89_CAEEL	894 kDa		6		0	2
	TRUE	Empty	Aminopeptidase ltah-1.1 OS=Caenorhabditis elegans OX=6239 GN=ltah-1.1 PE=1 SV=1	G5EFT4|AMP1_CAEEL	68 kDa		4		14	12
	TRUE	Empty	Dihydrolipoyl dehydrogenase, mitochondrial OS=Caenorhabditis elegans OX=6239 GN=dld-1 PE=3 SV=2	O17953|DLDH_CAEEL	53 kDa		10		22	14
	TRUE	Empty	Superoxide dismutase [Cu-Zn] OS=Caenorhabditis elegans OX=6239 GN=sod-1 PE=1 SV=2	P34697|SODC_CAEEL	19 kDa		16		12	20
	TRUE	Empty	5'-AMP-activated protein kinase catalytic subunit alpha-2 OS=Caenorhabditis elegans OX=6239 GN=aak-2 PE=1 SV=2	Q95ZQ4|AAPK2_CAEEL	70 kDa		12		8	9
	TRUE	Empty	Putative folylpolyglutamate synthase OS=Caenorhabditis elegans OX=6239 GN=F25B5.6 PE=3 SV=1	Q09509|FOLC_CAEEL	56 kDa		23		2	19
	TRUE	Empty	COP9 signalosome complex subunit 2 OS=Caenorhabditis elegans OX=6239 GN=csn-2 PE=1 SV=2	O01422|CSN2_CAEEL	57 kDa		11		15	13
	TRUE	Empty	Mitochondrial 2-oxoglutarate/malate carrier protein OS=Caenorhabditis elegans OX=6239 GN=misc-1 PE=1 SV=2	P90992|M2OM_CAEEL	33 kDa		16		14	9
	TRUE	Empty	SUMO-activating enzyme subunit uba-2 OS=Caenorhabditis elegans OX=6239 GN=uba-2 PE=3 SV=3	Q9NAN1|SAE2_CAEEL	65 kDa		14		14	13
	TRUE	Empty	Retinoblastoma-like protein homolog lin-35 OS=Caenorhabditis elegans OX=6239 GN=lin-35 PE=1 SV=1	G5EDT1|LIN35_CAEEL	111 kDa		7		6	9
	TRUE	Empty	Uncharacterized protein ZK1073.1 OS=Caenorhabditis elegans OX=6239 GN=ZK1073.1 PE=3 SV=1	O02485|YDJ1_CAEEL	36 kDa		16		4	15
	TRUE	Empty	Pyruvate dehydrogenase E1 component subunit beta, mitochondrial OS=Caenorhabditis elegans OX=6239 GN=pdhb-1 PE=1 SV=2	O44451|ODPB_CAEEL	38 kDa		14		18	12
	TRUE	Empty	Probable protein phosphatase 2C F42G9.1 OS=Caenorhabditis elegans OX=6239 GN=F42G9.1 PE=3 SV=2	P49595|PP2C1_CAEEL	53 kDa		10		12	15
	TRUE	Empty	Probable methylmalonate-semialdehyde dehydrogenase [acylating], mitochondrial OS=Caenorhabditis elegans OX=6239 GN=alh-8 PE=3 SV=1	P52713|MMSA_CAEEL	56 kDa		10		13	14
	TRUE	Empty	Microtubule-associated protein homolog maph-1.1 OS=Caenorhabditis elegans OX=6239 GN=maph-1.1 PE=1 SV=1	P91859|MAP11_CAEEL	92 kDa		11		11	17
	TRUE	Empty	GTP-binding protein cgp-1 OS=Caenorhabditis elegans OX=6239 GN=cgp-1 PE=2 SV=2	Q18905|CGP1_CAEEL	68 kDa		12		9	11
	TRUE	Empty	Eukaryotic translation initiation factor 3 subunit F OS=Caenorhabditis elegans OX=6239 GN=eif-3.F PE=3 SV=1	Q18967|EIF3F_CAEEL	33 kDa		16		14	16
	TRUE	Empty	Myotubularin-related protein 3 OS=Caenorhabditis elegans OX=6239 GN=mtm-3 PE=1 SV=2	Q22712|MTMR3_CAEEL	114 kDa		2		22	3
	TRUE	Empty	Serine hydroxymethyltransferase OS=Caenorhabditis elegans OX=6239 GN=mel-32 PE=1 SV=2	P50432|GLYC_CAEEL	56 kDa		1		17	20
	TRUE	Empty	Synaptojanin OS=Caenorhabditis elegans OX=6239 GN=unc-26 PE=1 SV=1	G5ECL2|SYNJ_CAEEL	124 kDa		9	0	8	9
	TRUE	Empty	Serine/threonine-protein kinase mrck-1 OS=Caenorhabditis elegans OX=6239 GN=mrck-1 PE=2 SV=3	O01583|MRCK_CAEEL	181 kDa		11	0	4	9
	TRUE	Empty	60S acidic ribosomal protein P2 OS=Caenorhabditis elegans OX=6239 GN=C37A2.7 PE=3 SV=2	O01504|RLA2_CAEEL	11 kDa	TRUE	13		19	15
	TRUE	Empty	Eukaryotic translation initiation factor 3 subunit E OS=Caenorhabditis elegans OX=6239 GN=eif-3.E PE=3 SV=1	O61820|EIF3E_CAEEL	51 kDa		10		18	9
	TRUE	Empty	Probable methylcrotonoyl-CoA carboxylase beta chain, mitochondrial OS=Caenorhabditis elegans OX=6239 GN=F02A9.10 PE=3 SV=1	P34385|MCCB_CAEEL	67 kDa	TRUE	12		10	8
	TRUE	Empty	Dolichyl-diphosphooligosaccharide--protein glycosyltransferase subunit stt-3 OS=Caenorhabditis elegans OX=6239 GN=stt-3 PE=1 SV=1	P46975|STT3_CAEEL	85 kDa		8		10	13
	TRUE	Empty	WD repeat-containing protein 48 homolog OS=Caenorhabditis elegans OX=6239 GN=wdr-48 PE=1 SV=2	Q20059|WDR48_CAEEL	77 kDa		13		14	13
	TRUE	Empty	L-2-hydroxyglutarate dehydrogenase, mitochondrial OS=Caenorhabditis elegans OX=6239 GN=Y45G12B.3 PE=3 SV=2	Q9N4Z0|L2HDH_CAEEL	48 kDa		17		13	11
	TRUE	Empty	Acyl-CoA dehydrogenase family member 11 OS=Caenorhabditis elegans OX=6239 GN=acdh-11 PE=1 SV=1	Q9XWZ2|ACD11_CAEEL	68 kDa		1		24	10
	TRUE	Empty	Protein zwilch homolog OS=Caenorhabditis elegans OX=6239 GN=zwl-1 PE=1 SV=1	Q95XP9|ZWILC_CAEEL	71 kDa		1		31	4
	TRUE	Empty	Acetolactate synthase-like protein OS=Caenorhabditis elegans OX=6239 GN=T26C12.1 PE=3 SV=2	O61856|ILVBL_CAEEL	69 kDa		14		13	8
	TRUE	Empty	Protein smg-8 OS=Caenorhabditis elegans OX=6239 GN=smg-8 PE=1 SV=3	O62301|SMG8_CAEEL	100 kDa		4		15	12
	TRUE	Empty	Probable enoyl-CoA hydratase, mitochondrial OS=Caenorhabditis elegans OX=6239 GN=ech-6 PE=3 SV=1	P34559|ECHM_CAEEL	31 kDa		8		17	12
	TRUE	Empty	Succinate--CoA ligase [ADP/GDP-forming] subunit alpha, mitochondrial OS=Caenorhabditis elegans OX=6239 GN=sucl-1 PE=3 SV=1	P53596|SUCA_CAEEL	34 kDa		15		12	15
	TRUE	Empty	Huntington interacting protein related 1 OS=Caenorhabditis elegans OX=6239 GN=hipr-1 PE=3 SV=3	Q02328|SLAP2_CAEEL	104 kDa		12		12	9
	TRUE	Empty	Eukaryotic translation initiation factor 2A OS=Caenorhabditis elegans OX=6239 GN=eif-2A PE=3 SV=2	Q19052|EIF2A_CAEEL	64 kDa		10		14	13
	TRUE	Empty	Laminin-like protein epi-1 OS=Caenorhabditis elegans OX=6239 GN=epi-1 PE=1 SV=1	Q21313|EPI1_CAEEL	404 kDa		4		4	12
	TRUE	Empty	Probable actin-related protein 2/3 complex subunit 2 OS=Caenorhabditis elegans OX=6239 GN=arx-4 PE=3 SV=1	Q8WTM6|ARPC2_CAEEL	34 kDa		6		18	11
	TRUE	Empty	Caveolin-1 OS=Caenorhabditis elegans OX=6239 GN=cav-1 PE=2 SV=1	Q94051|CAV1_CAEEL	26 kDa		12		17	15
	TRUE	Empty	DNA-directed RNA polymerases I, II, and III subunit RPABC1 OS=Caenorhabditis elegans OX=6239 GN=rpb-5 PE=3 SV=1	Q9N5K2|RPAB1_CAEEL	24 kDa		14		10	15
	TRUE	Empty	Histone H3 OS=Caenorhabditis elegans OX=6239 GN=his-2 PE=1 SV=4	P08898|H3_CAEEL	15 kDa		7		4	4
	TRUE	Empty	Probable manganese-transporting ATPase catp-8 OS=Caenorhabditis elegans OX=6239 GN=catp-8 PE=3 SV=3	P90747|AT131_CAEEL	132 kDa		9		9	7
	TRUE	Empty	DNA damage-binding protein 1 OS=Caenorhabditis elegans OX=6239 GN=ddb-1 PE=1 SV=2	Q21554|DDB1_CAEEL	126 kDa		7		13	7
	TRUE	Empty	Ras-related protein Rab-10 OS=Caenorhabditis elegans OX=6239 GN=rab-10 PE=1 SV=2	Q94148|RAB10_CAEEL	23 kDa	TRUE	13		10	12
	TRUE	Empty	28S ribosomal protein S7, mitochondrial OS=Caenorhabditis elegans OX=6239 GN=mrps-7 PE=3 SV=2	Q95Q11|RT07_CAEEL	26 kDa		11		15	10
	TRUE	Empty	Nicotinate phosphoribosyltransferase OS=Caenorhabditis elegans OX=6239 GN=nprt-1 PE=3 SV=3	Q95XX1|PNCB_CAEEL	63 kDa		11		8	8
	TRUE	Empty	V-type proton ATPase subunit C OS=Caenorhabditis elegans OX=6239 GN=vha-11 PE=2 SV=1	Q9XXU9|VATC_CAEEL	43 kDa		7		8	17
	TRUE	Empty	Twitchin OS=Caenorhabditis elegans OX=6239 GN=unc-22 PE=1 SV=3	Q23551|UNC22_CAEEL	789 kDa		7		2	0
	TRUE	Empty	Serine/threonine-protein phosphatase 2A regulatory subunit pptr-1 OS=Caenorhabditis elegans OX=6239 GN=pptr-1 PE=1 SV=4	O18178|2A51_CAEEL	62 kDa		11		9	13
	TRUE	Empty	Protein CLASP-2 OS=Caenorhabditis elegans OX=6239 GN=cls-2 PE=1 SV=3	P32744|CLAS2_CAEEL	112 kDa		8		11	12
	TRUE	Empty	60S ribosomal protein L15 OS=Caenorhabditis elegans OX=6239 GN=rpl-15 PE=3 SV=1	P91374|RL15_CAEEL	24 kDa		7		14	9
	TRUE	Empty	RNA-binding protein rnp-1 OS=Caenorhabditis elegans OX=6239 GN=rnp-1 PE=2 SV=1	Q10667|RNP1_CAEEL	33 kDa		14		12	11
	TRUE	Empty	Uncharacterized protein T27F2.1 OS=Caenorhabditis elegans OX=6239 GN=T27F2.1 PE=1 SV=1	Q22836|YGH1_CAEEL	60 kDa		6		6	14
	TRUE	Empty	Protein dif-1 OS=Caenorhabditis elegans OX=6239 GN=dif-1 PE=2 SV=1	Q27257|DIF1_CAEEL	33 kDa		15		12	15
	TRUE	Empty	COP9 signalosome complex subunit 4 OS=Caenorhabditis elegans OX=6239 GN=csn-4 PE=1 SV=1	Q9N359|CSN4_CAEEL	46 kDa		8		15	13
	TRUE	Empty	Ribonucleoside-diphosphate reductase small chain OS=Caenorhabditis elegans OX=6239 GN=rnr-2 PE=3 SV=1	P42170|RIR2_CAEEL	44 kDa		0		32	2
	TRUE	Empty	Uridine 5'-monophosphate synthase OS=Caenorhabditis elegans OX=6239 GN=umps-1 PE=1 SV=1	G5EDZ2|UMPS_CAEEL	55 kDa		6		12	11
	TRUE	Empty	Nuclear cap-binding protein subunit 1 OS=Caenorhabditis elegans OX=6239 GN=ncbp-1 PE=3 SV=3	O01763|NCBP1_CAEEL	93 kDa		12		8	14
	TRUE	Empty	Putative H/ACA ribonucleoprotein complex subunit 4 OS=Caenorhabditis elegans OX=6239 GN=K01G5.5 PE=3 SV=1	O17919|DKC1_CAEEL	50 kDa		5		10	15
	TRUE	Empty	Putative aldehyde dehydrogenase family 7 member A1 homolog OS=Caenorhabditis elegans OX=6239 GN=alh-9 PE=3 SV=2	P46562|AL7A1_CAEEL	57 kDa		13		7	13
	TRUE	Empty	Chromosome condensation protein dpy-27 OS=Caenorhabditis elegans OX=6239 GN=dpy-27 PE=1 SV=1	P48996|DPY27_CAEEL	170 kDa		4		6	4
	TRUE	Empty	40S ribosomal protein S12 OS=Caenorhabditis elegans OX=6239 GN=rps-12 PE=3 SV=2	P49196|RS12_CAEEL	15 kDa		8		16	12
	TRUE	Empty	Succinate dehydrogenase [ubiquinone] iron-sulfur subunit, mitochondrial OS=Caenorhabditis elegans OX=6239 GN=sdhb-1 PE=2 SV=1	Q09545|SDHB_CAEEL	33 kDa		11		10	7
	TRUE	Empty	Zinc finger protein lin-13 OS=Caenorhabditis elegans OX=6239 GN=lin-13 PE=2 SV=2	Q11107|LIN13_CAEEL	253 kDa		9		10	5
	TRUE	Empty	SUMO-activating enzyme subunit aos-1 OS=Caenorhabditis elegans OX=6239 GN=aos-1 PE=3 SV=1	Q17820|SAE1_CAEEL	39 kDa		13		13	13
	TRUE	Empty	Serine/threonine-protein kinase akt-1 OS=Caenorhabditis elegans OX=6239 GN=akt-1 PE=1 SV=2	Q17941|AKT1_CAEEL	62 kDa		10		13	9
	TRUE	Empty	Ufm1-specific protease OS=Caenorhabditis elegans OX=6239 GN=odr-8 PE=1 SV=1	Q94218|UFSP_CAEEL	67 kDa		8		20	9
	TRUE	Empty	Intermediate filament protein ifb-1 OS=Caenorhabditis elegans OX=6239 GN=ifb-1 PE=1 SV=1	Q19289|IFB1_CAEEL	67 kDa	TRUE	8		1	15
	TRUE	Empty	SWI/SNF-related matrix-associated actin-dependent regulator of chromatin subfamily A containing DEAD/H box 1 homolog OS=Caenorhabditis elegans OX=6239 GN=M03C11.8 PE=3 SV=1	G5EDG2|SMRCD_CAEEL	113 kDa		9		14	11
	TRUE	Empty	Glutathione peroxidase 2 OS=Caenorhabditis elegans OX=6239 GN=gpx-2 PE=3 SV=1	O62327|GPX2_CAEEL	18 kDa	TRUE	10		9	10
	TRUE	Empty	Uncharacterized protein C05D11.1 OS=Caenorhabditis elegans OX=6239 GN=C05D11.1 PE=4 SV=2	P48053|YPD1_CAEEL	111 kDa		10		11	11
	TRUE	Empty	Probable protein phosphatase 2C T23F11.1 OS=Caenorhabditis elegans OX=6239 GN=ppm-2 PE=3 SV=2	P49596|PP2C2_CAEEL	39 kDa		17		9	12
	TRUE	Empty	Proteasome subunit alpha type-6 OS=Caenorhabditis elegans OX=6239 GN=pas-1 PE=1 SV=1	O17586|PSA6_CAEEL	27 kDa		9		12	14
	TRUE	Empty	Tubulin gamma chain OS=Caenorhabditis elegans OX=6239 GN=tbg-1 PE=2 SV=1	P34475|TBG_CAEEL	50 kDa		9		15	10
	TRUE	Empty	Ubiquitin conjugation factor E4 ufd-2 OS=Caenorhabditis elegans OX=6239 GN=ufd-2 PE=1 SV=2	Q09349|UBE4_CAEEL	114 kDa		6		9	6
	TRUE	Empty	WD repeat and FYVE domain-containing protein 2 OS=Caenorhabditis elegans OX=6239 GN=wdfy-2 PE=1 SV=1	Q18964|WDFY2_CAEEL	46 kDa		9		13	12
	TRUE	Empty	Nuclear pore complex protein 5 OS=Caenorhabditis elegans OX=6239 GN=npp-5 PE=1 SV=1	Q19131|NPP5_CAEEL	92 kDa		3		13	7
	TRUE	Empty	cAMP-dependent protein kinase regulatory subunit OS=Caenorhabditis elegans OX=6239 GN=kin-2 PE=1 SV=3	P30625|KAPR_CAEEL	41 kDa		15		2	16
	TRUE	Empty	Lon protease homolog, mitochondrial OS=Caenorhabditis elegans OX=6239 GN=lonp-1 PE=3 SV=1	O44952|LONM_CAEEL	108 kDa		5		12	10
	TRUE	Empty	Probable 40S ribosomal protein S9, mitochondrial OS=Caenorhabditis elegans OX=6239 GN=mrps-9 PE=3 SV=2	P34388|RT09_CAEEL	44 kDa		5		14	9
	TRUE	Empty	Importin subunit alpha-3 OS=Caenorhabditis elegans OX=6239 GN=ima-3 PE=1 SV=2	Q19969|IMA3_CAEEL	56 kDa		8		11	12
	TRUE	Empty	RNA polymerase II subunit A C-terminal domain phosphatase OS=Caenorhabditis elegans OX=6239 GN=fcp-1 PE=1 SV=2	Q95QG8|FCP1_CAEEL	74 kDa		12		13	13
	TRUE	Empty	5'-3' exoribonuclease 2 homolog OS=Caenorhabditis elegans OX=6239 GN=xrn-2 PE=1 SV=2	Q9U299|XRN2_CAEEL	110 kDa		11		6	9
	TRUE	Empty	Condensin complex subunit 1 OS=Caenorhabditis elegans OX=6239 GN=dpy-28 PE=1 SV=2	Q9U2M1|CND1_CAEEL	171 kDa		5		11	9
	TRUE	Empty	Pumilio domain-containing protein 12 OS=Caenorhabditis elegans OX=6239 GN=puf-12 PE=4 SV=1	Q09622|PUF12_CAEEL	87 kDa		12		2	11
	TRUE	Empty	Spindle apparatus protein lin-5 OS=Caenorhabditis elegans OX=6239 GN=lin-5 PE=1 SV=2	P45970|LIN5_CAEEL	93 kDa		0		27	1
	TRUE	Empty	Protein F37C4.5 OS=Caenorhabditis elegans OX=6239 GN=F37C4.5 PE=1 SV=3	O44400|F37C4_CAEEL	61 kDa		5		15	9
	TRUE	Empty	Coatomer subunit epsilon OS=Caenorhabditis elegans OX=6239 GN=cope-1 PE=3 SV=1	O62246|COPE_CAEEL	33 kDa		12		5	13
	TRUE	Empty	Histone H2A OS=Caenorhabditis elegans OX=6239 GN=his-3 PE=1 SV=2	P09588|H2A_CAEEL	13 kDa	TRUE	5		6	10
	TRUE	Empty	COP9 signalosome complex subunit 5 OS=Caenorhabditis elegans OX=6239 GN=csn-5 PE=1 SV=1	P91001|CSN5_CAEEL	41 kDa		6		12	13
	TRUE	Empty	Probable DNA polymerase delta small subunit OS=Caenorhabditis elegans OX=6239 GN=F12F6.7 PE=3 SV=1	Q19366|DPOD2_CAEEL	50 kDa		6		12	8
	TRUE	Empty	Chromodomain-helicase-DNA-binding protein 3 homolog OS=Caenorhabditis elegans OX=6239 GN=chd-3 PE=2 SV=2	Q22516|CHD3_CAEEL	205 kDa	TRUE	6		5	10
	TRUE	Empty	tRNA (guanine-N(7)-)-methyltransferase OS=Caenorhabditis elegans OX=6239 GN=W02B12.10 PE=3 SV=1	Q23126|TRMB_CAEEL	30 kDa		6		11	7
	TRUE	Empty	UDP-glucose 4-epimerase OS=Caenorhabditis elegans OX=6239 GN=gale-1 PE=1 SV=1	Q564Q1|GALE_CAEEL	38 kDa		11		7	16
	TRUE	Empty	Proteasome subunit alpha type-5 OS=Caenorhabditis elegans OX=6239 GN=pas-5 PE=1 SV=1	Q95008|PSA5_CAEEL	27 kDa		6		16	12
	TRUE	Empty	COP9 signalosome complex subunit 6 OS=Caenorhabditis elegans OX=6239 GN=csn-6 PE=1 SV=1	Q95PZ0|CSN6_CAEEL	48 kDa		9		14	9
	TRUE	Empty	Target of rapamycin homolog OS=Caenorhabditis elegans OX=6239 GN=let-363 PE=2 SV=3	Q95Q95|TOR_CAEEL	307 kDa		7		8	5
	TRUE	Empty	Probable phosphomannomutase OS=Caenorhabditis elegans OX=6239 GN=F52B11.2 PE=3 SV=2	Q9XUE6|PMM_CAEEL	29 kDa		9		9	9
	TRUE	Empty	Serine/threonine-protein kinase plk-1 OS=Caenorhabditis elegans OX=6239 GN=plk-1 PE=1 SV=3	P34331|PLK1_CAEEL	74 kDa	TRUE	0		29	1
	TRUE	Empty	Guanyl-specific ribonuclease pgl-3 OS=Caenorhabditis elegans OX=6239 GN=pgl-3 PE=1 SV=1	G5EBV6|PGL3_CAEEL	75 kDa	TRUE	5		18	7
	TRUE	Empty	Peptidyl-prolyl cis-trans isomerase 7 OS=Caenorhabditis elegans OX=6239 GN=cyn-7 PE=1 SV=2	P52015|CYP7_CAEEL	18 kDa	TRUE	8		13	11
	TRUE	Empty	Actin-depolymerizing factor 2, isoform c OS=Caenorhabditis elegans OX=6239 GN=unc-60 PE=1 SV=1	Q07749|ADF2_CAEEL	17 kDa	TRUE	14		6	13
	TRUE	Empty	DIS3-like exonuclease 2 OS=Caenorhabditis elegans OX=6239 GN=disl-2 PE=1 SV=2	Q09568|DI3L2_CAEEL	97 kDa		5		14	4
	TRUE	Empty	Probable ubiquitin carboxyl-terminal hydrolase K02C4.3 OS=Caenorhabditis elegans OX=6239 GN=K02C4.3 PE=3 SV=3	Q09931|UBPY_CAEEL	145 kDa		4		16	10
	TRUE	Empty	Protein DDI1 homolog 1 OS=Caenorhabditis elegans OX=6239 GN=ddi-1 PE=1 SV=2	Q17569|DDI1_CAEEL	44 kDa		9		12	10
	TRUE	Empty	GDP-mannose 4,6 dehydratase 1 OS=Caenorhabditis elegans OX=6239 GN=bre-1 PE=1 SV=3	Q18801|GMD1_CAEEL	44 kDa		14		3	17
	TRUE	Empty	Stomatin-1 OS=Caenorhabditis elegans OX=6239 GN=sto-1 PE=3 SV=2	Q19200|STO1_CAEEL	36 kDa	TRUE	9		7	12
	TRUE	Empty	Dihydrolipoyllysine-residue acetyltransferase component of pyruvate dehydrogenase complex, mitochondrial OS=Caenorhabditis elegans OX=6239 GN=dlat-1 PE=1 SV=1	Q19749|ODP2_CAEEL	53 kDa		8		12	12
	TRUE	Empty	Eukaryotic translation initiation factor 2 subunit 2 OS=Caenorhabditis elegans OX=6239 GN=K04G2.1 PE=3 SV=4	Q21230|IF2B_CAEEL	28 kDa		7		13	9
	TRUE	Empty	Double-stranded RNA-specific adenosine deaminase adr-2 OS=Caenorhabditis elegans OX=6239 GN=adr-2 PE=1 SV=2	Q22618|DSRAD_CAEEL	55 kDa		9		7	8
	TRUE	Empty	Proteasome subunit alpha type-7 OS=Caenorhabditis elegans OX=6239 GN=pas-4 PE=1 SV=1	Q95005|PSA7_CAEEL	28 kDa		8		16	12
	TRUE	Empty	Serine/threonine-protein phosphatase 5 OS=Caenorhabditis elegans OX=6239 GN=pph-5 PE=1 SV=2	Q9NES8|PPP5_CAEEL	56 kDa		7		12	9
	TRUE	Empty	FACT complex subunit ssrp1-B OS=Caenorhabditis elegans OX=6239 GN=hmg-3 PE=3 SV=1	O01683|SSP1B_CAEEL	78 kDa	TRUE	3		17	3
	TRUE	Empty	Prolyl 4-hydroxylase subunit alpha-2 OS=Caenorhabditis elegans OX=6239 GN=phy-2 PE=1 SV=1	Q20065|P4HA2_CAEEL	62 kDa		8		2	20
	TRUE	Empty	Cyclin-dependent kinase 1 OS=Caenorhabditis elegans OX=6239 GN=cdk-1 PE=1 SV=1	P34556|CDK1_CAEEL	38 kDa	TRUE	2		23	3
	TRUE	Empty	Serine/threonine-protein phosphatase 6 regulatory subunit OS=Caenorhabditis elegans OX=6239 GN=saps-1 PE=1 SV=1	B2D6K9|PPH6R_CAEEL	87 kDa		5		13	7
	TRUE	Empty	Nuclear protein localization protein 4 homolog 1 OS=Caenorhabditis elegans OX=6239 GN=npl-4.1 PE=1 SV=1	H2KYU6|NPL41_CAEEL	60 kDa		8		13	12
	TRUE	Empty	ATPase asna-1 OS=Caenorhabditis elegans OX=6239 GN=asna-1 PE=1 SV=1	P30632|ASNA_CAEEL	38 kDa		6		10	9
	TRUE	Empty	B-box type zinc finger protein ncl-1 OS=Caenorhabditis elegans OX=6239 GN=ncl-1 PE=2 SV=1	P34611|NCL1_CAEEL	92 kDa		10		8	11
	TRUE	Empty	FACT complex subunit SSRP1-A OS=Caenorhabditis elegans OX=6239 GN=hmg-4 PE=3 SV=1	P41848|SSP1A_CAEEL	79 kDa	TRUE	6		9	10
	TRUE	Empty	Retinoblastoma-binding protein homolog 5 OS=Caenorhabditis elegans OX=6239 GN=rbbp-5 PE=3 SV=3	Q09309|RBBP5_CAEEL	51 kDa		10		8	9
	TRUE	Empty	Protein npp-24 OS=Caenorhabditis elegans OX=6239 GN=npp-24 PE=4 SV=2	Q09372|NPP24_CAEEL	74 kDa		6		12	6
	TRUE	Orange	Innexin-3 OS=Caenorhabditis elegans OX=6239 GN=inx-3 PE=1 SV=2	Q19746|INX3_CAEEL	49 kDa		15		8	8
	TRUE	Empty	40S ribosomal protein S23 OS=Caenorhabditis elegans OX=6239 GN=rps-23 PE=3 SV=1	Q19877|RS23_CAEEL	16 kDa		10		10	9
	TRUE	Empty	Dual specificity mitogen-activated protein kinase kinase mek-1 OS=Caenorhabditis elegans OX=6239 GN=mek-1 PE=1 SV=2	Q21307|MEK1_CAEEL	39 kDa		9		13	6
	TRUE	Empty	Nitric oxide synthase-interacting protein homolog OS=Caenorhabditis elegans OX=6239 GN=R05G6.4 PE=3 SV=1	Q21755|NOSIP_CAEEL	34 kDa		5		7	14
	TRUE	Empty	Eukaryotic translation initiation factor 3 subunit K OS=Caenorhabditis elegans OX=6239 GN=eif-3.K PE=2 SV=1	Q9XUP3|EIF3K_CAEEL	27 kDa		7		9	10
	TRUE	Empty	Homogentisate 1,2-dioxygenase OS=Caenorhabditis elegans OX=6239 GN=hgo-1 PE=2 SV=2	Q9Y041|HGD_CAEEL	49 kDa		14		4	12
	TRUE	Empty	DNA repair protein rad-50 OS=Caenorhabditis elegans OX=6239 GN=rad-50 PE=2 SV=1	O44199|RAD50_CAEEL	150 kDa		1		10	1
	TRUE	Empty	Pleckstrin homology domain-containing family D member 1 OS=Caenorhabditis elegans OX=6239 GN=F31D4.5 PE=3 SV=2	O45420|PLHD1_CAEEL	66 kDa		4		1	18
	TRUE	Empty	E3 ubiquitin-protein ligase listerin OS=Caenorhabditis elegans OX=6239 GN=Y54E10A.11 PE=3 SV=1	Q65XX2|LTN1_CAEEL	165 kDa		1		11	3
	TRUE	Empty	Bifunctional L-3-cyanoalanine synthase/cysteine synthase OS=Caenorhabditis elegans OX=6239 GN=cysl-2 PE=1 SV=1	O45679|CYSK2_CAEEL	36 kDa	TRUE	12		4	17
	TRUE	Empty	Guanine nucleotide-binding protein subunit beta-1 OS=Caenorhabditis elegans OX=6239 GN=gpb-1 PE=1 SV=2	P17343|GBB1_CAEEL	37 kDa		10		9	12
	TRUE	Empty	Dolichyl-diphosphooligosaccharide--protein glycosyltransferase 48 kDa subunit OS=Caenorhabditis elegans OX=6239 GN=ostb-1 PE=3 SV=1	P45971|OST48_CAEEL	49 kDa		5		13	11
	TRUE	Empty	Uncharacterized protein F31E3.4 OS=Caenorhabditis elegans OX=6239 GN=F31E3.4 PE=4 SV=1	P53015|YPO4_CAEEL	127 kDa		10		6	10
	TRUE	Empty	28S ribosomal protein S17, mitochondrial OS=Caenorhabditis elegans OX=6239 GN=mrps-17 PE=3 SV=2	Q11189|RT17_CAEEL	18 kDa		7		10	10
	TRUE	Empty	60S ribosomal protein L31 OS=Caenorhabditis elegans OX=6239 GN=rpl-31 PE=3 SV=1	Q9U332|RL31_CAEEL	14 kDa		11		8	9
	TRUE	Empty	Probable cytochrome c-type heme lyase OS=Caenorhabditis elegans OX=6239 GN=cchl-1 PE=3 SV=1	P53703|CCHL_CAEEL	31 kDa		2		13	11
	TRUE	Empty	Anaphase-promoting complex subunit 1 OS=Caenorhabditis elegans OX=6239 GN=mat-2 PE=1 SV=3	O18191|APC1_CAEEL	170 kDa		0		13	3
	TRUE	Empty	Troponin T OS=Caenorhabditis elegans OX=6239 GN=mup-2 PE=2 SV=1	Q27371|TNNT_CAEEL	47 kDa		12			10
	TRUE	Empty	Protein cbp-1 OS=Caenorhabditis elegans OX=6239 GN=cbp-1 PE=1 SV=6	P34545|CBP1_CAEEL	222 kDa		4	0	5	8
	TRUE	Empty	Transcription factor unc-37 OS=Caenorhabditis elegans OX=6239 GN=unc-37 PE=1 SV=1	O02482|UNC37_CAEEL	66 kDa		9		9	10
	TRUE	Empty	Eukaryotic translation initiation factor 3 subunit D OS=Caenorhabditis elegans OX=6239 GN=eif-3.D PE=1 SV=1	P30642|EIF3D_CAEEL	64 kDa		5		14	14
	TRUE	Empty	Putative pseudouridine synthase B0024.11 OS=Caenorhabditis elegans OX=6239 GN=B0024.11 PE=3 SV=1	Q17426|YQ4B_CAEEL	65 kDa		8		9	10
	TRUE	Empty	Probable NADH dehydrogenase [ubiquinone] flavoprotein 2, mitochondrial OS=Caenorhabditis elegans OX=6239 GN=F53F4.10 PE=3 SV=1	Q20719|NDUV2_CAEEL	26 kDa		4		13	13
	TRUE	Empty	Ribosomal protein S6 kinase beta OS=Caenorhabditis elegans OX=6239 GN=rsks-1 PE=1 SV=2	Q9NAH6|KS6B_CAEEL	60 kDa		14		6	10
	TRUE	Empty	UBX domain-containing protein 1 OS=Caenorhabditis elegans OX=6239 GN=ubxn-1 PE=1 SV=1	Q9TXH9|UBXN1_CAEEL	33 kDa		10		7	8
	TRUE	Empty	RNA-binding protein asd-2 OS=Caenorhabditis elegans OX=6239 GN=asd-2 PE=1 SV=1	G5EFF1|ASD2_CAEEL	48 kDa		9		2	14
	TRUE	Empty	JNK-interacting protein OS=Caenorhabditis elegans OX=6239 GN=unc-16 PE=1 SV=3	P34609|JIP_CAEEL	130 kDa		11		0	11
	TRUE	Empty	Polyglutamine-repeat protein pqn-41 OS=Caenorhabditis elegans OX=6239 GN=pqn-41 PE=1 SV=2	C7IVR4|PQN41_CAEEL	230 kDa		10		9	10
	TRUE	Empty	Signal transducing adapter molecule 1 OS=Caenorhabditis elegans OX=6239 GN=stam-1 PE=1 SV=2	O01498|STAM1_CAEEL	51 kDa		9		10	13
	TRUE	Empty	Probable signal peptidase complex subunit 3 OS=Caenorhabditis elegans OX=6239 GN=K12H4.4 PE=1 SV=1	P34525|SPCS3_CAEEL	21 kDa		4		7	11
	TRUE	Empty	Probable succinyl-CoA:3-ketoacid coenzyme A transferase, mitochondrial OS=Caenorhabditis elegans OX=6239 GN=C05C10.3 PE=3 SV=1	Q09450|SCOT_CAEEL	56 kDa		15		8	6
	TRUE	Empty	Ras-like GTP-binding protein rhoA OS=Caenorhabditis elegans OX=6239 GN=rho-1 PE=1 SV=1	Q22038|RHO1_CAEEL	22 kDa		11		7	9
	TRUE	Empty	ATP-dependent RNA helicase glh-2 OS=Caenorhabditis elegans OX=6239 GN=glh-2 PE=1 SV=1	Q966L9|GLH2_CAEEL	100 kDa	TRUE	7		13	6
	TRUE	Empty	Hydroxyacid-oxoacid transhydrogenase, mitochondrial OS=Caenorhabditis elegans OX=6239 GN=hphd-1 PE=3 SV=1	Q9U2M4|HOT_CAEEL	51 kDa		16		2	6
	TRUE	Empty	Rootletin OS=Caenorhabditis elegans OX=6239 GN=che-10 PE=2 SV=2	Q09EF7|CROCC_CAEEL	230 kDa		4		2	3
	TRUE	Empty	Zinc finger protein ZPR1 homolog OS=Caenorhabditis elegans OX=6239 GN=W03F9.1 PE=3 SV=2	O16999|ZPR1_CAEEL	51 kDa		5		12	7
	TRUE	Empty	Enoyl-[acyl-carrier-protein] reductase, mitochondrial OS=Caenorhabditis elegans OX=6239 GN=W09H1.5 PE=3 SV=1	O45903|MECR1_CAEEL	38 kDa		7		7	8
	TRUE	Empty	N-alpha-acetyltransferase daf-31 OS=Caenorhabditis elegans OX=6239 GN=daf-31 PE=2 SV=1	O61219|DAF31_CAEEL	21 kDa		7		9	9
	TRUE	Empty	Protein lap1 OS=Caenorhabditis elegans OX=6239 GN=let-413 PE=1 SV=3	O61967|LAP1_CAEEL	77 kDa		14		5	11
	TRUE	Empty	Histone H1.1 OS=Caenorhabditis elegans OX=6239 GN=his-24 PE=1 SV=4	P10771|H11_CAEEL	21 kDa	TRUE	8		8	13
	TRUE	Empty	Probable glutathione reductase 2 OS=Caenorhabditis elegans OX=6239 GN=trxr-2 PE=3 SV=2	P30635|TRXR2_CAEEL	55 kDa		7		6	7
	TRUE	Empty	CCR4-NOT transcription complex subunit 7 OS=Caenorhabditis elegans OX=6239 GN=ccf-1 PE=2 SV=1	Q17345|CNOT7_CAEEL	34 kDa		9		9	10
	TRUE	Empty	MICOS complex subunit MIC60-1 OS=Caenorhabditis elegans OX=6239 GN=immt-1 PE=2 SV=2	Q22505|IMMT1_CAEEL	76 kDa		5		5	8
	TRUE	Empty	Nuclear anchorage protein 1 OS=Caenorhabditis elegans OX=6239 GN=anc-1 PE=1 SV=3	Q9N4M4|ANC1_CAEEL	957 kDa		4		1	7
	TRUE	Empty	Alkyldihydroxyacetonephosphate synthase OS=Caenorhabditis elegans OX=6239 GN=ads-1 PE=2 SV=1	O45218|ADAS_CAEEL	67 kDa		11		0	10
	TRUE	Empty	Regulator of nonsense transcripts 1 OS=Caenorhabditis elegans OX=6239 GN=smg-2 PE=1 SV=1	O76512|RENT1_CAEEL	120 kDa		3		13	9
	TRUE	Empty	Uncharacterized GTP-binding protein C02F5.3 OS=Caenorhabditis elegans OX=6239 GN=C02F5.3 PE=3 SV=2	P34280|YKK3_CAEEL	41 kDa		7		9	6
	TRUE	Empty	CID domain-containing protein 1 OS=Caenorhabditis elegans OX=6239 GN=cids-1 PE=4 SV=2	P34281|CIDS1_CAEEL	36 kDa		6		5	12
	TRUE	Empty	Protein phosphatase 1 regulatory subunit SDS22 homolog OS=Caenorhabditis elegans OX=6239 GN=sds-22 PE=3 SV=1	P45969|SDS22_CAEEL	37 kDa		8		7	9
	TRUE	Empty	Protein clpf-1 OS=Caenorhabditis elegans OX=6239 GN=clpf-1 PE=1 SV=2	P52874|CLP1_CAEEL	48 kDa		5		10	6
	TRUE	Empty	Protein unc-33 OS=Caenorhabditis elegans OX=6239 GN=unc-33 PE=2 SV=1	Q01630|UNC33_CAEEL	91 kDa		7		3	8
	TRUE	Empty	Probable adenylate kinase isoenzyme ZK673.2 OS=Caenorhabditis elegans OX=6239 GN=ZK673.2 PE=3 SV=1	Q09629|KADY_CAEEL	25 kDa		5		11	8
	TRUE	Empty	Translocon-associated protein subunit beta OS=Caenorhabditis elegans OX=6239 GN=trap-2 PE=1 SV=1	Q22169|SSRB_CAEEL	22 kDa		10		9	11
	TRUE	Empty	Probable signal peptidase complex subunit 2 OS=Caenorhabditis elegans OX=6239 GN=hpo-21 PE=3 SV=1	Q9XWW1|SPCS2_CAEEL	21 kDa		8		8	8
	TRUE	Empty	Proteasome subunit alpha type-1 OS=Caenorhabditis elegans OX=6239 GN=pas-6 PE=1 SV=1	O44156|PSA1_CAEEL	28 kDa		3		9	9
	TRUE	Empty	Helicase ssl-1 OS=Caenorhabditis elegans OX=6239 GN=ssl-1 PE=2 SV=4	Q9NEL2|SSL1_CAEEL	269 kDa		1		7	2
	TRUE	Empty	CWF19-like protein 1 homolog OS=Caenorhabditis elegans OX=6239 GN=F17A9.2 PE=3 SV=2	O16216|C19L1_CAEEL	59 kDa		7		4	6
	TRUE	Empty	Transcription initiation factor IIB OS=Caenorhabditis elegans OX=6239 GN=ttb-1 PE=3 SV=2	O16991|TF2B_CAEEL	33 kDa		10		5	9
	TRUE	Empty	Replication factor C subunit 4 OS=Caenorhabditis elegans OX=6239 GN=rfc-4 PE=1 SV=1	P53016|RFC4_CAEEL	38 kDa		5		10	7
	TRUE	Empty	Ubiquitin-like modifier-activating enzyme 5 OS=Caenorhabditis elegans OX=6239 GN=uba-5 PE=1 SV=1	P91430|UBA5_CAEEL	47 kDa		6		6	6
	TRUE	Empty	Cytochrome c oxidase subunit 6A, mitochondrial OS=Caenorhabditis elegans OX=6239 GN=cox-6A PE=3 SV=1	Q20779|COX6A_CAEEL	15 kDa		6		5	13
	TRUE	Empty	Integrin beta pat-3 OS=Caenorhabditis elegans OX=6239 GN=pat-3 PE=1 SV=1	Q27874|PAT3_CAEEL	90 kDa		10		9	8
	TRUE	Empty	AP-2 complex subunit mu OS=Caenorhabditis elegans OX=6239 GN=dpy-23 PE=2 SV=2	P35603|AP2M_CAEEL	50 kDa		5		2	6
	TRUE	Empty	Kinesin light chain OS=Caenorhabditis elegans OX=6239 GN=klc-2 PE=1 SV=2	P46822|KLC_CAEEL	60 kDa		5		2	14
	TRUE	Empty	Electron transfer flavoprotein-ubiquinone oxidoreductase, mitochondrial OS=Caenorhabditis elegans OX=6239 GN=let-721 PE=3 SV=2	Q11190|ETFD_CAEEL	65 kDa		2		8	10
	TRUE	Empty	Endoribonuclease dcr-1 OS=Caenorhabditis elegans OX=6239 GN=dcr-1 PE=1 SV=3	P34529|DCR1_CAEEL	218 kDa		5		8	2
	TRUE	Empty	Nuclear hormone receptor family member nhr-49 OS=Caenorhabditis elegans OX=6239 GN=nhr-49 PE=1 SV=2	O45666|NHR49_CAEEL	55 kDa		5		10	11
	TRUE	Empty	Putative 39S ribosomal protein L3, mitochondrial OS=Caenorhabditis elegans OX=6239 GN=mrps-18C PE=3 SV=3	P49404|RM03_CAEEL	45 kDa		5		4	8
	TRUE	Empty	Glutathione-independent glyoxalase DJR-1.1 OS=Caenorhabditis elegans OX=6239 GN=djr-1.1 PE=1 SV=1	P90994|DJ11_CAEEL	20 kDa		8		12	10
	TRUE	Empty	Serine palmitoyltransferase 1 OS=Caenorhabditis elegans OX=6239 GN=sptl-1 PE=3 SV=1	P91079|SPTC1_CAEEL	52 kDa		8		6	9
	TRUE	Empty	Probable [pyruvate dehydrogenase (acetyl-transferring)] kinase, mitochondrial OS=Caenorhabditis elegans OX=6239 GN=pdhk-2 PE=3 SV=1	Q02332|PDHK2_CAEEL	45 kDa		10		11	4
	TRUE	Empty	Probable histone deacetylase complex subunit SAP18 OS=Caenorhabditis elegans OX=6239 GN=C16C10.4 PE=3 SV=1	Q09250|SAP18_CAEEL	19 kDa		6		5	6
	TRUE	Empty	28S ribosomal protein S31, mitochondrial OS=Caenorhabditis elegans OX=6239 GN=mrps-31 PE=3 SV=2	Q09261|RT31_CAEEL	43 kDa		5		11	5
	TRUE	Empty	Probable exosome complex exonuclease RRP44 OS=Caenorhabditis elegans OX=6239 GN=dis-3 PE=3 SV=2	Q17632|RRP44_CAEEL	109 kDa		7		3	3
	TRUE	Empty	Apyrase apy-1 OS=Caenorhabditis elegans OX=6239 GN=apy-1 PE=1 SV=2	Q19202|APY1_CAEEL	40 kDa		9		6	10
	TRUE	Empty	Uncharacterized protein F21D5.5 OS=Caenorhabditis elegans OX=6239 GN=F21D5.5 PE=2 SV=2	Q19683|YZR5_CAEEL	46 kDa		7		8	8
	TRUE	Empty	Protein PAT1 homolog 1 OS=Caenorhabditis elegans OX=6239 GN=patr-1 PE=3 SV=2	Q20374|PATR1_CAEEL	94 kDa		7		11	8
	TRUE	Empty	Aspartic protease 4 OS=Caenorhabditis elegans OX=6239 GN=asp-4 PE=2 SV=1	Q21966|ASP4_CAEEL	49 kDa		6		11	9
	TRUE	Empty	Serine/threonine-protein kinase par-1 OS=Caenorhabditis elegans OX=6239 GN=par-1 PE=1 SV=1	Q9TW45|PAR1_CAEEL	126 kDa		7		4	11
	TRUE	Empty	ATPase family AAA domain-containing protein 3 OS=Caenorhabditis elegans OX=6239 GN=atad-3 PE=1 SV=2	Q20748|ATAD3_CAEEL	67 kDa		3		11	9
	TRUE	Empty	DNA ligase 1 OS=Caenorhabditis elegans OX=6239 GN=lig-1 PE=3 SV=2	Q27474|DNLI1_CAEEL	86 kDa		2		13	4
	TRUE	Empty	Tubulin alpha-3 chain OS=Caenorhabditis elegans OX=6239 GN=mec-12 PE=1 SV=1	P91910|TBA3_CAEEL	50 kDa	TRUE	10		3	10
	TRUE	Empty	Mannose-1-phosphate guanyltransferase beta OS=Caenorhabditis elegans OX=6239 GN=tag-335 PE=3 SV=1	A3QMC8|GMPPB_CAEEL	40 kDa		6		8	7
	TRUE	Empty	Tyrosine-protein phosphatase non-receptor type ptp-2 OS=Caenorhabditis elegans OX=6239 GN=ptp-2 PE=1 SV=1	G5EC24|PTP2_CAEEL	77 kDa		6		5	6
	TRUE	Empty	Condensin complex subunit capg-1 OS=Caenorhabditis elegans OX=6239 GN=capg-1 PE=1 SV=1	G5EFJ4|CAPG1_CAEEL	131 kDa		4		6	7
	TRUE	Empty	26S proteasome non-ATPase regulatory subunit 4 OS=Caenorhabditis elegans OX=6239 GN=rpn-10 PE=2 SV=2	O61742|PSMD4_CAEEL	37 kDa		5		12	7
	TRUE	Empty	Probable DNA replication complex GINS protein PSF2 OS=Caenorhabditis elegans OX=6239 GN=psf-2 PE=3 SV=1	O62193|PSF2_CAEEL	20 kDa		5		8	8
	TRUE	Empty	Ribosomal protein L44, mitochondrial OS=Caenorhabditis elegans OX=6239 GN=mrpl-44 PE=3 SV=3	P34384|RM44_CAEEL	44 kDa	TRUE	5		6	9
	TRUE	Empty	Putative tricarboxylate transport protein, mitochondrial OS=Caenorhabditis elegans OX=6239 GN=K11H3.3 PE=3 SV=1	P34519|TXTP_CAEEL	34 kDa		9		6	5
	TRUE	Empty	F-actin-capping protein subunit alpha OS=Caenorhabditis elegans OX=6239 GN=cap-1 PE=2 SV=1	P34685|CAPZA_CAEEL	32 kDa		7		7	9
	TRUE	Empty	Peptidyl-prolyl cis-trans isomerase 1 OS=Caenorhabditis elegans OX=6239 GN=cyn-1 PE=2 SV=1	P52009|CYP1_CAEEL	21 kDa	TRUE	7		10	9
	TRUE	Empty	Serine/threonine-protein phosphatase Pgam5, mitochondrial OS=Caenorhabditis elegans OX=6239 GN=pgam-5 PE=3 SV=2	Q09422|PGAM5_CAEEL	32 kDa		3		9	5
	TRUE	Empty	Ubiquitin fusion degradation protein 1 homolog OS=Caenorhabditis elegans OX=6239 GN=ufd-1 PE=1 SV=1	Q19584|UFD1_CAEEL	37 kDa		5		14	7
	TRUE	Empty	Translational repressor ifet-1 OS=Caenorhabditis elegans OX=6239 GN=ifet-1 PE=1 SV=2	Q20898|IFET1_CAEEL	84 kDa		3		14	5
	TRUE	Empty	Ubiquitin-like protease 2 OS=Caenorhabditis elegans OX=6239 GN=ulp-2 PE=1 SV=2	Q23238|ULP2_CAEEL	102 kDa		8		5	5
	TRUE	Empty	Lipoamide acyltransferase component of branched-chain alpha-keto acid dehydrogenase complex, mitochondrial OS=Caenorhabditis elegans OX=6239 GN=dbt-1 PE=2 SV=1	Q23571|ODB2_CAEEL	50 kDa		7		7	6
	TRUE	Empty	Protein HIRA OS=Caenorhabditis elegans OX=6239 GN=hira-1 PE=3 SV=2	Q09589|HIRA_CAEEL	103 kDa		2		12	3
	TRUE	Empty	Eukaryotic translation initiation factor 5A-2 OS=Caenorhabditis elegans OX=6239 GN=iff-2 PE=2 SV=1	Q20751|IF5A2_CAEEL	18 kDa	TRUE	12		3	10
	TRUE	Empty	MICOS complex subunit MIC60-2 OS=Caenorhabditis elegans OX=6239 GN=immt-2 PE=2 SV=2	Q9XXN2|IMMT2_CAEEL	73 kDa		1		12	3
	TRUE	Empty	Serine/threonine kinase NLK OS=Caenorhabditis elegans OX=6239 GN=lit-1 PE=1 SV=1	Q9U9Y8|NLK_CAEEL	72 kDa		7	0	8	10
	TRUE	Empty	Ubiquinone biosynthesis monooxygenase COQ6, mitochondrial OS=Caenorhabditis elegans OX=6239 GN=coq-6 PE=3 SV=2	O01884|COQ6_CAEEL	49 kDa		9		9	9
	TRUE	Empty	Putative thiosulfate sulfurtransferase mpst-1 OS=Caenorhabditis elegans OX=6239 GN=mpst-1 PE=3 SV=1	O17730|THT2_CAEEL	37 kDa		5		8	6
	TRUE	Empty	MO25-like protein 2 OS=Caenorhabditis elegans OX=6239 GN=mop-25.2 PE=3 SV=1	O18211|MO25M_CAEEL	39 kDa		5		8	6
	TRUE	Empty	40S ribosomal protein S26 OS=Caenorhabditis elegans OX=6239 GN=rps-26 PE=3 SV=1	O45499|RS26_CAEEL	13 kDa		6		6	8
	TRUE	Empty	Probable replication factor C subunit 5 OS=Caenorhabditis elegans OX=6239 GN=F44B9.8 PE=3 SV=3	P34429|RFC5_CAEEL	41 kDa		5		8	5
	TRUE	Empty	Anamorsin homolog OS=Caenorhabditis elegans OX=6239 GN=T20B12.7 PE=3 SV=1	P41847|DRE2_CAEEL	26 kDa		5		8	12
	TRUE	Empty	ATP synthase subunit delta, mitochondrial OS=Caenorhabditis elegans OX=6239 GN=F58F12.1 PE=1 SV=1	Q09544|ATPD_CAEEL	17 kDa		6		9	8
	TRUE	Empty	Probable cytochrome P450 CYP44 OS=Caenorhabditis elegans OX=6239 GN=cyp-44A1 PE=3 SV=2	Q09660|CC44_CAEEL	56 kDa		6		4	5
	TRUE	Empty	Eukaryotic translation initiation factor 4E-2 OS=Caenorhabditis elegans OX=6239 GN=ife-2 PE=1 SV=1	Q21693|IF4E2_CAEEL	26 kDa	TRUE	6		7	7
	TRUE	Empty	39S ribosomal protein L51, mitochondrial OS=Caenorhabditis elegans OX=6239 GN=mrpl-51 PE=3 SV=1	Q22438|RM51_CAEEL	24 kDa		7		5	6
	TRUE	Empty	SUMO-conjugating enzyme UBC9 OS=Caenorhabditis elegans OX=6239 GN=ubc-9 PE=1 SV=1	Q95017|UBC9_CAEEL	19 kDa		6		9	9
	TRUE	Empty	Putative neurobeachin homolog OS=Caenorhabditis elegans OX=6239 GN=sel-2 PE=2 SV=3	Q19317|NBEA_CAEEL	281 kDa		10		2	7
	TRUE	Empty	Histone-lysine N-methyltransferase set-26 OS=Caenorhabditis elegans OX=6239 GN=set-26 PE=1 SV=3	Q9U263|SET26_CAEEL	182 kDa	TRUE	5		1	6
	TRUE	Empty	Tat-binding homolog 7 OS=Caenorhabditis elegans OX=6239 GN=lex-1 PE=1 SV=3	P54816|TBP7_CAEEL	146 kDa		1		11	3
	TRUE	Empty	Calcium/calmodulin-dependent protein kinase type II OS=Caenorhabditis elegans OX=6239 GN=unc-43 PE=1 SV=2	O62305|KCC2D_CAEEL	80 kDa		11			10
	TRUE	Empty	Peptidyl-prolyl cis-trans isomerase 5 OS=Caenorhabditis elegans OX=6239 GN=cyn-5 PE=1 SV=2	P52013|CYP5_CAEEL	22 kDa	TRUE	6		5	6
	TRUE	Empty	Putative transcription elongation factor S-II OS=Caenorhabditis elegans OX=6239 GN=T24H10.1 PE=3 SV=1	P52652|TFS2_CAEEL	35 kDa		8		7	8
	TRUE	Empty	Probable ornithine aminotransferase, mitochondrial OS=Caenorhabditis elegans OX=6239 GN=oatr-1 PE=3 SV=3	Q18040|OAT_CAEEL	46 kDa		9		11	7
	TRUE	Empty	Mitochondrial import receptor subunit TOM40 homolog OS=Caenorhabditis elegans OX=6239 GN=tomm-40 PE=2 SV=1	Q18090|TOM40_CAEEL	32 kDa		6		7	10
	TRUE	Empty	Aspartyl aminopeptidase OS=Caenorhabditis elegans OX=6239 GN=dnpp-1 PE=1 SV=1	Q19087|DNPEP_CAEEL	51 kDa		3		5	11
	TRUE	Empty	60S ribosomal protein L28 OS=Caenorhabditis elegans OX=6239 GN=rpl-28 PE=1 SV=3	Q21930|RL28_CAEEL	14 kDa		5		9	8
	TRUE	Empty	Ubiquitin carboxyl-terminal hydrolase cyk-3 OS=Caenorhabditis elegans OX=6239 GN=cyk-3 PE=1 SV=1	Q8WT44|UBPH_CAEEL	134 kDa		5		10	4
	TRUE	Empty	Endonuclease G, mitochondrial OS=Caenorhabditis elegans OX=6239 GN=cps-6 PE=1 SV=1	Q95NM6|NUCG_CAEEL	35 kDa		9		5	6
	TRUE	Empty	Guanine nucleotide-binding protein alpha-16 subunit OS=Caenorhabditis elegans OX=6239 GN=gpa-16 PE=1 SV=3	Q9N2V6|GPA16_CAEEL	41 kDa	TRUE	5		11	7
	TRUE	Empty	Probable lysine-specific histone demethylase 1 OS=Caenorhabditis elegans OX=6239 GN=spr-5 PE=1 SV=1	Q9XWP6|LSD1_CAEEL	86 kDa		4		8	6
	TRUE	Empty	Myotubularin-related protein 9 OS=Caenorhabditis elegans OX=6239 GN=mtm-9 PE=1 SV=1	Q965W9|MTMR9_CAEEL	65 kDa		3		7	6
	TRUE	Empty	Phenylalanine-4-hydroxylase OS=Caenorhabditis elegans OX=6239 GN=pah-1 PE=1 SV=2	P90925|PH4H_CAEEL	52 kDa		10		0	8
	TRUE	Empty	Nucleolar GTP-binding protein 1 OS=Caenorhabditis elegans OX=6239 GN=nog-1 PE=1 SV=1	O44411|NOG1_CAEEL	78 kDa		9		4	9
	TRUE	Empty	60S ribosomal protein L23a 1 OS=Caenorhabditis elegans OX=6239 GN=rpl-25.1 PE=3 SV=1	P48162|R23A1_CAEEL	17 kDa	TRUE	6		3	12
	TRUE	Empty	60S ribosomal protein L36 OS=Caenorhabditis elegans OX=6239 GN=rpl-36 PE=1 SV=3	P49181|RL36_CAEEL	12 kDa		3		10	9
	TRUE	Empty	Very-long-chain 3-oxooacyl-coA reductase let-767 OS=Caenorhabditis elegans OX=6239 GN=let-767 PE=1 SV=2	Q09517|LE767_CAEEL	34 kDa	TRUE	7		9	10
	TRUE	Empty	Thioredoxin domain-containing protein 9 OS=Caenorhabditis elegans OX=6239 GN=txdc-9 PE=2 SV=1	Q11183|TXND9_CAEEL	24 kDa		4		11	5
	TRUE	Empty	E3 UFM1-protein ligase 1 homolog OS=Caenorhabditis elegans OX=6239 GN=ufl-1 PE=3 SV=1	Q17750|UFL1_CAEEL	81 kDa		8		3	6
	TRUE	Empty	Transcription factor BTF3 homolog OS=Caenorhabditis elegans OX=6239 GN=icd-1 PE=1 SV=1	Q18885|BTF3_CAEEL	18 kDa		4		8	12
	TRUE	Empty	Elongation factor Ts, mitochondrial OS=Caenorhabditis elegans OX=6239 GN=tsfm-1 PE=2 SV=1	Q20819|EFTS_CAEEL	34 kDa		7		3	8
	TRUE	Empty	Probable elongator complex protein 3 OS=Caenorhabditis elegans OX=6239 GN=elpc-3 PE=3 SV=2	Q23651|ELP3_CAEEL	62 kDa		3		9	5
	TRUE	Empty	Reticulon-4-interacting protein 1, mitochondrial OS=Caenorhabditis elegans OX=6239 GN=rad-8 PE=2 SV=2	Q4W4Z2|RT4I1_CAEEL	40 kDa		6		5	6
	TRUE	Empty	Probable very-long-chain enoyl-CoA reductase art-1 OS=Caenorhabditis elegans OX=6239 GN=art-1 PE=3 SV=1	Q9N5Y2|TECR_CAEEL	35 kDa		8		8	5
	TRUE	Empty	Membrane-associated protein gex-3 OS=Caenorhabditis elegans OX=6239 GN=gex-3 PE=1 SV=2	P55163|GEX3_CAEEL	130 kDa		7		2	9
	TRUE	Empty	Flap endonuclease 1 OS=Caenorhabditis elegans OX=6239 GN=crn-1 PE=1 SV=1	Q9N3T2|FEN1_CAEEL	43 kDa		1		9	8
	TRUE	Empty	Serine/threonine-protein phosphatase 2B catalytic subunit OS=Caenorhabditis elegans OX=6239 GN=tax-6 PE=1 SV=2	Q0G819|PP2B_CAEEL	62 kDa		10		2	9
	TRUE	Empty	Intermediate filament protein ifa-4 OS=Caenorhabditis elegans OX=6239 GN=ifa-4 PE=1 SV=3	P90900|IFA4_CAEEL	66 kDa	TRUE	11		0	6
	TRUE	Empty	Paired amphipathic helix protein sin-3 OS=Caenorhabditis elegans OX=6239 GN=sin-3 PE=2 SV=1	A5JYW9|SIN3_CAEEL	172 kDa		1		11	3
	TRUE	Empty	Uncharacterized protein C53C9.2 OS=Caenorhabditis elegans OX=6239 GN=C53C9.2 PE=3 SV=2	Q09936|YSE2_CAEEL	45 kDa		14		0	6
	TRUE	Empty	Tubulin beta-4 chain OS=Caenorhabditis elegans OX=6239 GN=tbb-4 PE=3 SV=1	P41937|TBB4_CAEEL	50 kDa	TRUE	11	2	3	7
	TRUE	Empty	Tar DNA-binding protein homolog 1 OS=Caenorhabditis elegans OX=6239 GN=tdp-1 PE=1 SV=1	D0VWM8|TADBP_CAEEL	46 kDa		9		4	9
	TRUE	Empty	Probable pre-mRNA-splicing factor ATP-dependent RNA helicase mog-4 OS=Caenorhabditis elegans OX=6239 GN=mog-4 PE=1 SV=2	O45244|DHX16_CAEEL	114 kDa	TRUE	4		8	7
	TRUE	Empty	Serine/threonine-protein kinase RIO3 OS=Caenorhabditis elegans OX=6239 GN=riok-3 PE=2 SV=1	P34649|RIOK3_CAEEL	59 kDa		3		3	5
	TRUE	Empty	Dual specificity mitogen-activated protein kinase kinase mek-2 OS=Caenorhabditis elegans OX=6239 GN=mek-2 PE=1 SV=1	Q10664|MEK2_CAEEL	43 kDa		6		6	4
	TRUE	Empty	NEDD8-activating enzyme E1 regulatory subunit OS=Caenorhabditis elegans OX=6239 GN=ula-1 PE=3 SV=2	Q18217|ULA1_CAEEL	61 kDa		6		8	7
	TRUE	Empty	Bromodomain-containing protein bet-1 OS=Caenorhabditis elegans OX=6239 GN=bet-1 PE=1 SV=3	Q95Y80|BET1_CAEEL	94 kDa		6		3	7
	TRUE	Empty	Lariat debranching enzyme OS=Caenorhabditis elegans OX=6239 GN=dbr-1 PE=3 SV=2	Q966M6|DBR1_CAEEL	57 kDa		4		4	5
	TRUE	Empty	Acidic leucine-rich nuclear phosphoprotein 32-related protein 1 OS=Caenorhabditis elegans OX=6239 GN=F33H2.3 PE=3 SV=1	O62220|AN321_CAEEL	25 kDa	TRUE	8		6	7
	TRUE	Empty	GTP-binding protein SAR1 OS=Caenorhabditis elegans OX=6239 GN=ZK180.4 PE=3 SV=1	Q23445|SAR1_CAEEL	22 kDa		4		11	8
	TRUE	Empty	Uncharacterized protein F07F6.4 OS=Caenorhabditis elegans OX=6239 GN=F07F6.4 PE=4 SV=2	Q09531|YQP4_CAEEL	58 kDa		10		2	8
	TRUE	Empty	Cell division cycle protein 23 homolog OS=Caenorhabditis elegans OX=6239 GN=mat-3 PE=1 SV=2	Q19294|CDC23_CAEEL	77 kDa		1		11	4
	TRUE	Empty	Putative acetylcholine regulator unc-18 OS=Caenorhabditis elegans OX=6239 GN=unc-18 PE=2 SV=3	P34815|UNC18_CAEEL	77 kDa		17		1	6
	TRUE	Empty	Structural maintenance of chromosomes protein 5 OS=Caenorhabditis elegans OX=6239 GN=smc-5 PE=1 SV=2	Q18237|SMC5_CAEEL	123 kDa		0		7	1
	TRUE	Empty	Alcohol dehydrogenase 1 OS=Caenorhabditis elegans OX=6239 GN=sodh-1 PE=2 SV=2	Q17334|ADH1_CAEEL	38 kDa		15		0	7
	TRUE	Empty	Liprin-beta OS=Caenorhabditis elegans OX=6239 GN=T21H8.1 PE=2 SV=4	Q94071|LIPB_CAEEL	103 kDa		7		0	10
	TRUE	Empty	Skp1-related protein OS=Caenorhabditis elegans OX=6239 GN=skr-1 PE=1 SV=1	G5ECU1|SKR1_CAEEL	20 kDa		2		6	9
	TRUE	Empty	Non-specific lipid-transfer protein-like 2 OS=Caenorhabditis elegans OX=6239 GN=daf-22 PE=1 SV=1	G5EDP2|NLTP2_CAEEL	44 kDa		8		3	7
	TRUE	Empty	Glutathione S-transferase P OS=Caenorhabditis elegans OX=6239 GN=gst-1 PE=1 SV=1	P10299|GSTP1_CAEEL	24 kDa		5		6	7
	TRUE	Empty	Ras protein let-60 OS=Caenorhabditis elegans OX=6239 GN=let-60 PE=1 SV=1	P22981|LET60_CAEEL	21 kDa		11		4	6
	TRUE	Empty	Ras-related protein ced-10 OS=Caenorhabditis elegans OX=6239 GN=ced-10 PE=1 SV=2	Q03206|RAC1_CAEEL	21 kDa		7		4	6
	TRUE	Empty	Uncharacterized protein C45G9.5 OS=Caenorhabditis elegans OX=6239 GN=C45G9.5 PE=4 SV=1	Q09278|YQI5_CAEEL	36 kDa		7		4	5
	TRUE	Empty	Probable splicing factor, arginine/serine-rich 1 OS=Caenorhabditis elegans OX=6239 GN=rsp-1 PE=3 SV=1	Q23121|RSP1_CAEEL	35 kDa		4		7	9
	TRUE	Empty	Semaphorin-2A OS=Caenorhabditis elegans OX=6239 GN=mab-20 PE=1 SV=1	Q95XP4|SEM2A_CAEEL	73 kDa		7		3	7
	TRUE	Empty	LEM protein 2 OS=Caenorhabditis elegans OX=6239 GN=lem-2 PE=1 SV=1	Q9XTB5|LEM2_CAEEL	55 kDa		3		6	6
	TRUE	Empty	Dolichyl-diphosphooligosaccharide--protein glycosyltransferase subunit 2 OS=Caenorhabditis elegans OX=6239 GN=ostd-1 PE=3 SV=1	P91390|RPN2_CAEEL	31 kDa		4		9	7
	TRUE	Empty	Partitioning defective protein 6 OS=Caenorhabditis elegans OX=6239 GN=par-6 PE=1 SV=2	Q9NAN2|PAR6_CAEEL	34 kDa		3		7	5
	TRUE	Empty	UMP-CMP kinase 1 OS=Caenorhabditis elegans OX=6239 GN=C29F7.3 PE=1 SV=1	O17622|KCY1_CAEEL	21 kDa		10		2	11
	TRUE	Empty	Sex muscle abnormal protein 5 OS=Caenorhabditis elegans OX=6239 GN=sem-5 PE=1 SV=1	P29355|SEM5_CAEEL	26 kDa		3		1	8
	TRUE	Empty	Poly [ADP-ribose] polymerase 1 OS=Caenorhabditis elegans OX=6239 GN=parp-1 PE=1 SV=1	Q9N4H4|PARP1_CAEEL	108 kDa		2		14	3
	TRUE	Empty	Transcription-associated protein 1 OS=Caenorhabditis elegans OX=6239 GN=trr-1 PE=2 SV=1	G5EEV2|TRR1_CAEEL	467 kDa		0		5	0
	TRUE	Empty	Protein lin-14 OS=Caenorhabditis elegans OX=6239 GN=lin-14 PE=1 SV=1	Q21446|LIN14_CAEEL	59 kDa		11		0	9
	TRUE	Empty	Dihydropyrimidinase 2 OS=Caenorhabditis elegans OX=6239 GN=dhp-2 PE=1 SV=1	Q18677|DHP2_CAEEL	56 kDa	TRUE	11		0	5
	TRUE	Empty	Spindle-defective protein 5 OS=Caenorhabditis elegans OX=6239 GN=spd-5 PE=1 SV=2	P91349|SPD5_CAEEL	135 kDa		0		16	0
	TRUE	Empty	Smu-1 suppressor of mec-8 and unc-52 protein OS=Caenorhabditis elegans OX=6239 GN=smu-1 PE=1 SV=1	G5EEG7|SMU1_CAEEL	57 kDa		4		4	6
	TRUE	Empty	Abhydrolase domain-containing protein lid-1 OS=Caenorhabditis elegans OX=6239 GN=lid-1 PE=1 SV=2	O02218|LID1_CAEEL	40 kDa		4		11	4
	TRUE	Empty	Eukaryotic translation initiation factor 4E-3 OS=Caenorhabditis elegans OX=6239 GN=ife-3 PE=1 SV=2	O61955|IF4E3_CAEEL	28 kDa		3		9	3
	TRUE	Empty	Glyceraldehyde-3-phosphate dehydrogenase 2 OS=Caenorhabditis elegans OX=6239 GN=gpd-2 PE=3 SV=2	P17329|G3P2_CAEEL	36 kDa	TRUE	8		6	9
	TRUE	Empty	Putative nudix hydrolase 7 OS=Caenorhabditis elegans OX=6239 GN=ndx-7 PE=3 SV=2	P91148|NDX7_CAEEL	34 kDa		8		5	8
	TRUE	Empty	Proteasome subunit beta type-2 OS=Caenorhabditis elegans OX=6239 GN=pbs-4 PE=3 SV=2	P91477|PSB2_CAEEL	23 kDa		4		6	3
	TRUE	Empty	Uncharacterized protein F33H1.3 OS=Caenorhabditis elegans OX=6239 GN=F33H1.3 PE=4 SV=1	Q09556|YQW3_CAEEL	41 kDa		3		3	7
	TRUE	Empty	Nucleoporin NUP35 OS=Caenorhabditis elegans OX=6239 GN=npp-19 PE=1 SV=2	Q09601|NUP35_CAEEL	41 kDa		6		7	3
	TRUE	Empty	Probable splicing factor, arginine/serine-rich 6 OS=Caenorhabditis elegans OX=6239 GN=rsp-6 PE=3 SV=1	Q18409|RSP6_CAEEL	20 kDa		8		8	6
	TRUE	Empty	Heterogeneous nuclear ribonucleoprotein A1 OS=Caenorhabditis elegans OX=6239 GN=hrp-1 PE=1 SV=1	Q22037|ROA1_CAEEL	36 kDa		3		8	8
	TRUE	Empty	Inosine-5'-monophosphate dehydrogenase OS=Caenorhabditis elegans OX=6239 GN=T22D1.3 PE=3 SV=2	Q9GZH3|IMDH_CAEEL	58 kDa		6		7	3
	TRUE	Empty	Phosphatidate cytidylyltransferase, mitochondrial OS=Caenorhabditis elegans OX=6239 GN=Y71F9B.2 PE=3 SV=2	Q9N4G7|TAM41_CAEEL	37 kDa		6		5	4
	TRUE	Empty	NEDD8-conjugating enzyme ubc-12 OS=Caenorhabditis elegans OX=6239 GN=ubc-12 PE=2 SV=1	Q9XVK5|UBC12_CAEEL	21 kDa		7		6	7
	TRUE	Empty	mRNA cap guanine-N7 methyltransferase OS=Caenorhabditis elegans OX=6239 GN=tag-72 PE=3 SV=2	Q9XVS1|MCES_CAEEL	43 kDa		5		5	6
	TRUE	Empty	FAM172 family protein homolog Y75B8A.31 OS=Caenorhabditis elegans OX=6239 GN=Y75B8A.31 PE=3 SV=1	Q9XW78|F172A_CAEEL	35 kDa		6		12	7
	TRUE	Empty	CRAL-TRIO domain-containing protein T23G5.2 OS=Caenorhabditis elegans OX=6239 GN=T23G5.2 PE=4 SV=3	Q03606|YN02_CAEEL	81 kDa		2		5	7
	TRUE	Empty	Probable NADH dehydrogenase [ubiquinone] iron-sulfur protein 6, mitochondrial OS=Caenorhabditis elegans OX=6239 GN=nduf-6 PE=3 SV=1	Q19724|NDUS6_CAEEL	16 kDa		4		9	9
	TRUE	Empty	14-3-3-like protein 2 OS=Caenorhabditis elegans OX=6239 GN=ftt-2 PE=1 SV=1	Q20655|14332_CAEEL	28 kDa	TRUE	8		5	10
	TRUE	Empty	DNA topoisomerase 1 OS=Caenorhabditis elegans OX=6239 GN=top-1 PE=2 SV=1	O17966|TOP1_CAEEL	94 kDa		6		1	6
	TRUE	Empty	Probable histone-binding protein rba-1 OS=Caenorhabditis elegans OX=6239 GN=rba-1 PE=3 SV=1	P90917|RBA1_CAEEL	47 kDa		1		14	4
	TRUE	Empty	cAMP-dependent protein kinase catalytic subunit OS=Caenorhabditis elegans OX=6239 GN=kin-1 PE=1 SV=3	P21137|KAPC1_CAEEL	46 kDa		16		0	6
	TRUE	Empty	Uncharacterized protein Y92H12BR.3 OS=Caenorhabditis elegans OX=6239 GN=Y92H12BR.3 PE=1 SV=2	Q9BPN8|Y92H3_CAEEL	71 kDa		0		6	6
	TRUE	Empty	N-acetylglucosamine-6-phosphate deacetylase OS=Caenorhabditis elegans OX=6239 GN=F59B2.3 PE=3 SV=1	P34480|NAGA_CAEEL	45 kDa		8		5	8
	TRUE	Empty	Ubiquitin-like protein 1-40S ribosomal protein S27a OS=Caenorhabditis elegans OX=6239 GN=ubl-1 PE=1 SV=2	P37165|RS27A_CAEEL	18 kDa		5		6	6
	TRUE	Empty	Peptidyl-prolyl cis-trans isomerase 11 OS=Caenorhabditis elegans OX=6239 GN=cyn-11 PE=2 SV=1	P52018|CYP11_CAEEL	20 kDa		7		4	5
	TRUE	Empty	Probable oligoribonuclease OS=Caenorhabditis elegans OX=6239 GN=C08B6.8 PE=3 SV=1	Q17819|ORN_CAEEL	22 kDa		5		7	6
	TRUE	Empty	WD repeat-containing protein wdr-5.1 OS=Caenorhabditis elegans OX=6239 GN=wdr-5.1 PE=1 SV=1	Q17963|WDR51_CAEEL	40 kDa		8		5	7
	TRUE	Empty	Ras-related protein Rab-18 OS=Caenorhabditis elegans OX=6239 GN=rab-18 PE=3 SV=1	Q8MXS1|RAB18_CAEEL	23 kDa		7		10	4
	TRUE	Empty	Probable 39S ribosomal protein L19, mitochondrial OS=Caenorhabditis elegans OX=6239 GN=mrpl-19 PE=3 SV=1	Q95Y83|RM19_CAEEL	34 kDa		5		8	7
	TRUE	Empty	Mediator of RNA polymerase II transcription subunit 19 OS=Caenorhabditis elegans OX=6239 GN=mdt-19 PE=3 SV=1	Q9N4F2|MED19_CAEEL	23 kDa		5		7	5
	TRUE	Empty	Serine/threonine-protein kinase max-2 OS=Caenorhabditis elegans OX=6239 GN=max-2 PE=1 SV=1	G5EGQ3|MAX2_CAEEL	71 kDa		2		2	5
	TRUE	Empty	Putative endoplasmic reticulum metallopeptidase 1-A OS=Caenorhabditis elegans OX=6239 GN=B0495.7 PE=1 SV=2	Q09216|ERP1A_CAEEL	102 kDa		2		4	6
	TRUE	Empty	Cell division cycle protein 27 homolog OS=Caenorhabditis elegans OX=6239 GN=mat-1 PE=1 SV=1	Q9N593|CDC27_CAEEL	89 kDa		2		7	3
	TRUE	Empty	Protein mel-28 OS=Caenorhabditis elegans OX=6239 GN=mel-28 PE=1 SV=2	Q18508|MEL28_CAEEL	201 kDa		1		5	3
	TRUE	Empty	Probable pre-mRNA-splicing factor ATP-dependent RNA helicase mog-1 OS=Caenorhabditis elegans OX=6239 GN=mog-1 PE=1 SV=2	P34498|MOG1_CAEEL	129 kDa	TRUE	1		2	1
	TRUE	Empty	Serine/threonine-protein kinase pak-1 OS=Caenorhabditis elegans OX=6239 GN=pak-1 PE=1 SV=2	Q17850|PK1_CAEEL	64 kDa		7		1	4
	TRUE	Empty	Receptor-type guanylate cyclase gcy-6 OS=Caenorhabditis elegans OX=6239 GN=gcy-6 PE=2 SV=1	N1NVB7|GCY6_CAEEL	122 kDa		1		1	2
	TRUE	Empty	Germline survival defective-1 OS=Caenorhabditis elegans OX=6239 GN=gls-1 PE=1 SV=2	Q8I4M5|GLS1_CAEEL	116 kDa		1		13	2
	TRUE	Empty	Gamma-tubulin interacting protein 2 OS=Caenorhabditis elegans OX=6239 GN=gip-2 PE=4 SV=1	G5EF84|GIP2_CAEEL	73 kDa		4		6	5
	TRUE	Empty	Beta-catenin-like protein hmp-2 OS=Caenorhabditis elegans OX=6239 GN=hmp-2 PE=1 SV=1	O44326|HMP2_CAEEL	75 kDa		7		5	10
	TRUE	Empty	Intramembrane protease 2 OS=Caenorhabditis elegans OX=6239 GN=imp-2 PE=1 SV=1	P49049|IMP2_CAEEL	53 kDa		4		8	6
	TRUE	Empty	2-(3-amino-3-carboxypropyl)histidine synthase subunit 1 OS=Caenorhabditis elegans OX=6239 GN=dph-1 PE=3 SV=2	P49958|DPH1_CAEEL	45 kDa		4		9	5
	TRUE	Empty	Proteasome subunit alpha type-3 OS=Caenorhabditis elegans OX=6239 GN=pas-7 PE=1 SV=3	Q09583|PSA3_CAEEL	28 kDa		4		3	7
	TRUE	Empty	Protein arginine methyltransferase NDUFAF7 homolog, mitochondrial OS=Caenorhabditis elegans OX=6239 GN=ZK1128.1 PE=3 SV=4	Q09644|NDUF7_CAEEL	48 kDa		4		3	3
	TRUE	Empty	Kynureninase OS=Caenorhabditis elegans OX=6239 GN=flu-2 PE=2 SV=1	Q18026|KYNU_CAEEL	54 kDa		5		3	8
	TRUE	Empty	6-phosphofructo-2-kinase/fructose-2,6-bisphosphatase OS=Caenorhabditis elegans OX=6239 GN=pfkb-1.2 PE=3 SV=2	Q21122|F2612_CAEEL	52 kDa		4		5	7
	TRUE	Empty	HEAT repeat-containing protein 1 homolog OS=Caenorhabditis elegans OX=6239 GN=toe-1 PE=3 SV=1	Q23495|HEAT1_CAEEL	185 kDa		5		3	6
	TRUE	Empty	Dauer abnormal formation protein 25 OS=Caenorhabditis elegans OX=6239 GN=daf-25 PE=2 SV=2	Q9N3Q8|DAF25_CAEEL	44 kDa		7		3	3
	TRUE	Empty	Probable U2 small nuclear ribonucleoprotein A' OS=Caenorhabditis elegans OX=6239 GN=mog-2 PE=1 SV=1	Q9BLB6|RU2A_CAEEL	29 kDa		2		5	8
	TRUE	Empty	Protein morc-1 OS=Caenorhabditis elegans OX=6239 GN=morc-1 PE=1 SV=2	Q23243|MORC1_CAEEL	96 kDa		2		7	3
	TRUE	Empty	Embryonic developmental protein tofu-6 OS=Caenorhabditis elegans OX=6239 GN=tofu-6 PE=2 SV=2	Q09293|TOFU6_CAEEL	41 kDa		1		13	4
	TRUE	Empty	60S ribosomal protein L38 OS=Caenorhabditis elegans OX=6239 GN=rpl-38 PE=3 SV=2	O17570|RL38_CAEEL	8 kDa		2		5	6
	TRUE	Empty	Pescadillo homolog OS=Caenorhabditis elegans OX=6239 GN=lpd-7 PE=3 SV=1	Q95Y89|PESC_CAEEL	62 kDa		9		1	6
	TRUE	Empty	Poly [ADP-ribose] polymerase tankyrase OS=Caenorhabditis elegans OX=6239 GN=tank-1 PE=2 SV=1	Q9TXQ1|TNKS1_CAEEL	255 kDa		7		0	0
	TRUE	Empty	Uncharacterized protein B0464.6 OS=Caenorhabditis elegans OX=6239 GN=B0464.6 PE=4 SV=2	Q03564|YKD6_CAEEL	73 kDa		0		14	4
	TRUE	Empty	Intermediate filament protein ifp-1 OS=Caenorhabditis elegans OX=6239 GN=ifp-1 PE=3 SV=1	Q09501|IFP1_CAEEL	89 kDa		11		0	4
	TRUE	Empty	Tryptophan 2,3-dioxygenase OS=Caenorhabditis elegans OX=6239 GN=tdo-2 PE=1 SV=1	Q09474|T23O_CAEEL	47 kDa		4		0	7
	TRUE	Empty	Kinetochore protein ndc-80 OS=Caenorhabditis elegans OX=6239 GN=ndc-80 PE=1 SV=2	Q17635|NDC80_CAEEL	69 kDa		0		17	1
	TRUE	Empty	Probable signal recognition particle 19 kDa protein OS=Caenorhabditis elegans OX=6239 GN=F37F2.2 PE=3 SV=4	O61749|SRP19_CAEEL	16 kDa		5		4	6
	TRUE	Empty	2-methoxy-6-polyprenyl-1,4-benzoquinol methylase, mitochondrial OS=Caenorhabditis elegans OX=6239 GN=coq-5 PE=3 SV=2	P34666|COQ5_CAEEL	32 kDa		5		5	5
	TRUE	Empty	Cell division control protein 42 homolog OS=Caenorhabditis elegans OX=6239 GN=cdc-42 PE=1 SV=2	Q05062|CDC42_CAEEL	21 kDa		6		6	5
	TRUE	Empty	2-(3-amino-3-carboxypropyl)histidine synthase subunit 2 OS=Caenorhabditis elegans OX=6239 GN=dph-2 PE=3 SV=2	Q09454|DPH2_CAEEL	53 kDa		4		5	5
	TRUE	Empty	Casein kinase I gamma OS=Caenorhabditis elegans OX=6239 GN=csnk-1 PE=3 SV=1	Q8WQ99|KC1G_CAEEL	46 kDa		4		7	5
	TRUE	Empty	ATPase family protein 2 homolog OS=Caenorhabditis elegans OX=6239 GN=cdc-48.3 PE=1 SV=1	Q21222|AFG2H_CAEEL	80 kDa	TRUE	4		8	2
	TRUE	Empty	Putative aminopeptidase W07G4.4 OS=Caenorhabditis elegans OX=6239 GN=lap-2 PE=3 SV=1	Q27245|YH24_CAEEL	56 kDa		3		3	11
	TRUE	Empty	Mitochondrial Rho GTPase 1 OS=Caenorhabditis elegans OX=6239 GN=miro-1 PE=3 SV=1	Q94263|MIRO1_CAEEL	70 kDa		2		6	4
	TRUE	Empty	Peptide-N(4)-(N-acetyl-beta-glucosaminyl)asparagine amidase OS=Caenorhabditis elegans OX=6239 GN=png-1 PE=1 SV=1	Q9TW67|NGLY1_CAEEL	69 kDa		5		1	5
	TRUE	Empty	Suppressor of zyg-1 protein 20 OS=Caenorhabditis elegans OX=6239 GN=szy-20 PE=1 SV=1	G5EGU9|SZY20_CAEEL	64 kDa		2		4	4
	TRUE	Empty	Nuclear migration and anchoring protein unc-84 OS=Caenorhabditis elegans OX=6239 GN=unc-84 PE=1 SV=2	Q20745|UNC84_CAEEL	126 kDa		8		1	8
	TRUE	Empty	Nipped-B-like protein pqn-85 OS=Caenorhabditis elegans OX=6239 GN=pqn-85 PE=3 SV=2	Q95XZ5|NPBL_CAEEL	253 kDa		0		2	2
	TRUE	Empty	DNA primase small subunit OS=Caenorhabditis elegans OX=6239 GN=pri-1 PE=3 SV=1	P34471|PRI1_CAEEL	48 kDa		0		11	1
	TRUE	Empty	Mitogen-activated protein kinase kinase kinase nsy-1 OS=Caenorhabditis elegans OX=6239 GN=nsy-1 PE=1 SV=4	Q21029|NSY1_CAEEL	170 kDa		8		0	5
	TRUE	Empty	Transforming acid coiled-coil-containing protein 1 OS=Caenorhabditis elegans OX=6239 GN=tac-1 PE=1 SV=1	G5ECG0|TACC1_CAEEL	29 kDa		4		6	4
	TRUE	Empty	Cytochrome c 2.1 OS=Caenorhabditis elegans OX=6239 GN=cyc-2.1 PE=1 SV=2	P19974|CYC21_CAEEL	12 kDa		5		4	5
	TRUE	Empty	TIP41-like protein OS=Caenorhabditis elegans OX=6239 GN=C02C2.6 PE=3 SV=3	P34274|TIPRL_CAEEL	33 kDa		4		7	5
	TRUE	Empty	Protein BUD31 homolog OS=Caenorhabditis elegans OX=6239 GN=bud-31 PE=2 SV=1	P34313|BUD31_CAEEL	17 kDa		6		7	6
	TRUE	Empty	Putative RNA-binding protein R05D3.8 OS=Caenorhabditis elegans OX=6239 GN=R05D3.8 PE=4 SV=3	P34541|YNC8_CAEEL	35 kDa		6		4	6
	TRUE	Empty	KH domain-containing protein akap-1 OS=Caenorhabditis elegans OX=6239 GN=akap-1 PE=3 SV=2	Q09285|AKAP1_CAEEL	96 kDa		4		4	3
	TRUE	Empty	Uncharacterized protein B0416.5 OS=Caenorhabditis elegans OX=6239 GN=B0416.5 PE=4 SV=1	Q11073|YT45_CAEEL	55 kDa		6		6	7
	TRUE	Empty	Serine/threonine-protein phosphatase PP1-alpha OS=Caenorhabditis elegans OX=6239 GN=gsp-1 PE=1 SV=2	Q27497|GLC7A_CAEEL	37 kDa	TRUE	6		4	6
	TRUE	Empty	Putative dihydrofolate reductase OS=Caenorhabditis elegans OX=6239 GN=dhfr-1 PE=3 SV=1	Q93341|DYR_CAEEL	22 kDa		2		5	4
	TRUE	Empty	Serine/threonine-protein kinase zyg-8 OS=Caenorhabditis elegans OX=6239 GN=zyg-8 PE=1 SV=1	Q95QC4|DCLK_CAEEL	90 kDa		6		3	4
	TRUE	Empty	Arf-GAP with ANK repeat and PH domain-containing protein cnt-2 OS=Caenorhabditis elegans OX=6239 GN=cnt-2 PE=1 SV=2	Q9XX14|CNT2_CAEEL	123 kDa		3		5	5
	TRUE	Empty	Probable S-adenosylmethionine synthase 4 OS=Caenorhabditis elegans OX=6239 GN=sams-4 PE=1 SV=1	P50306|METK4_CAEEL	44 kDa	TRUE	8		5	6
	TRUE	Empty	Sop-2-related protein 1 OS=Caenorhabditis elegans OX=6239 GN=sor-1 PE=1 SV=1	P34619|SOR1_CAEEL	113 kDa		3		3	2
	TRUE	Empty	Monensin-resistant homolog 2 OS=Caenorhabditis elegans OX=6239 GN=mon-2 PE=3 SV=2	Q19338|MON2_CAEEL	182 kDa		2		7	3
	TRUE	Empty	E3 SUMO-protein ligase gei-17 OS=Caenorhabditis elegans OX=6239 GN=gei-17 PE=1 SV=4	Q94361|GEI17_CAEEL	88 kDa		2		2	3
	TRUE	Empty	Protein arginine N-methyltransferase 7 OS=Caenorhabditis elegans OX=6239 GN=prmt-7 PE=1 SV=2	Q9XW42|ANM7_CAEEL	73 kDa		1		3	3
	TRUE	Empty	Probable methionine synthase OS=Caenorhabditis elegans OX=6239 GN=metr-1 PE=3 SV=1	Q09582|METH_CAEEL	139 kDa		1		5	1
	TRUE	Empty	Uncharacterized protein C16C10.8 OS=Caenorhabditis elegans OX=6239 GN=C16C10.8 PE=4 SV=1	Q09464|YQ58_CAEEL	29 kDa		7		1	7
	TRUE	Empty	LIM domain-containing protein unc-97 OS=Caenorhabditis elegans OX=6239 GN=unc-97 PE=1 SV=1	P50464|UNC97_CAEEL	40 kDa		6		2	5
	TRUE	Empty	Ceramide kinase 1 OS=Caenorhabditis elegans OX=6239 GN=cerk-1 PE=3 SV=1	Q9TZI1|CERK_CAEEL	62 kDa		9		1	4
	TRUE	Empty	Egalitarian protein homolog OS=Caenorhabditis elegans OX=6239 GN=egal-1 PE=1 SV=2	Q17902|EGAL1_CAEEL	65 kDa		5		0	4
	TRUE	Empty	LIM and SH3 domain protein F42H10.3 OS=Caenorhabditis elegans OX=6239 GN=F42H10.3 PE=4 SV=3	P34416|LASP1_CAEEL	37 kDa		11		0	5
	TRUE	Empty	Probable type I inositol 1,4,5-trisphosphate 5-phosphatase OS=Caenorhabditis elegans OX=6239 GN=ipp-5 PE=2 SV=2	Q17848|I5P1_CAEEL	48 kDa		9		0	7
	TRUE	Empty	ATP-dependent RNA helicase glh-4 OS=Caenorhabditis elegans OX=6239 GN=glh-4 PE=1 SV=2	O76743|GLH4_CAEEL	121 kDa		0		14	0
	TRUE	Empty	Set1/Ash2 histone methyltransferase complex subunit ash-2 OS=Caenorhabditis elegans OX=6239 GN=ash-2 PE=1 SV=1	G5EFZ3|ASH2_CAEEL	64 kDa		4		4	5
	TRUE	Empty	Germinal center kinase 1 OS=Caenorhabditis elegans OX=6239 GN=gck-1 PE=1 SV=1	H2L099|GCK1_CAEEL	71 kDa		5		3	7
	TRUE	Empty	Ras-related protein rab-11.1 OS=Caenorhabditis elegans OX=6239 GN=rab-11.1 PE=1 SV=1	O01803|RB11A_CAEEL	23 kDa		6		7	5
	TRUE	Empty	Eukaryotic translation initiation factor 4E-1 OS=Caenorhabditis elegans OX=6239 GN=ife-1 PE=1 SV=2	O45551|IF4E1_CAEEL	24 kDa	TRUE	4		6	4
	TRUE	Empty	Histone H1.2 OS=Caenorhabditis elegans OX=6239 GN=hil-2 PE=1 SV=3	P15796|H12_CAEEL	20 kDa	TRUE	4		4	7
	TRUE	Empty	V-type proton ATPase subunit D OS=Caenorhabditis elegans OX=6239 GN=vha-14 PE=3 SV=1	P34462|VATD_CAEEL	29 kDa		3		3	4
	TRUE	Empty	Mitogen-activated protein kinase pmk-1 OS=Caenorhabditis elegans OX=6239 GN=pmk-1 PE=1 SV=1	Q17446|PMK1_CAEEL	44 kDa		6		3	7
	TRUE	Empty	Protein kinase C-like 3 OS=Caenorhabditis elegans OX=6239 GN=pkc-3 PE=1 SV=1	Q19266|KPC3_CAEEL	68 kDa		2		5	3
	TRUE	Empty	ADP-ribosylation factor-like protein 1 OS=Caenorhabditis elegans OX=6239 GN=arl-1 PE=3 SV=2	Q20758|ARL1_CAEEL	20 kDa		5		6	7
	TRUE	Empty	Cytosolic Fe-S cluster assembly factor NUBP1 homolog OS=Caenorhabditis elegans OX=6239 GN=nubp-1 PE=2 SV=2	Q93459|NUBP1_CAEEL	33 kDa		4		5	4
	TRUE	Empty	Probable NADH dehydrogenase [ubiquinone] iron-sulfur protein 7, mitochondrial OS=Caenorhabditis elegans OX=6239 GN=nduf-7 PE=3 SV=1	Q94360|NDUS7_CAEEL	22 kDa		4		2	3
	TRUE	Empty	Proteasome subunit alpha type-4 OS=Caenorhabditis elegans OX=6239 GN=pas-3 PE=3 SV=2	Q9N599|PSA4_CAEEL	28 kDa		3		8	6
	TRUE	Empty	PCI domain-containing protein 2 homolog OS=Caenorhabditis elegans OX=6239 GN=C27F2.10 PE=3 SV=1	Q95QU0|PCID2_CAEEL	47 kDa		3		3	3
	TRUE	Empty	Chloride intracellular channel exc-4 OS=Caenorhabditis elegans OX=6239 GN=exc-4 PE=1 SV=2	Q8WQA4|EXC4_CAEEL	34 kDa		3		3	7
	TRUE	Empty	Cap-specific mRNA (nucleoside-2'-O-)-methyltransferase 1 OS=Caenorhabditis elegans OX=6239 GN=Y53F4B.13 PE=3 SV=3	Q9NAA5|MTR1_CAEEL	105 kDa		4		2	3
	TRUE	Empty	Ribosomal protein rpl-36.A OS=Caenorhabditis elegans OX=6239 GN=rpl-36.A PE=3 SV=2	P48166|RL36A_CAEEL	12 kDa		5		5	6
	TRUE	Empty	Proteasome subunit beta type-3 OS=Caenorhabditis elegans OX=6239 GN=pbs-3 PE=1 SV=1	Q23237|PSB3_CAEEL	23 kDa		2		9	5
	TRUE	Empty	Adenylate kinase OS=Caenorhabditis elegans OX=6239 GN=let-754 PE=3 SV=2	P34346|KAD2_CAEEL	28 kDa		2		6	4
	TRUE	Empty	Nucleosome-remodeling factor subunit NURF301-like OS=Caenorhabditis elegans OX=6239 GN=nurf-1 PE=1 SV=2	Q6BER5|NU301_CAEEL	252 kDa		1		2	1
	TRUE	Empty	Cell division cycle protein 16 homolog OS=Caenorhabditis elegans OX=6239 GN=emb-27 PE=1 SV=1	G5EG38|CDC16_CAEEL	75 kDa		1		4	2
	TRUE	Empty	Germinal center kinase 3 OS=Caenorhabditis elegans OX=6239 GN=gck-3 PE=1 SV=1	G5EEN4|GCK3_CAEEL	64 kDa		4		1	4
	TRUE	Empty	Hunchback-like protein OS=Caenorhabditis elegans OX=6239 GN=hbl-1 PE=1 SV=1	Q9XYD3|HBL1_CAEEL	107 kDa		3		1	10
	TRUE	Empty	UPF0183 protein T01G9.2 OS=Caenorhabditis elegans OX=6239 GN=T01G9.2 PE=1 SV=3	P34692|U183_CAEEL	48 kDa		1		8	5
	TRUE	Empty	GTPase-activating protein pac-1 OS=Caenorhabditis elegans OX=6239 GN=pac-1 PE=1 SV=4	P34288|PAC1_CAEEL	173 kDa		4		2	0
	TRUE	Empty	Putative phospholipase B-like 1 OS=Caenorhabditis elegans OX=6239 GN=Y37D8A.2 PE=1 SV=1	Q9XWV2|PLBL1_CAEEL	65 kDa		0		5	4
	TRUE	Empty	Histidine ammonia-lyase OS=Caenorhabditis elegans OX=6239 GN=haly-1 PE=1 SV=1	Q20502|HUTH1_CAEEL	75 kDa		8		0	4
	TRUE	Empty	WD repeat-containing protein fzy-1 OS=Caenorhabditis elegans OX=6239 GN=fzy-1 PE=1 SV=2	Q09373|FZY1_CAEEL	56 kDa		0		11	1
	TRUE	Empty	Wings apart-like protein homolog 1 OS=Caenorhabditis elegans OX=6239 GN=wapl-1 PE=3 SV=1	H2L0H5|WAPL_CAEEL	84 kDa		3		6	2
	TRUE	Empty	AP-1 complex subunit mu-1-I OS=Caenorhabditis elegans OX=6239 GN=unc-101 PE=1 SV=2	P35602|AP1M_CAEEL	48 kDa		4		4	4
	TRUE	Empty	Polyadenylation and cleavage factor homolog 11 OS=Caenorhabditis elegans OX=6239 GN=pcf-11 PE=4 SV=1	Q09345|PCF11_CAEEL	91 kDa		4		4	7
	TRUE	Empty	Serine/threonine-protein phosphatase 6 catalytic subunit OS=Caenorhabditis elegans OX=6239 GN=pph-6 PE=1 SV=2	Q09496|PPP6_CAEEL	37 kDa		4		4	4
	TRUE	Empty	Uncharacterized protein F52C9.3 OS=Caenorhabditis elegans OX=6239 GN=F52C9.3 PE=4 SV=2	Q10123|YSM3_CAEEL	50 kDa		6		4	5
	TRUE	Empty	Partner of xrn-2 protein 1 OS=Caenorhabditis elegans OX=6239 GN=paxt-1 PE=1 SV=2	Q21738|PAXT1_CAEEL	37 kDa		4		4	4
	TRUE	Empty	Ras-related protein Rab-6.2 OS=Caenorhabditis elegans OX=6239 GN=rab-6.2 PE=3 SV=1	Q22782|RAB6B_CAEEL	23 kDa	TRUE	4		4	5
	TRUE	Empty	Proteasome subunit alpha type-2 OS=Caenorhabditis elegans OX=6239 GN=pas-2 PE=1 SV=1	Q27488|PSA2_CAEEL	25 kDa		4		6	5
	TRUE	Empty	Serine palmitoyltransferase 3 OS=Caenorhabditis elegans OX=6239 GN=sptl-3 PE=3 SV=2	Q9XVI6|SPTC3_CAEEL	56 kDa		3		5	4
	TRUE	Empty	Protein BCCIP homolog OS=Caenorhabditis elegans OX=6239 GN=ZK1127.4 PE=3 SV=1	Q23402|BCCIP_CAEEL	40 kDa		2		2	3
	TRUE	Empty	Autophagic-related protein 16.2 OS=Caenorhabditis elegans OX=6239 GN=atg-16.2 PE=3 SV=2	Q09406|A16L2_CAEEL	60 kDa		5		2	6
	TRUE	Empty	Adenylyltransferase and sulfurtransferase MOCS3 OS=Caenorhabditis elegans OX=6239 GN=moc-3 PE=3 SV=2	O44510|MOCS3_CAEEL	44 kDa		3		1	3
	TRUE	Empty	RNA polymerase-associated protein CTR9 OS=Caenorhabditis elegans OX=6239 GN=ctr-9 PE=3 SV=3	Q03560|CTR9_CAEEL	132 kDa		1		3	2
	TRUE	Empty	Inositol hexakisphosphate and diphosphoinositol-pentakisphosphate kinase OS=Caenorhabditis elegans OX=6239 GN=F46F11.1 PE=3 SV=3	P91309|VIP1_CAEEL	150 kDa		1		4	3
	TRUE	Empty	Tubulin beta-1 chain OS=Caenorhabditis elegans OX=6239 GN=mec-7 PE=2 SV=1	P12456|TBB1_CAEEL	49 kDa	TRUE	6		0	3
	TRUE	Empty	Methionine synthase reductase OS=Caenorhabditis elegans OX=6239 GN=mtrr-1 PE=3 SV=1	Q17574|MTRR_CAEEL	77 kDa		9		2	0
	TRUE	Empty	Histone-lysine N-methyltransferase met-2 OS=Caenorhabditis elegans OX=6239 GN=met-2 PE=3 SV=5	P34544|MET2_CAEEL	148 kDa		1		3	0
	TRUE	Empty	Cytochrome c oxidase subunit 5A, mitochondrial OS=Caenorhabditis elegans OX=6239 GN=cox-5A PE=1 SV=2	P55954|COX5A_CAEEL	20 kDa		0		6	6
	TRUE	Empty	1,2-dihydroxy-3-keto-5-methylthiopentene dioxygenase homolog 1 OS=Caenorhabditis elegans OX=6239 GN=T01D1.4 PE=3 SV=1	P91416|MTND1_CAEEL	19 kDa		7		0	10
	TRUE	Empty	1,2-dihydroxy-3-keto-5-methylthiopentene dioxygenase homolog 2 OS=Caenorhabditis elegans OX=6239 GN=K07E1.1 PE=3 SV=2	Q09407|MTND2_CAEEL	19 kDa		6		0	7
	TRUE	Empty	UBX domain-containing protein 6 OS=Caenorhabditis elegans OX=6239 GN=ubxn-6 PE=1 SV=2	Q8WTJ4|UBXN6_CAEEL	49 kDa		0		9	6
	TRUE	Empty	Serine/threonine-protein kinase chk-1 OS=Caenorhabditis elegans OX=6239 GN=chk-1 PE=1 SV=2	Q9N3Z3|CHK1_CAEEL	57 kDa		0		12	0
	TRUE	Empty	Probable actin-related protein 2/3 complex subunit 4 OS=Caenorhabditis elegans OX=6239 GN=arx-6 PE=3 SV=1	P58798|ARPC4_CAEEL	20 kDa		5		4	5
	TRUE	Empty	Dual specificity tyrosine-phosphorylation-regulated kinase mbk-1 OS=Caenorhabditis elegans OX=6239 GN=mbk-1 PE=1 SV=1	Q8WQL7|MBK1_CAEEL	101 kDa		3		4	5
	TRUE	Empty	Defective in cullin neddylation protein 1 OS=Caenorhabditis elegans OX=6239 GN=dcn-1 PE=1 SV=2	Q9U3C8|DCN1_CAEEL	34 kDa		4		6	4
	TRUE	Empty	Thioredoxin reductase-like selenoprotein T homolog selt-1.1 OS=Caenorhabditis elegans OX=6239 GN=selt-1.1 PE=2 SV=2	Q9U3N5|SELT1_CAEEL	28 kDa		5		4	6
	TRUE	Empty	Maternal uncoordinated protein 2 OS=Caenorhabditis elegans OX=6239 GN=mau-2 PE=1 SV=1	O17581|SCC4_CAEEL	68 kDa		2		3	3
	TRUE	Empty	Exocyst complex component 4 OS=Caenorhabditis elegans OX=6239 GN=sec-8 PE=2 SV=2	Q9XWS2|EXOC4_CAEEL	101 kDa		2		3	2
	TRUE	Empty	Cyclin-dependent kinase 7 OS=Caenorhabditis elegans OX=6239 GN=cdk-7 PE=1 SV=1	G5EFV5|CDK7_CAEEL	38 kDa		3		2	3
	TRUE	Empty	Superoxide dismutase [Mn] 1, mitochondrial OS=Caenorhabditis elegans OX=6239 GN=sod-2 PE=1 SV=1	P31161|SODM1_CAEEL	25 kDa		2		8	6
	TRUE	Empty	Mitogen-activated protein kinase mpk-1 OS=Caenorhabditis elegans OX=6239 GN=mpk-1 PE=1 SV=2	P39745|MPK1_CAEEL	51 kDa		4		2	2
	TRUE	Empty	Triosephosphate isomerase OS=Caenorhabditis elegans OX=6239 GN=tpi-1 PE=1 SV=2	Q10657|TPIS_CAEEL	27 kDa		2		6	7
	TRUE	Empty	mRNA-capping enzyme OS=Caenorhabditis elegans OX=6239 GN=cel-1 PE=1 SV=2	Q17607|MCE1_CAEEL	72 kDa		3		4	4
	TRUE	Empty	Dual specificity mitogen-activated protein kinase kinase sek-1 OS=Caenorhabditis elegans OX=6239 GN=sek-1 PE=1 SV=1	G5EDF7|SEK1_CAEEL	39 kDa		3		2	4
	TRUE	Empty	Apoptotic enhancer 1 protein OS=Caenorhabditis elegans OX=6239 GN=ape-1 PE=1 SV=1	Q9XVN3|IASPP_CAEEL	85 kDa		3		4	3
	TRUE	Empty	RNA polymerase-associated protein RTF1 homolog OS=Caenorhabditis elegans OX=6239 GN=rtfo-1 PE=2 SV=1	G5EBY0|RTF1_CAEEL	68 kDa		2		1	3
	TRUE	Empty	TGF-beta-activated kinase 1 and MAP3K7-binding protein 1 OS=Caenorhabditis elegans OX=6239 GN=tap-1 PE=1 SV=1	G5EEM6|TAB1_CAEEL	43 kDa		7		1	6
	TRUE	Empty	Probable RNA 3'-terminal phosphate cyclase-like protein OS=Caenorhabditis elegans OX=6239 GN=ZK1127.5 PE=3 SV=2	Q23400|RCL1_CAEEL	42 kDa		3		0	6
	TRUE	Empty	Serine/threonine-protein phosphatase 4 regulatory subunit 1 OS=Caenorhabditis elegans OX=6239 GN=ppfr-1 PE=1 SV=1	G5ECH5|PP4R1_CAEEL	174 kDa		1		5	2
	TRUE	Empty	Zygote defective protein 12 OS=Caenorhabditis elegans OX=6239 GN=zyg-12 PE=1 SV=5	Q23529|HOOK_CAEEL	89 kDa		3		1	8
	TRUE	Empty	Leucine-rich repeat-containing protein let-4 OS=Caenorhabditis elegans OX=6239 GN=let-4 PE=2 SV=2	Q93373|LET4_CAEEL	85 kDa		0	0	2	10
	TRUE	Empty	Zinc finger CCCH domain-containing protein 15 homolog OS=Caenorhabditis elegans OX=6239 GN=F27D4.4 PE=3 SV=3	Q93618|ZC3HF_CAEEL	43 kDa		0		2	1
	TRUE	Empty	Tyramine beta-hydroxylase OS=Caenorhabditis elegans OX=6239 GN=tbh-1 PE=1 SV=3	Q9XTQ6|TBH1_CAEEL	75 kDa		0		5	2
	TRUE	Empty	Protein kinase C-like 1B OS=Caenorhabditis elegans OX=6239 GN=pkc-1 PE=2 SV=2	P34885|KPC1B_CAEEL	80 kDa		7		0	2
	TRUE	Empty	Uncharacterized protein F36G3.2 OS=Caenorhabditis elegans OX=6239 GN=F36G3.2 PE=4 SV=1	Q09318|YQY2_CAEEL	35 kDa		6		0	5
	TRUE	Empty	Probable sodium/potassium-transporting ATPase subunit beta-3 OS=Caenorhabditis elegans OX=6239 GN=nkb-3 PE=3 SV=1	Q9XUY5|AT1B3_CAEEL	36 kDa	TRUE	10		0	1
	TRUE	Empty	Uncharacterized protein ZK688.5 OS=Caenorhabditis elegans OX=6239 GN=ZK688.5 PE=4 SV=2	P34675|YO25_CAEEL	182 kDa		0		5	1
	TRUE	Empty	DNA polymerase alpha subunit B OS=Caenorhabditis elegans OX=6239 GN=div-1 PE=3 SV=3	Q21625|DPOA2_CAEEL	64 kDa		0		14	0
	TRUE	Empty	Small RNA 2'-O-methyltransferase OS=Caenorhabditis elegans OX=6239 GN=henn-1 PE=1 SV=3	P34283|HENMT_CAEEL	51 kDa		4		5	5
	TRUE	Empty	Density-regulated protein homolog OS=Caenorhabditis elegans OX=6239 GN=Y47D3A.21 PE=3 SV=1	Q9NAH4|DENR_CAEEL	20 kDa		4		6	5
	TRUE	Empty	C-type lectin domain-containing protein 87 OS=Caenorhabditis elegans OX=6239 GN=clec-87 PE=1 SV=1	Q9XVS3|CLC87_CAEEL	27 kDa	TRUE	2		5	5
	TRUE	Empty	Vacuolar protein sorting-associated protein 16 homolog OS=Caenorhabditis elegans OX=6239 GN=vps-16 PE=3 SV=2	Q11182|VPS16_CAEEL	96 kDa		3		3	3
	TRUE	Empty	Probable NADH dehydrogenase [ubiquinone] iron-sulfur protein 2, mitochondrial OS=Caenorhabditis elegans OX=6239 GN=gas-1 PE=3 SV=2	Q93873|NDUS2_CAEEL	55 kDa		2		5	5
	TRUE	Empty	Probable DNA-directed RNA polymerases I, II, and III subunit RPABC3 OS=Caenorhabditis elegans OX=6239 GN=rpb-8 PE=1 SV=1	Q19826|RPAB3_CAEEL	17 kDa		2		5	4
	TRUE	Empty	NEDD8 OS=Caenorhabditis elegans OX=6239 GN=ned-8 PE=1 SV=1	Q93725|NEDD8_CAEEL	9 kDa		2		6	3
	TRUE	Empty	Ubiquitin thioesterase otubain-like OS=Caenorhabditis elegans OX=6239 GN=otub-1 PE=1 SV=1	Q9XVR6|OTUBL_CAEEL	32 kDa		3		7	5
	TRUE	Empty	Protein lin-61 OS=Caenorhabditis elegans OX=6239 GN=lin-61 PE=1 SV=1	B2D6M2|LIN61_CAEEL	71 kDa		5		2	2
	TRUE	Empty	Splicing factor 3B subunit 6-like protein OS=Caenorhabditis elegans OX=6239 GN=C50D2.5 PE=3 SV=2	Q8ITY4|SF3B6_CAEEL	16 kDa		3		5	5
	TRUE	Empty	Actin-1 OS=Caenorhabditis elegans OX=6239 GN=act-1 PE=1 SV=1	P0DM41|ACT1_CAEEL (+1)	42 kDa	TRUE	5		6	5
	TRUE	Empty	Sop-2-related protein 3 OS=Caenorhabditis elegans OX=6239 GN=sor-3 PE=2 SV=3	Q11193|SOR3_CAEEL	62 kDa		4		1	3
	TRUE	Empty	Zinc metalloproteinase nas-34 OS=Caenorhabditis elegans OX=6239 GN=hch-1 PE=1 SV=1	Q21059|NAS34_CAEEL	66 kDa		6		1	5
	TRUE	Empty	Myotubularin-related protein 1 OS=Caenorhabditis elegans OX=6239 GN=mtm-1 PE=1 SV=2	Q9N589|MTMR1_CAEEL	68 kDa		5		1	2
	TRUE	Empty	Proteasome subunit pbs-5 OS=Caenorhabditis elegans OX=6239 GN=pbs-5 PE=3 SV=1	Q9XUV0|PBS5_CAEEL	31 kDa		1		5	3
	TRUE	Empty	Ribosome biogenesis protein NOP53 OS=Caenorhabditis elegans OX=6239 GN=Y39B6A.33 PE=3 SV=1	Q9NEU5|NOP53_CAEEL	50 kDa		3		1	8
	TRUE	Empty	Pre-mRNA-splicing factor SLU7 OS=Caenorhabditis elegans OX=6239 GN=K07C5.6 PE=3 SV=1	Q21278|SLU7_CAEEL	74 kDa		1		3	2
	TRUE	Empty	Probable small nuclear ribonucleoprotein Sm D1 OS=Caenorhabditis elegans OX=6239 GN=snr-3 PE=3 SV=1	Q10013|SMD1_CAEEL	14 kDa		1		7	6
	TRUE	Empty	Co-chaperone protein daf-41 OS=Caenorhabditis elegans OX=6239 GN=daf-41 PE=2 SV=1	Q23280|DAF41_CAEEL	19 kDa		1		5	3
	TRUE	Empty	Juxtamembrane domain-associated catenin OS=Caenorhabditis elegans OX=6239 GN=jac-1 PE=1 SV=2	Q9U308|JAC1_CAEEL	138 kDa		1		1	5
	TRUE	Empty	Tropomodulin OS=Caenorhabditis elegans OX=6239 GN=unc-94 PE=1 SV=2	O01479|TMOD_CAEEL	44 kDa		3		1	4
	TRUE	Empty	Condensin complex subunit dpy-26 OS=Caenorhabditis elegans OX=6239 GN=dpy-26 PE=1 SV=1	G5EGE9|DPY26_CAEEL	143 kDa		0		3	6
	TRUE	Empty	Intermediate filament protein ifc-2 OS=Caenorhabditis elegans OX=6239 GN=ifc-2 PE=2 SV=3	Q21067|IFC2_CAEEL	70 kDa	TRUE	7		0	3
	TRUE	Empty	Ack-related non-receptor tyrosine kinase OS=Caenorhabditis elegans OX=6239 GN=ark-1 PE=2 SV=1	G5EBZ8|ARK1_CAEEL	115 kDa		6		0	2
	TRUE	Empty	mRNA export factor rae-1 OS=Caenorhabditis elegans OX=6239 GN=rae-1 PE=1 SV=1	Q93454|RAE1_CAEEL	41 kDa		0		8	1
	TRUE	Empty	Putative ribosomal protein S6 kinase alpha-2 OS=Caenorhabditis elegans OX=6239 GN=rskn-2 PE=3 SV=2	Q18846|KS6A2_CAEEL	87 kDa		8		0	1
	TRUE	Empty	Ectopic P granules protein 2 OS=Caenorhabditis elegans OX=6239 GN=epg-2 PE=1 SV=1	Q95XR4|EPG2_CAEEL	80 kDa		0		6	0
	TRUE	Empty	MICOS complex subunit MIC27 OS=Caenorhabditis elegans OX=6239 GN=moma-1 PE=2 SV=1	Q21154|MOMA1_CAEEL	22 kDa		3		5	4
	TRUE	Empty	Phosphatidylinositol-binding clathrin assembly protein unc-11 OS=Caenorhabditis elegans OX=6239 GN=unc-11 PE=1 SV=1	Q9XZI6|PICAL_CAEEL	64 kDa		4		4	5
	TRUE	Empty	Casein kinase I isoform delta OS=Caenorhabditis elegans OX=6239 GN=kin-20 PE=2 SV=3	Q20471|KIN20_CAEEL	57 kDa	TRUE	3		3	5
	TRUE	Empty	Cytoplasmic tRNA 2-thiolation protein 1 OS=Caenorhabditis elegans OX=6239 GN=tut-1 PE=1 SV=1	O76365|CTU1_CAEEL	41 kDa		2		5	3
	TRUE	Empty	Ectopic P granules protein 3 OS=Caenorhabditis elegans OX=6239 GN=epg-3 PE=2 SV=2	Q9XWU8|VMP1_CAEEL	52 kDa		3		3	5
	TRUE	Empty	Ubiquitin-conjugating enzyme E2 variant 1 OS=Caenorhabditis elegans OX=6239 GN=uev-1 PE=1 SV=1	O45495|UB2V1_CAEEL	16 kDa		2		3	4
	TRUE	Empty	SET domain-containing protein 14 OS=Caenorhabditis elegans OX=6239 GN=set-14 PE=4 SV=2	Q09415|SET14_CAEEL	49 kDa		5		3	2
	TRUE	Empty	60S acidic ribosomal protein P1 OS=Caenorhabditis elegans OX=6239 GN=rla-1 PE=3 SV=2	P91913|RLA1_CAEEL	11 kDa	TRUE	3		5	4
	TRUE	Empty	Serine/threonine-protein kinase cst-1 OS=Caenorhabditis elegans OX=6239 GN=cst-1 PE=1 SV=1	Q9NB31|CST1_CAEEL	56 kDa		2		1	2
	TRUE	Empty	Cytoplasmic FMR1-interacting protein homolog OS=Caenorhabditis elegans OX=6239 GN=gex-2 PE=1 SV=4	O44518|CYFIP_CAEEL	145 kDa		3		2	1
	TRUE	Empty	Probable small nuclear ribonucleoprotein-associated protein B OS=Caenorhabditis elegans OX=6239 GN=snr-2 PE=3 SV=1	P91918|RSMB_CAEEL	17 kDa		1		3	4
	TRUE	Empty	G-patch domain and KOW motifs-containing protein homolog 1 OS=Caenorhabditis elegans OX=6239 GN=gkow-1 PE=1 SV=1	Q21924|GPKOW_CAEEL	52 kDa		1		1	4
	TRUE	Empty	Vacuolar protein sorting-associated protein 33A OS=Caenorhabditis elegans OX=6239 GN=vps-33.1 PE=1 SV=4	P34260|VP33A_CAEEL	68 kDa		1		4	2
	TRUE	Empty	Probable protein phosphatase methylesterase 1 OS=Caenorhabditis elegans OX=6239 GN=B0464.9 PE=3 SV=1	Q9BIB3|PPME1_CAEEL	40 kDa		2		0	2
	TRUE	Empty	E3 ubiquitin-protein ligase ubr-1 OS=Caenorhabditis elegans OX=6239 GN=ubr-1 PE=1 SV=2	P91133|UBR1_CAEEL	233 kDa		1		3	0
	TRUE	Empty	Nucleoporin ndc-1 OS=Caenorhabditis elegans OX=6239 GN=npp-22 PE=3 SV=1	Q8I4N3|NDC1_CAEEL	66 kDa		1		6	1
	TRUE	Empty	Peptidyl-prolyl cis-trans isomerase 4 OS=Caenorhabditis elegans OX=6239 GN=cyn-4 PE=1 SV=3	P52012|PPIL2_CAEEL	59 kDa		1		3	6
	TRUE	Empty	Uncharacterized oxidoreductase F53C11.3 OS=Caenorhabditis elegans OX=6239 GN=F53C11.3 PE=3 SV=1	Q93761|YXEK_CAEEL	33 kDa		2		4	3
	TRUE	Empty	Leucine-rich repeat protein soc-2 OS=Caenorhabditis elegans OX=6239 GN=soc-2 PE=1 SV=3	Q22875|SHOC2_CAEEL	62 kDa		6		0	5
	TRUE	Empty	Ribosome biogenesis protein BRX1 homolog OS=Caenorhabditis elegans OX=6239 GN=K12H4.3 PE=3 SV=1	P34524|BRX1_CAEEL	40 kDa		6		0	4
	TRUE	Empty	Protein kinase C-like 1 OS=Caenorhabditis elegans OX=6239 GN=tpa-1 PE=1 SV=2	P34722|KPC1_CAEEL	80 kDa		6		0	2
	TRUE	Empty	Anillin-like protein 1 OS=Caenorhabditis elegans OX=6239 GN=ani-1 PE=2 SV=2	Q9XTT4|ANI1_CAEEL	127 kDa		0		9	0
	TRUE	Empty	Putative pachytene checkpoint protein 2 OS=Caenorhabditis elegans OX=6239 GN=pch-2 PE=1 SV=1	Q09535|PCH2_CAEEL	48 kDa		3		5	5
	TRUE	Empty	Probable H/ACA ribonucleoprotein complex subunit 1-like protein OS=Caenorhabditis elegans OX=6239 GN=Y66H1A.4 PE=3 SV=2	Q9TYK1|GAR1_CAEEL	25 kDa		5		3	4
	TRUE	Empty	Succinate dehydrogenase cytochrome b560 subunit, mitochondrial OS=Caenorhabditis elegans OX=6239 GN=mev-1 PE=2 SV=1	P41956|C560_CAEEL	20 kDa		5		6	3
	TRUE	Empty	Probable FAD synthase OS=Caenorhabditis elegans OX=6239 GN=flad-1 PE=3 SV=1	Q22017|FAD1_CAEEL	59 kDa		4		4	3
	TRUE	Empty	Uncharacterized protein ZK632.2 OS=Caenorhabditis elegans OX=6239 GN=ZK632.2 PE=4 SV=1	P34648|YOT2_CAEEL	81 kDa		4		4	2
	TRUE	Empty	Uncharacterized protein ZK637.2 OS=Caenorhabditis elegans OX=6239 GN=ZK637.2 PE=3 SV=2	P30629|YOU2_CAEEL	16 kDa		4		6	5
	TRUE	Empty	Small ubiquitin-related modifier OS=Caenorhabditis elegans OX=6239 GN=smo-1 PE=1 SV=1	P55853|SUMO_CAEEL	10 kDa		4		3	4
	TRUE	Empty	Putative cystathionine gamma-lyase 2 OS=Caenorhabditis elegans OX=6239 GN=cth-2 PE=3 SV=1	P55216|CGL2_CAEEL	43 kDa		5		2	4
	TRUE	Empty	Probable cleavage and polyadenylation specificity factor subunit 2 OS=Caenorhabditis elegans OX=6239 GN=cpsf-2 PE=3 SV=1	O17403|CPSF2_CAEEL	96 kDa		3		3	1
	TRUE	Empty	Uridine and thymidine phosphorylase OS=Caenorhabditis elegans OX=6239 GN=upp-1 PE=1 SV=2	Q23588|UTPP_CAEEL	33 kDa		2		1	3
	TRUE	Empty	mRNA-decapping enzyme 2 OS=Caenorhabditis elegans OX=6239 GN=dcap-2 PE=2 SV=4	O62255|DCP2_CAEEL	87 kDa		5		2	5
	TRUE	Empty	Putative bolA-like protein K11H12.1 OS=Caenorhabditis elegans OX=6239 GN=K11H12.1 PE=3 SV=1	P91375|YN1I_CAEEL	12 kDa		1		5	6
	TRUE	Empty	Dual specificity tyrosine-phosphorylation-regulated kinase mbk-2 OS=Caenorhabditis elegans OX=6239 GN=mbk-2 PE=1 SV=1	Q9XTF3|MBK2_CAEEL	90 kDa		1		4	2
	TRUE	Empty	Probable mitochondrial import inner membrane translocase subunit tim-17B.1 OS=Caenorhabditis elegans OX=6239 GN=timm-17B.1 PE=3 SV=1	O44477|T17B1_CAEEL	19 kDa		4		5	3
	TRUE	Empty	Mannosyl-oligosaccharide glucosidase OS=Caenorhabditis elegans OX=6239 GN=mogs-1 PE=1 SV=2	Q19426|MOGS1_CAEEL	93 kDa		0		3	1
	TRUE	Empty	ADP-ribosylation factor-like protein 3 OS=Caenorhabditis elegans OX=6239 GN=arl-3 PE=1 SV=1	O45379|ARL3_CAEEL	21 kDa		5		1	4
	TRUE	Empty	SAM50-like protein gop-3 OS=Caenorhabditis elegans OX=6239 GN=gop-3 PE=2 SV=2	P46576|SAM50_CAEEL	47 kDa		1		4	4
	TRUE	Empty	Fatty acid-binding protein homolog 9 OS=Caenorhabditis elegans OX=6239 GN=lbp-9 PE=3 SV=1	Q965W1|FABP9_CAEEL	17 kDa		2		5	6
	TRUE	Empty	2-amino-3-carboxymuconate-6-semialdehyde decarboxylase OS=Caenorhabditis elegans OX=6239 GN=acsd-1 PE=2 SV=1	Q8T8B9|ACMSD_CAEEL	46 kDa		1		0	6
	TRUE	Empty	Calnexin OS=Caenorhabditis elegans OX=6239 GN=cnx-1 PE=1 SV=1	P34652|CALX_CAEEL	69 kDa		0		3	1
	TRUE	Empty	Double-strand break repair protein mre-11 OS=Caenorhabditis elegans OX=6239 GN=mre-11 PE=1 SV=2	Q23255|MRE11_CAEEL	82 kDa		1		10	2
	TRUE	Empty	Vacuolar protein sorting-associated protein 26 OS=Caenorhabditis elegans OX=6239 GN=vps-26 PE=3 SV=2	O01258|VPS26_CAEEL	41 kDa		0		5	2
	TRUE	Empty	Golgi SNAP receptor complex member 1 OS=Caenorhabditis elegans OX=6239 GN=gos-28 PE=2 SV=1	Q95ZW1|GOSR1_CAEEL	27 kDa		2		1	3
	TRUE	Empty	Protein pad-1 OS=Caenorhabditis elegans OX=6239 GN=pad-1 PE=2 SV=2	Q9XW10|PAD1_CAEEL	267 kDa		3		1	0
	TRUE	Empty	Protein kinase C-like 2 OS=Caenorhabditis elegans OX=6239 GN=pkc-2 PE=2 SV=2	P90980|KPC2_CAEEL	78 kDa		4		0	1
	TRUE	Empty	Probable phospholipase D F09G2.8 OS=Caenorhabditis elegans OX=6239 GN=F09G2.8 PE=1 SV=2	O17405|PLDL_CAEEL	63 kDa		2		0	2
	TRUE	Empty	Zinc finger protein unc-98 OS=Caenorhabditis elegans OX=6239 GN=unc-98 PE=1 SV=2	Q19203|UNC98_CAEEL	35 kDa		5		0	6
	TRUE	Empty	Coronin-like protein cor-1 OS=Caenorhabditis elegans OX=6239 GN=cor-1 PE=2 SV=2	Q21624|CORO_CAEEL	67 kDa		8		0	3
	TRUE	Empty	Probable ATP-dependent RNA helicase DDX55 homolog OS=Caenorhabditis elegans OX=6239 GN=ZK512.2 PE=3 SV=2	P34640|DDX55_CAEEL	66 kDa		2		0	6
	TRUE	Empty	Dual specificity protein phosphatase lip-1 OS=Caenorhabditis elegans OX=6239 GN=lip-1 PE=1 SV=1	V6CIV8|DUSL_CAEEL	42 kDa		5		0	1
	TRUE	Empty	Inactive angiotensin-converting enzyme-related protein OS=Caenorhabditis elegans OX=6239 GN=acn-1 PE=1 SV=2	Q18581|ACN1_CAEEL	101 kDa		1		0	5
	TRUE	Empty	Lysozyme-like protein 1 OS=Caenorhabditis elegans OX=6239 GN=lys-1 PE=2 SV=1	O62415|LYS1_CAEEL	32 kDa		2	0	3	2
	TRUE	Empty	Lysophospholipid acyltransferase 5 OS=Caenorhabditis elegans OX=6239 GN=mboa-6 PE=1 SV=2	O01925|MBOA5_CAEEL	54 kDa		2		4	4
	TRUE	Empty	Probable dolichyl-diphosphooligosaccharide--protein glycosyltransferase subunit 3 OS=Caenorhabditis elegans OX=6239 GN=ZK686.3 PE=3 SV=2	P34669|OST3_CAEEL	39 kDa		2		4	4
	TRUE	Empty	Ras-related protein Rap-1 OS=Caenorhabditis elegans OX=6239 GN=rap-1 PE=3 SV=1	Q18246|RAP1_CAEEL	21 kDa		5		2	3
	TRUE	Empty	NAD-dependent protein deacetylase sir-2.1 OS=Caenorhabditis elegans OX=6239 GN=sir-2.1 PE=1 SV=1	Q21921|SIR2_CAEEL	69 kDa		2		3	4
	TRUE	Empty	Histone H2A.V OS=Caenorhabditis elegans OX=6239 GN=htz-1 PE=2 SV=3	Q27511|H2AV_CAEEL	15 kDa	TRUE	3		5	6
	TRUE	Empty	C-type lectin domain-containing protein 91 OS=Caenorhabditis elegans OX=6239 GN=clec-91 PE=1 SV=1	Q94417|CLC91_CAEEL	26 kDa	TRUE	3		6	4
	TRUE	Empty	Potential E3 ubiquitin-protein ligase ariadne-2 OS=Caenorhabditis elegans OX=6239 GN=T12E12.1 PE=3 SV=2	Q22431|ARI2_CAEEL	56 kDa		4		2	3
	TRUE	Empty	Ras-related protein Rab-33 OS=Caenorhabditis elegans OX=6239 GN=rab-33 PE=2 SV=1	Q20365|RAB33_CAEEL	34 kDa		3		3	3
	TRUE	Empty	Probable mannose-6-phosphate isomerase OS=Caenorhabditis elegans OX=6239 GN=ZK632.4 PE=3 SV=3	P34650|MPI_CAEEL	46 kDa		2		5	5
	TRUE	Empty	Probable 39S ribosomal protein L23, mitochondrial OS=Caenorhabditis elegans OX=6239 GN=mrpl-23 PE=3 SV=1	Q9GYS9|RM23_CAEEL	19 kDa		3		3	1
	TRUE	Empty	Alpha/beta hydrolase domain-containing protein aho-3 OS=Caenorhabditis elegans OX=6239 GN=aho-3 PE=1 SV=2	Q21221|AHO3_CAEEL	36 kDa		1		3	2
	TRUE	Empty	Sphingosine-1-phosphate lyase OS=Caenorhabditis elegans OX=6239 GN=spl-1 PE=1 SV=1	Q9Y194|SGPL_CAEEL	61 kDa		1		3	3
	TRUE	Empty	Dynein light chain 1, cytoplasmic OS=Caenorhabditis elegans OX=6239 GN=dlc-1 PE=1 SV=1	Q22799|DYL1_CAEEL	10 kDa		2		2	4
	TRUE	Empty	Threonylcarbamoyladenosine tRNA methylthiotransferase OS=Caenorhabditis elegans OX=6239 GN=Y92H12BL.1 PE=3 SV=2	Q8MXQ7|CDKAL_CAEEL	49 kDa		2		3	3
	TRUE	Empty	Putative tRNA (cytidine(32)/guanosine(34)-2'-O)-methyltransferase OS=Caenorhabditis elegans OX=6239 GN=R74.7 PE=3 SV=3	Q22031|TRM7_CAEEL	38 kDa		1		4	3
	TRUE	Empty	Globin-like protein OS=Caenorhabditis elegans OX=6239 GN=glb-1 PE=1 SV=2	P30627|GLBH_CAEEL	19 kDa		5		1	5
	TRUE	Empty	Putative NipSnap protein K02D10.1 OS=Caenorhabditis elegans OX=6239 GN=K02D10.1 PE=2 SV=4	P34492|YMQ1_CAEEL	59 kDa		1		4	1
	TRUE	Empty	Cadherin-related hmr-1 OS=Caenorhabditis elegans OX=6239 GN=hmr-1 PE=1 SV=1	Q967F4|HMR1_CAEEL	324 kDa		2		1	2
	TRUE	Empty	Tetratricopeptide repeat-containing protein trd-1 OS=Caenorhabditis elegans OX=6239 GN=trd-1 PE=2 SV=2	P41842|TTC27_CAEEL	88 kDa		3		5	1
	TRUE	Empty	Innexin-2 OS=Caenorhabditis elegans OX=6239 GN=inx-2 PE=2 SV=2	Q9U3K5|INX2_CAEEL	49 kDa		3		3	0
	TRUE	Empty	La-related protein 1 OS=Caenorhabditis elegans OX=6239 GN=larp-1 PE=4 SV=2	D5MCN2|LARP1_CAEEL	128 kDa		0		2	5
	TRUE	Empty	Probable glutathione S-transferase gst-36 OS=Caenorhabditis elegans OX=6239 GN=gst-36 PE=3 SV=2	Q09607|GST36_CAEEL	24 kDa		2		0	3
	TRUE	Empty	Adenylate kinase isoenzyme 1 OS=Caenorhabditis elegans OX=6239 GN=F38B2.4 PE=2 SV=1	Q20140|KAD1_CAEEL	23 kDa		5		0	3
	TRUE	Empty	Tropomyosin isoforms a/b/d/f OS=Caenorhabditis elegans OX=6239 GN=lev-11 PE=1 SV=1	Q22866|TPM1_CAEEL	33 kDa		2		0	7
	TRUE	Empty	Intermediate filament protein ifd-2 OS=Caenorhabditis elegans OX=6239 GN=ifd-2 PE=3 SV=1	Q19782|IFD2_CAEEL	52 kDa	TRUE	3		0	1
	TRUE	Empty	Intermediate filament protein ifa-3 OS=Caenorhabditis elegans OX=6239 GN=ifa-3 PE=1 SV=1	Q21065|IFA3_CAEEL	67 kDa	TRUE	1		0	6
	TRUE	Empty	Protein sepa-1 OS=Caenorhabditis elegans OX=6239 GN=sepa-1 PE=1 SV=1	G5EC37|SEPA1_CAEEL	80 kDa		0		4	0
	TRUE	Empty	Kinetochore null protein 1 OS=Caenorhabditis elegans OX=6239 GN=knl-1 PE=1 SV=3	P34278|KNL1_CAEEL	113 kDa		0		11	0
	TRUE	Empty	Uncharacterized protein R08D7.4 OS=Caenorhabditis elegans OX=6239 GN=R08D7.4 PE=4 SV=3	P30643|YNE4_CAEEL	42 kDa		3		3	3
	TRUE	Empty	NADH pyrophosphatase OS=Caenorhabditis elegans OX=6239 GN=ndx-9 PE=1 SV=3	Q19427|NPY1_CAEEL	42 kDa		4		3	2
	TRUE	Empty	Zinc finger protein dpff-1 OS=Caenorhabditis elegans OX=6239 GN=dpff-1 PE=3 SV=2	Q09477|DPFF1_CAEEL	42 kDa		2		4	3
	TRUE	Empty	Deoxyhypusine hydroxylase OS=Caenorhabditis elegans OX=6239 GN=dohh-1 PE=3 SV=1	Q17949|DOHH_CAEEL	33 kDa		4		3	4
	TRUE	Empty	Putative histone deacetylase 2 OS=Caenorhabditis elegans OX=6239 GN=hda-2 PE=1 SV=1	Q09440|HDA2_CAEEL	57 kDa		1		4	3
	TRUE	Empty	RNA/RNP complex-1-interacting phosphatase homolog OS=Caenorhabditis elegans OX=6239 GN=pir-1 PE=1 SV=2	Q22707|DUS11_CAEEL	27 kDa		2		3	4
	TRUE	Empty	Myosin-2 essential light chain OS=Caenorhabditis elegans OX=6239 GN=mlc-5 PE=1 SV=1	Q9XVI9|MLC5_CAEEL	16 kDa		1		3	6
	TRUE	Empty	Probable phosphoserine aminotransferase OS=Caenorhabditis elegans OX=6239 GN=F26H9.5 PE=3 SV=1	P91856|SERC_CAEEL	41 kDa		2		4	4
	TRUE	Empty	Putative 28S ribosomal protein S5, mitochondrial OS=Caenorhabditis elegans OX=6239 GN=mrps-5 PE=3 SV=3	Q93425|RT05_CAEEL	50 kDa		1		4	1
	TRUE	Empty	Mediator of RNA polymerase II transcription subunit 14 OS=Caenorhabditis elegans OX=6239 GN=rgr-1 PE=3 SV=6	Q03570|MED14_CAEEL	170 kDa		3		1	3
	TRUE	Empty	Single-stranded DNA-binding protein, mitochondrial OS=Caenorhabditis elegans OX=6239 GN=mtss-1 PE=2 SV=2	P34496|MTSS1_CAEEL	19 kDa		1		4	4
	TRUE	Empty	Probable 3-hydroxyacyl-CoA dehydrogenase B0272.3 OS=Caenorhabditis elegans OX=6239 GN=B0272.3 PE=3 SV=1	P41938|HCDH2_CAEEL	33 kDa		1		4	2
	TRUE	Empty	Putative syntaxin-5 OS=Caenorhabditis elegans OX=6239 GN=syx-5 PE=3 SV=1	Q20797|STX5_CAEEL	46 kDa		1		1	4
	TRUE	Empty	Peroxisomal catalase 1 OS=Caenorhabditis elegans OX=6239 GN=ctl-2 PE=2 SV=3	Q27487|CATA1_CAEEL	57 kDa	TRUE	3		0	1
	TRUE	Empty	Endoplasmic reticulum resident protein 44.2 OS=Caenorhabditis elegans OX=6239 GN=erp-44.2 PE=1 SV=2	Q17688|ER442_CAEEL	47 kDa		1		2	7
	TRUE	Empty	Thymidylate kinase OS=Caenorhabditis elegans OX=6239 GN=dtmk-1 PE=3 SV=1	Q22018|KTHY_CAEEL	24 kDa		0		1	3
	TRUE	Empty	Modifier of cell death OS=Caenorhabditis elegans OX=6239 GN=mcd-1 PE=1 SV=1	B7FAS0|MCD1_CAEEL	103 kDa		2		0	3
	TRUE	Empty	tRNA (guanine(26)-N(2))-dimethyltransferase OS=Caenorhabditis elegans OX=6239 GN=trm-1 PE=1 SV=1	Q23270|TRM1_CAEEL	58 kDa		2		0	1
	TRUE	Empty	Cell division cycle protein 73 OS=Caenorhabditis elegans OX=6239 GN=cdc-73 PE=3 SV=4	Q9N5U5|CDC73_CAEEL	58 kDa		0		3	2
	TRUE	Empty	JmjC domain-containing histone demethylation protein 1 OS=Caenorhabditis elegans OX=6239 GN=jhdm-1 PE=3 SV=2	Q95Q98|JHD1_CAEEL	123 kDa		0		3	1
	TRUE	Empty	Glutathione reductase, mitochondrial OS=Caenorhabditis elegans OX=6239 GN=gsr-1 PE=1 SV=2	Q93379|GSHR_CAEEL	51 kDa		0		6	3
	TRUE	Empty	Aryl hydrocarbon receptor nuclear translocator homolog OS=Caenorhabditis elegans OX=6239 GN=aha-1 PE=1 SV=1	O02219|AHA1_CAEEL	51 kDa		3		0	3
	TRUE	Empty	Histone RNA hairpin-binding protein OS=Caenorhabditis elegans OX=6239 GN=cdl-1 PE=2 SV=1	Q09599|SLBP_CAEEL	41 kDa		0		8	1
	TRUE	Empty	DNA primase large subunit OS=Caenorhabditis elegans OX=6239 GN=pri-2 PE=3 SV=2	O02334|PRI2_CAEEL	58 kDa		0		6	0
	TRUE	Empty	G2/mitotic-specific cyclin-B3 OS=Caenorhabditis elegans OX=6239 GN=cyb-3 PE=2 SV=3	Q10654|CCNB3_CAEEL	45 kDa		0		10	0
	TRUE	Empty	Eukaryotic translation initiation factor 4E-4 OS=Caenorhabditis elegans OX=6239 GN=ife-4 PE=2 SV=1	Q22888|IF4E4_CAEEL	25 kDa		2		4	4
	TRUE	Empty	Odorant response abnormal protein 4 OS=Caenorhabditis elegans OX=6239 GN=odr-4 PE=1 SV=1	Q8I7F8|ODR4_CAEEL	54 kDa		2		3	3
	TRUE	Empty	Proteasome subunit beta type-1 OS=Caenorhabditis elegans OX=6239 GN=pbs-6 PE=1 SV=2	P34286|PSB1_CAEEL	29 kDa		2		5	2
	TRUE	Empty	Probable U6 snRNA-associated Sm-like protein LSm4 OS=Caenorhabditis elegans OX=6239 GN=lsm-4 PE=3 SV=1	Q19952|LSM4_CAEEL	14 kDa		2		5	3
	TRUE	Empty	Probable tyrosyl-DNA phosphodiesterase OS=Caenorhabditis elegans OX=6239 GN=F52C12.1 PE=3 SV=1	Q9TXV7|TYDP1_CAEEL	51 kDa		4		2	1
	TRUE	Empty	Probable NADH dehydrogenase [ubiquinone] iron-sulfur protein 8, mitochondrial OS=Caenorhabditis elegans OX=6239 GN=T20H4.5 PE=2 SV=1	Q22619|NDUS8_CAEEL	24 kDa		1		3	2
	TRUE	Empty	Peptidyl-prolyl cis-trans isomerase 10 OS=Caenorhabditis elegans OX=6239 GN=cyn-10 PE=2 SV=2	P52017|CYP10_CAEEL	18 kDa		1		1	3
	TRUE	Empty	Cell death abnormality protein 2 OS=Caenorhabditis elegans OX=6239 GN=ced-2 PE=1 SV=1	Q9NHC3|CED2_CAEEL	31 kDa		1		4	4
	TRUE	Empty	Probable pre-mRNA-splicing factor ATP-dependent RNA helicase mog-5 OS=Caenorhabditis elegans OX=6239 GN=mog-5 PE=1 SV=1	Q09530|MOG5_CAEEL	136 kDa	TRUE	1		2	3
	TRUE	Empty	Mediator of RNA polymerase II transcription subunit 18 OS=Caenorhabditis elegans OX=6239 GN=mdt-18 PE=3 SV=1	Q966M5|MED18_CAEEL	27 kDa		1		4	4
	TRUE	Empty	Troponin I 1 OS=Caenorhabditis elegans OX=6239 GN=tni-1 PE=2 SV=1	Q20334|TNNI1_CAEEL	29 kDa	TRUE	2		1	3
	TRUE	Empty	GPN-loop GTPase 1 OS=Caenorhabditis elegans OX=6239 GN=gop-2 PE=1 SV=1	P46577|GPN1_CAEEL	40 kDa		1		2	1
	TRUE	Empty	Cell death-related nuclease 4 OS=Caenorhabditis elegans OX=6239 GN=crn-4 PE=1 SV=1	Q10905|CRN4_CAEEL	35 kDa		2		2	1
	TRUE	Empty	Peptidyl-prolyl cis-trans isomerase 8 OS=Caenorhabditis elegans OX=6239 GN=cyn-8 PE=2 SV=1	P52016|CYP8_CAEEL	54 kDa		2		1	4
	TRUE	Empty	Serine/threonine-protein kinase sel-5 OS=Caenorhabditis elegans OX=6239 GN=sel-5 PE=2 SV=1	G5ECQ3|SEL5_CAEEL	120 kDa		0		2	2
	TRUE	Empty	Tyrosine-protein phosphatase cdc-14 OS=Caenorhabditis elegans OX=6239 GN=cdc-14 PE=1 SV=3	P81299|CDC14_CAEEL	80 kDa		2		1	1
	TRUE	Empty	Kinesin-like protein unc-104 OS=Caenorhabditis elegans OX=6239 GN=unc-104 PE=1 SV=4	P23678|UN104_CAEEL	180 kDa		2		1	1
	TRUE	Empty	MICOS complex subunit Mic10 OS=Caenorhabditis elegans OX=6239 GN=F54A3.5 PE=3 SV=2	Q9N4K0|MIC10_CAEEL	11 kDa		1		5	3
	TRUE	Empty	Guanine nucleotide-binding protein subunit beta-2 OS=Caenorhabditis elegans OX=6239 GN=gpb-2 PE=1 SV=2	Q20636|GBB2_CAEEL	39 kDa		5		0	5
	TRUE	Empty	Heat shock protein Hsp-12.2 OS=Caenorhabditis elegans OX=6239 GN=hsp-12.2 PE=3 SV=1	P34328|HSP10_CAEEL	12 kDa		6		0	4
	TRUE	Empty	Protein shank OS=Caenorhabditis elegans OX=6239 GN=shn-1 PE=1 SV=1	B7WN72|SHANK_CAEEL	126 kDa		0		1	2
	TRUE	Empty	GDP-L-fucose synthase OS=Caenorhabditis elegans OX=6239 GN=ger-1 PE=1 SV=1	G5EER4|FCL_CAEEL	36 kDa		3		0	3
	TRUE	Empty	Protein lin-28 OS=Caenorhabditis elegans OX=6239 GN=lin-28 PE=1 SV=1	P92186|LIN28_CAEEL	25 kDa		7		0	4
	TRUE	Empty	Putative deoxyribose-phosphate aldolase OS=Caenorhabditis elegans OX=6239 GN=F09E5.3 PE=3 SV=1	Q19264|DEOC_CAEEL	33 kDa		0		6	4
	TRUE	Empty	Innexin-12 OS=Caenorhabditis elegans OX=6239 GN=inx-12 PE=1 SV=1	O01634|INX12_CAEEL	47 kDa		3		0	5
	TRUE	Empty	Probable 4-aminobutyrate aminotransferase, mitochondrial OS=Caenorhabditis elegans OX=6239 GN=gta-1 PE=3 SV=1	Q21217|GABT_CAEEL	53 kDa		3		0	3
	TRUE	Empty	Papilin OS=Caenorhabditis elegans OX=6239 GN=mig-6 PE=1 SV=1	O76840|PPN1_CAEEL	238 kDa		1		0	3
	TRUE	Empty	Signal transducer and activator of transcription 1 OS=Caenorhabditis elegans OX=6239 GN=sta-1 PE=1 SV=2	Q9NAD6|STAT1_CAEEL	81 kDa		5		0	0
	TRUE	Empty	Proline dehydrogenase 1, mitochondrial OS=Caenorhabditis elegans OX=6239 GN=B0513.5 PE=3 SV=2	O45228|PROD_CAEEL	70 kDa		9		0	0
	TRUE	Empty	Bis(5'-nucleosyl)-tetraphosphatase [asymmetrical] OS=Caenorhabditis elegans OX=6239 GN=ndx-4 PE=1 SV=1	Q9U2M7|AP4A_CAEEL	16 kDa		3		3	4
	TRUE	Empty	Cytochrome c oxidase subunit 2 OS=Caenorhabditis elegans OX=6239 GN=ctc-2 PE=3 SV=2	P24894|COX2_CAEEL	27 kDa		2		2	3
	TRUE	Empty	Probable ATP synthase subunit g 1, mitochondrial OS=Caenorhabditis elegans OX=6239 GN=asg-1 PE=3 SV=1	P90921|ATPL1_CAEEL	15 kDa		2		5	4
	TRUE	Empty	Emerin homolog 1 OS=Caenorhabditis elegans OX=6239 GN=emr-1 PE=1 SV=1	O01971|EMR1_CAEEL	18 kDa		4		3	3
	TRUE	Empty	Probable small nuclear ribonucleoprotein Sm D2 OS=Caenorhabditis elegans OX=6239 GN=snr-4 PE=1 SV=1	Q18786|SMD2_CAEEL	13 kDa		2		3	4
	TRUE	Empty	NEDD8-activating enzyme E1 catalytic subunit OS=Caenorhabditis elegans OX=6239 GN=rfl-1 PE=1 SV=2	Q19360|UBA3_CAEEL	48 kDa		3		3	3
	TRUE	Empty	Small nuclear ribonucleoprotein Sm D3 OS=Caenorhabditis elegans OX=6239 GN=snr-1 PE=2 SV=2	Q17348|SMD3_CAEEL	15 kDa		2		2	3
	TRUE	Empty	Probable elongation factor 1-beta/1-delta 1 OS=Caenorhabditis elegans OX=6239 GN=eef-1B.1 PE=1 SV=1	P34460|EF1B1_CAEEL	23 kDa	TRUE	2		4	3
	TRUE	Empty	Probable 28S ribosomal protein S10, mitochondrial OS=Caenorhabditis elegans OX=6239 GN=mrps-10 PE=3 SV=1	Q9XWV5|RT10_CAEEL	18 kDa		1		4	3
	TRUE	Empty	Pre-rRNA-processing protein TSR1 homolog OS=Caenorhabditis elegans OX=6239 GN=tag-151 PE=3 SV=1	Q19329|TSR1_CAEEL	89 kDa		1		2	1
	TRUE	Empty	RNA polymerase II-associated factor 1 homolog OS=Caenorhabditis elegans OX=6239 GN=pafo-1 PE=2 SV=2	P90783|PAF1_CAEEL	50 kDa		2		2	1
	TRUE	Empty	Ras GTPase-activating protein gap-2 OS=Caenorhabditis elegans OX=6239 GN=gap-2 PE=2 SV=2	Q8MLZ5|GAP2_CAEEL	136 kDa		1		2	2
	TRUE	Empty	Xaa-Pro aminopeptidase app-1 OS=Caenorhabditis elegans OX=6239 GN=app-1 PE=1 SV=1	O44750|XPP_CAEEL	69 kDa		1		4	4
	TRUE	Empty	Spliceosome-associated protein CWC15 homolog OS=Caenorhabditis elegans OX=6239 GN=cwc-15 PE=3 SV=1	O45766|CWC15_CAEEL	26 kDa		1		3	3
	TRUE	Empty	Suppressor/enhancer of lin-12 protein 9 OS=Caenorhabditis elegans OX=6239 GN=sel-9 PE=1 SV=1	O17528|TMED2_CAEEL	23 kDa		1		5	3
	TRUE	Empty	Fatty-acid and retinol-binding protein 1 OS=Caenorhabditis elegans OX=6239 GN=far-1 PE=3 SV=1	P34382|FAR1_CAEEL	20 kDa		1		1	7
	TRUE	Empty	Tyrosine-protein kinase receptor cam-1 OS=Caenorhabditis elegans OX=6239 GN=cam-1 PE=1 SV=1	G5EGK5|CAM1_CAEEL	104 kDa		1		0	2
	TRUE	Empty	Myotubularin-related protein 6 OS=Caenorhabditis elegans OX=6239 GN=mtm-6 PE=1 SV=1	G5ED68|MTMR6_CAEEL	77 kDa		1		3	1
	TRUE	Empty	Regulator of microtubule dynamics protein 1 OS=Caenorhabditis elegans OX=6239 GN=rmd-1 PE=1 SV=2	P34560|RMD1_CAEEL	26 kDa		1	0	6	0
	TRUE	Empty	MAP kinase-activated protein kinase mak-2 OS=Caenorhabditis elegans OX=6239 GN=mak-2 PE=1 SV=2	Q965G5|MAK2_CAEEL	42 kDa		2		0	2
	TRUE	Empty	Yes-associated protein homolog 1 OS=Caenorhabditis elegans OX=6239 GN=yap-1 PE=1 SV=2	Q19404|YAP1_CAEEL	51 kDa		3		0	6
	TRUE	Empty	Probable NADH dehydrogenase [ubiquinone] 1 alpha subcomplex subunit 12 OS=Caenorhabditis elegans OX=6239 GN=Y94H6A.8 PE=3 SV=2	Q9N2W7|NDUAC_CAEEL	17 kDa		0		2	3
	TRUE	Empty	Probable glutathione S-transferase 5 OS=Caenorhabditis elegans OX=6239 GN=gst-5 PE=1 SV=1	Q09596|GST5_CAEEL	23 kDa		3		0	3
	TRUE	Empty	Probable 39S ribosomal protein L45, mitochondrial OS=Caenorhabditis elegans OX=6239 GN=mrpl-45 PE=3 SV=3	Q95Y71|RM45_CAEEL	41 kDa		0		3	4
	TRUE	Empty	Protein lin-10 OS=Caenorhabditis elegans OX=6239 GN=lin-10 PE=1 SV=1	O17583|LIN10_CAEEL	105 kDa		2		0	3
	TRUE	Empty	Ribosome biogenesis protein WDR12 homolog OS=Caenorhabditis elegans OX=6239 GN=wdr-12 PE=3 SV=1	P91343|WDR12_CAEEL	49 kDa		0		1	2
	TRUE	Empty	Uncharacterized protein C08B11.9 OS=Caenorhabditis elegans OX=6239 GN=C08B11.9 PE=2 SV=1	Q09227|YP89_CAEEL	22 kDa		0		2	0
	TRUE	Empty	Regulator of spindle assembly protein 2 OS=Caenorhabditis elegans OX=6239 GN=rsa-2 PE=1 SV=1	G5EFV3|RSA2_CAEEL	108 kDa		0		2	0
	TRUE	Empty	Anaphase-promoting complex subunit 2 OS=Caenorhabditis elegans OX=6239 GN=apc-2 PE=1 SV=3	P34514|ANC2_CAEEL	85 kDa		0		3	0
	TRUE	Empty	Tyrosine decarboxylase OS=Caenorhabditis elegans OX=6239 GN=tdc-1 PE=2 SV=1	Q95ZS2|TDC1_CAEEL	80 kDa		0		5	0
	TRUE	Empty	Aurora/IPL1-related protein kinase 2 OS=Caenorhabditis elegans OX=6239 GN=air-2 PE=1 SV=2	O01427|AIR2_CAEEL	35 kDa		0		7	0
	TRUE	Empty	Kinetochore protein Nuf2 homolog OS=Caenorhabditis elegans OX=6239 GN=him-10 PE=1 SV=1	Q21952|NUF2_CAEEL	57 kDa		0		7	0
	TRUE	Empty	Probable DNA polymerase epsilon subunit 2 OS=Caenorhabditis elegans OX=6239 GN=pole-2 PE=3 SV=2	Q19196|DPOE2_CAEEL	61 kDa		0		4	0
	TRUE	Empty	Defective in germ line development protein 3 OS=Caenorhabditis elegans OX=6239 GN=gld-3 PE=1 SV=2	Q95ZK7|GLD3_CAEEL	110 kDa		0		4	0
	TRUE	Empty	Adenylate kinase isoenzyme 6 homolog OS=Caenorhabditis elegans OX=6239 GN=E02H1.6 PE=1 SV=2	Q09527|KAD6_CAEEL	21 kDa		3		2	3
	TRUE	Empty	General transcription factor IIH subunit 2 OS=Caenorhabditis elegans OX=6239 GN=T16H12.4 PE=3 SV=3	P34567|TF2H2_CAEEL	42 kDa		2		4	2
	TRUE	Empty	5'-tyrosyl-DNA phosphodiesterase OS=Caenorhabditis elegans OX=6239 GN=Y63D3A.4 PE=1 SV=1	Q9XWG3|TYDP2_CAEEL	41 kDa		2		2	2
	TRUE	Empty	Calcium load-activated calcium channel homolog OS=Caenorhabditis elegans OX=6239 GN=F22B5.10 PE=3 SV=1	Q19714|TMCO1_CAEEL	21 kDa		3		3	2
	TRUE	Empty	Nuclear cap-binding protein subunit 2 OS=Caenorhabditis elegans OX=6239 GN=ncbp-2 PE=3 SV=2	Q93594|NCBP2_CAEEL	18 kDa		3		1	1
	TRUE	Empty	GTP exchange factor for ARFs 1 OS=Caenorhabditis elegans OX=6239 GN=grp-1 PE=3 SV=2	P34512|GRP1_CAEEL	45 kDa		1		1	2
	TRUE	Empty	Beta carbonic anhydrase 1 OS=Caenorhabditis elegans OX=6239 GN=bca-1 PE=3 SV=1	Q22460|BCA1_CAEEL	31 kDa		3		1	1
	TRUE	Empty	Mannose-P-dolichol utilization defect 1 protein homolog OS=Caenorhabditis elegans OX=6239 GN=F38E1.9 PE=3 SV=2	Q20157|MPU1_CAEEL	26 kDa		1		3	2
	TRUE	Empty	Q03560-DECOY	Q03560-DECOY	?		1		1	2
	TRUE	Empty	Surfeit locus protein 4 homolog OS=Caenorhabditis elegans OX=6239 GN=sft-4 PE=2 SV=1	Q18864|SURF4_CAEEL	32 kDa		3		1	1
	TRUE	Empty	Probable translation initiation factor eIF-2B subunit alpha OS=Caenorhabditis elegans OX=6239 GN=ZK1098.4 PE=1 SV=1	P34604|EI2BA_CAEEL	34 kDa		2		3	1
	TRUE	Empty	Protein unc-1 OS=Caenorhabditis elegans OX=6239 GN=unc-1 PE=3 SV=2	Q21190|UNC1_CAEEL	32 kDa	TRUE	3		0	1
	TRUE	Empty	Homeobox protein unc-62 OS=Caenorhabditis elegans OX=6239 GN=unc-62 PE=1 SV=1	Q9N5D6|UNC62_CAEEL	61 kDa		2		0	2
	TRUE	Empty	Vacuolar protein sorting-associated protein 28 homolog OS=Caenorhabditis elegans OX=6239 GN=vps-28 PE=1 SV=1	Q9NA26|VPS28_CAEEL	24 kDa		2		1	3
	TRUE	Empty	Bifunctional lysine-specific demethylase and histidyl-hydroxylase NO66 OS=Caenorhabditis elegans OX=6239 GN=jmjc-1 PE=3 SV=2	O01658|NO66_CAEEL	86 kDa		3		0	4
	TRUE	Empty	GLH-binding kinase 1 OS=Caenorhabditis elegans OX=6239 GN=kgb-1 PE=1 SV=2	O44408|KGB1_CAEEL	45 kDa		4		0	3
	TRUE	Empty	Putative 6-pyruvoyl tetrahydrobiopterin synthase OS=Caenorhabditis elegans OX=6239 GN=ptps-1 PE=1 SV=2	O02058|PTPS_CAEEL	16 kDa		3		0	4
	TRUE	Empty	Ribosomal RNA small subunit methyltransferase nep-1 OS=Caenorhabditis elegans OX=6239 GN=Y39A1A.14 PE=3 SV=1	Q9XX15|NEP1_CAEEL	26 kDa		2		0	4
	TRUE	Empty	Aspartate aminotransferase, cytoplasmic OS=Caenorhabditis elegans OX=6239 GN=got-1.2 PE=1 SV=1	Q22067|AATC_CAEEL	45 kDa		2		0	2
	TRUE	Empty	Esterase CM06B1 OS=Caenorhabditis elegans OX=6239 GN=F13H6.3 PE=3 SV=3	Q07085|EST2_CAEEL	62 kDa		2		0	2
	TRUE	Empty	Endoplasmic reticulum oxidoreductin-1 OS=Caenorhabditis elegans OX=6239 GN=ero-1 PE=3 SV=2	Q7YTU4|ERO1_CAEEL	55 kDa		2		0	5
	TRUE	Empty	Probable V-type proton ATPase 116 kDa subunit a OS=Caenorhabditis elegans OX=6239 GN=unc-32 PE=2 SV=3	P30628|VPP1_CAEEL	103 kDa		0		1	4
	TRUE	Empty	Protein phosphatase fem-2 OS=Caenorhabditis elegans OX=6239 GN=fem-2 PE=1 SV=2	P49594|FEM2_CAEEL	51 kDa		0		3	1
	TRUE	Empty	Origin recognition complex subunit 2 OS=Caenorhabditis elegans OX=6239 GN=orc-2 PE=2 SV=2	Q21037|ORC2_CAEEL	49 kDa		0		2	0
	TRUE	Empty	Girdin homolog OS=Caenorhabditis elegans OX=6239 GN=grdn-1 PE=1 SV=1	F3Y5P4|GRDN_CAEEL	154 kDa		0		0	3
	TRUE	Empty	Allophagy receptor allo-1 OS=Caenorhabditis elegans OX=6239 GN=allo-1 PE=1 SV=2	Q9U389|ALLO1_CAEEL	45 kDa		0		4	0
	TRUE	Empty	Spindle assembly abnormal protein 5 OS=Caenorhabditis elegans OX=6239 GN=sas-5 PE=1 SV=2	Q20010|SAS5_CAEEL	46 kDa		0		3	0
	TRUE	Empty	Mitochondrial import receptor subunit TOM22 homolog OS=Caenorhabditis elegans OX=6239 GN=tomm-22 PE=3 SV=1	O17287|TOM22_CAEEL	12 kDa		3		2	2
	TRUE	Empty	NTF2-related export protein OS=Caenorhabditis elegans OX=6239 GN=nxt-1 PE=1 SV=1	Q9U757|NXT1_CAEEL	15 kDa		3		2	2
	TRUE	Empty	C-type lectin domain-containing protein 88 OS=Caenorhabditis elegans OX=6239 GN=clec-88 PE=1 SV=1	Q86NG3|CLC88_CAEEL	26 kDa		2		3	2
	TRUE	Empty	Probable uridine-cytidine kinase OS=Caenorhabditis elegans OX=6239 GN=B0001.4 PE=3 SV=2	Q17413|UCK_CAEEL	28 kDa		2		2	2
	TRUE	Empty	DnaJ homolog dnj-20 OS=Caenorhabditis elegans OX=6239 GN=dnj-20 PE=3 SV=2	Q8MPX3|DNJ20_CAEEL	40 kDa		1		1	2
	TRUE	Empty	Fatty acid-binding protein homolog 1 OS=Caenorhabditis elegans OX=6239 GN=lbp-1 PE=2 SV=1	Q20223|FABP1_CAEEL	18 kDa		1		2	4
	TRUE	Empty	Serine/threonine-protein kinase/endoribonuclease ire-1 OS=Caenorhabditis elegans OX=6239 GN=ire-1 PE=1 SV=2	Q09499|IRE1_CAEEL	110 kDa		1		4	1
	TRUE	Empty	GrpE protein homolog, mitochondrial OS=Caenorhabditis elegans OX=6239 GN=C34C12.8 PE=3 SV=1	Q18421|GRPE_CAEEL	26 kDa		1		3	3
	TRUE	Empty	ER membrane protein complex subunit 7 homolog OS=Caenorhabditis elegans OX=6239 GN=C35D10.1 PE=3 SV=1	Q8WQG1|YLC1_CAEEL	25 kDa		1		1	3
	TRUE	Empty	Methylthioribose-1-phosphate isomerase OS=Caenorhabditis elegans OX=6239 GN=C01G10.9 PE=3 SV=1	Q93169|MTNA_CAEEL	41 kDa		5		1	1
	TRUE	Empty	Putative elongator complex protein 4 OS=Caenorhabditis elegans OX=6239 GN=elpc-4 PE=3 SV=1	Q18195|ELP4_CAEEL	38 kDa		1		5	1
	TRUE	Empty	ATP-dependent RNA helicase glh-3 OS=Caenorhabditis elegans OX=6239 GN=glh-3 PE=1 SV=1	O01836|GLH3_CAEEL	80 kDa	TRUE	1		3	2
	TRUE	Empty	Ataxin-2 homolog OS=Caenorhabditis elegans OX=6239 GN=atx-2 PE=1 SV=1	G5ED29|ATX2_CAEEL	106 kDa		1		2	2
	TRUE	Empty	Probable dynactin subunit 2 OS=Caenorhabditis elegans OX=6239 GN=dnc-2 PE=1 SV=1	Q09248|DCTN2_CAEEL	37 kDa		2		1	1
	TRUE	Empty	Serine/threonine-protein kinase spk-1 OS=Caenorhabditis elegans OX=6239 GN=spk-1 PE=2 SV=3	Q03563|SPK1_CAEEL	113 kDa		1		2	1
	TRUE	Empty	Zinc finger protein-like 1 homolog OS=Caenorhabditis elegans OX=6239 GN=Y45G12B.2 PE=3 SV=1	Q9N4Y9|ZFPL1_CAEEL	35 kDa		2		2	1
	TRUE	Empty	LAMP family protein lmp-1 OS=Caenorhabditis elegans OX=6239 GN=lmp-1 PE=2 SV=1	Q11117|LMP1_CAEEL	26 kDa		1		3	3
	TRUE	Empty	Putative zinc finger matrin-type protein snu-23 OS=Caenorhabditis elegans OX=6239 GN=snu-23 PE=3 SV=2	P34670|SNU23_CAEEL	25 kDa		3		0	2
	TRUE	Empty	Ras-related protein Rab-3 OS=Caenorhabditis elegans OX=6239 GN=rab-3 PE=1 SV=1	Q94986|RAB3_CAEEL	25 kDa	TRUE	5		1	0
	TRUE	Empty	Sister chromatid cohesion protein 1 OS=Caenorhabditis elegans OX=6239 GN=scc-1 PE=1 SV=1	Q19325|SCC1_CAEEL	73 kDa		1		6	0
	TRUE	Empty	Uncharacterized protein C44B7.5 OS=Caenorhabditis elegans OX=6239 GN=C44B7.5 PE=1 SV=1	Q18594|YC4B5_CAEEL	26 kDa		0		4	2
	TRUE	Empty	Mediator of RNA polymerase II transcription subunit 17 OS=Caenorhabditis elegans OX=6239 GN=mdt-17 PE=3 SV=4	Q9NAL4|MED17_CAEEL	77 kDa		2		3	0
	TRUE	Empty	Fructose-bisphosphate aldolase 1 OS=Caenorhabditis elegans OX=6239 GN=aldo-1 PE=1 SV=1	P54216|ALF1_CAEEL	39 kDa		2		0	3
	TRUE	Empty	Protein arginine N-methyltransferase 5 OS=Caenorhabditis elegans OX=6239 GN=prmt-5 PE=1 SV=2	P46580|ANM5_CAEEL	83 kDa		0		3	3
	TRUE	Empty	Probable peroxisomal acyl-coenzyme A oxidase 1.5 OS=Caenorhabditis elegans OX=6239 GN=acox-1.5 PE=3 SV=1	P34355|ACX15_CAEEL	75 kDa		4		0	1
	TRUE	Empty	Tyrosine-protein kinase receptor ver-3 OS=Caenorhabditis elegans OX=6239 GN=ver-3 PE=2 SV=1	Q21038|VER3_CAEEL	141 kDa		1		0	2
	TRUE	Empty	Arf-GAP with ANK repeat and PH domain-containing protein cnt-1 OS=Caenorhabditis elegans OX=6239 GN=cnt-1 PE=1 SV=2	Q9XXH8|CNT1_CAEEL	91 kDa		0		2	1
	TRUE	Empty	Probable cytosolic Fe-S cluster assembly factor oxy-4 OS=Caenorhabditis elegans OX=6239 GN=oxy-4 PE=1 SV=5	Q9N392|NARF_CAEEL	51 kDa		3		0	1
	TRUE	Empty	Inorganic pyrophosphatase 1 OS=Caenorhabditis elegans OX=6239 GN=pyp-1 PE=1 SV=5	Q18680|IPYR_CAEEL	46 kDa		0		1	4
	TRUE	Empty	Cyclin-dependent-like kinase 5 OS=Caenorhabditis elegans OX=6239 GN=cdk-5 PE=1 SV=1	G5ECH7|CDK5_CAEEL	33 kDa	TRUE	2		0	0
	TRUE	Empty	Uncharacterized protein EEED8.3 OS=Caenorhabditis elegans OX=6239 GN=EEED8.3 PE=3 SV=1	Q09294|YQO3_CAEEL	22 kDa		0		4	0
	TRUE	Empty	Zinc finger protein mex-6 OS=Caenorhabditis elegans OX=6239 GN=mex-6 PE=1 SV=3	Q09436|MEX6_CAEEL	52 kDa	TRUE	0		6	0
	TRUE	Empty	WD repeat-containing protein 20 homolog OS=Caenorhabditis elegans OX=6239 GN=wdr-20 PE=1 SV=1	D9N129|WDR20_CAEEL	84 kDa		2		2	2
	TRUE	Empty	Protein jagunal homolog OS=Caenorhabditis elegans OX=6239 GN=K05C4.2 PE=3 SV=1	Q9XUU9|JAGN_CAEEL	22 kDa		1		3	3
	TRUE	Empty	Mitochondrial import receptor subunit TOM20 homolog OS=Caenorhabditis elegans OX=6239 GN=tomm-20 PE=1 SV=1	Q19766|TOM20_CAEEL	20 kDa		2		2	1
	TRUE	Empty	Eukaryotic elongation factor 2 kinase OS=Caenorhabditis elegans OX=6239 GN=efk-1 PE=1 SV=1	O01991|EF2K_CAEEL	88 kDa		0		2	4
	TRUE	Empty	Mediator of RNA polymerase II transcription subunit 20 OS=Caenorhabditis elegans OX=6239 GN=mdt-20 PE=3 SV=2	Q9N5A1|MED20_CAEEL	22 kDa		1		2	2
	TRUE	Empty	Chromo domain-containing protein cec-3 OS=Caenorhabditis elegans OX=6239 GN=cec-3 PE=1 SV=1	P45968|CEC3_CAEEL	38 kDa		1		3	3
	TRUE	Empty	Protein lin-36 OS=Caenorhabditis elegans OX=6239 GN=lin-36 PE=1 SV=2	P34427|LIN36_CAEEL	108 kDa		2		1	2
	TRUE	Empty	Probable DNA-directed RNA polymerases I and III subunit RPAC2 OS=Caenorhabditis elegans OX=6239 GN=rpac-19 PE=3 SV=1	P34476|RPAC2_CAEEL	17 kDa		1		1	2
	TRUE	Empty	Brix domain-containing protein ZK795.3 OS=Caenorhabditis elegans OX=6239 GN=ZK795.3 PE=4 SV=1	O62518|YHPK_CAEEL	34 kDa		3		0	2
	TRUE	Empty	Metaxin-2 homolog OS=Caenorhabditis elegans OX=6239 GN=mtx-2 PE=2 SV=3	P34599|MTX2_CAEEL	26 kDa		1		1	2
	TRUE	Empty	Serpentine receptor class epsilon-21 OS=Caenorhabditis elegans OX=6239 GN=sre-21 PE=3 SV=2	O45306|SRE21_CAEEL	42 kDa		2		2	3
	TRUE	Empty	GILT-like protein F37H8.5 OS=Caenorhabditis elegans OX=6239 GN=F37H8.5 PE=1 SV=1	O17861|YVRI_CAEEL	31 kDa		1		2	2
	TRUE	Empty	Probable 40S ribosomal protein S14, mitochondrial OS=Caenorhabditis elegans OX=6239 GN=mrps-14 PE=3 SV=2	P49391|RT14_CAEEL	23 kDa		1		3	3
	TRUE	Empty	Q22505-DECOY	Q22505-DECOY	?		0		1	2
	TRUE	Empty	Mitochondrial sorting homolog OS=Caenorhabditis elegans OX=6239 GN=mspn-1 PE=3 SV=2	P54815|MSP1_CAEEL	38 kDa		0		1	2
	TRUE	Empty	Integrin alpha pat-2 OS=Caenorhabditis elegans OX=6239 GN=pat-2 PE=1 SV=1	P34446|PAT2_CAEEL	136 kDa		2		0	3
	TRUE	Empty	Mitochondrial import inner membrane translocase subunit TIM50 OS=Caenorhabditis elegans OX=6239 GN=scpl-4 PE=3 SV=1	Q22647|TIM50_CAEEL	51 kDa		0		3	1
	TRUE	Empty	Neuronal calcium sensor 2 OS=Caenorhabditis elegans OX=6239 GN=ncs-2 PE=2 SV=2	P36609|NCS2_CAEEL	22 kDa		3		0	3
	TRUE	Empty	Myosin regulatory light chain OS=Caenorhabditis elegans OX=6239 GN=mlc-4 PE=1 SV=1	Q09510|MLRH_CAEEL	20 kDa		0		3	3
	TRUE	Empty	Probable S-adenosylmethionine synthase 5 OS=Caenorhabditis elegans OX=6239 GN=sams-5 PE=3 SV=2	Q27522|METK5_CAEEL	44 kDa	TRUE	5		0	3
	TRUE	Empty	Ubiquilin OS=Caenorhabditis elegans OX=6239 GN=ubql-1 PE=2 SV=1	G5EFF7|UBQL_CAEEL	54 kDa		0		3	3
	TRUE	Empty	Uncharacterized peptidase C1-like protein F26E4.3 OS=Caenorhabditis elegans OX=6239 GN=F26E4.3 PE=1 SV=3	P90850|YCF2E_CAEEL	51 kDa		3		0	2
	TRUE	Empty	Probable dual specificity protein kinase madd-3 OS=Caenorhabditis elegans OX=6239 GN=madd-3 PE=1 SV=1	G5EDB2|MADD3_CAEEL	97 kDa		4		0	2
	TRUE	Empty	Putative pterin-4-alpha-carbinolamine dehydratase OS=Caenorhabditis elegans OX=6239 GN=pcbd-1 PE=3 SV=3	Q9TZH6|PHS_CAEEL	16 kDa		2		0	5
	TRUE	Empty	Conserved oligomeric Golgi complex subunit 8 OS=Caenorhabditis elegans OX=6239 GN=cogc-8 PE=3 SV=1	O44502|COG8_CAEEL	84 kDa		3		2	0
	TRUE	Empty	Amine oxidase family member 1 OS=Caenorhabditis elegans OX=6239 GN=amx-1 PE=3 SV=3	Q21988|AMX1_CAEEL	93 kDa		0		4	2
	TRUE	Empty	Apoptosis regulator ced-9 OS=Caenorhabditis elegans OX=6239 GN=ced-9 PE=1 SV=1	P41958|CED9_CAEEL	32 kDa		0		2	2
	TRUE	Empty	Uncharacterized protein K12H4.5 OS=Caenorhabditis elegans OX=6239 GN=K12H4.5 PE=4 SV=1	P34526|YM65_CAEEL	12 kDa		0		1	4
	TRUE	Empty	Putative glycerophosphocholine phosphodiesterase GPCPD1 homolog 2 OS=Caenorhabditis elegans OX=6239 GN=gpcp-2 PE=3 SV=1	Q10003|GPCP2_CAEEL	91 kDa		0		1	2
	TRUE	Empty	Dimethyladenosine transferase 1, mitochondrial OS=Caenorhabditis elegans OX=6239 GN=tfbm-1 PE=3 SV=2	P91424|TFB1M_CAEEL	42 kDa		4		0	1
	TRUE	Empty	Paxillin homolog 1 OS=Caenorhabditis elegans OX=6239 GN=pxl-1 PE=1 SV=2	Q09476|PXL1_CAEEL	46 kDa		4		0	1
	TRUE	Empty	Tyrosine-protein kinase csk-1 OS=Caenorhabditis elegans OX=6239 GN=csk-1 PE=1 SV=1	G5ECJ6|CSK1_CAEEL	60 kDa		3		0	1
	TRUE	Empty	Golgi apparatus protein 1 homolog OS=Caenorhabditis elegans OX=6239 GN=F14E5.2 PE=1 SV=1	Q19459|GSLG1_CAEEL	132 kDa		0		1	2
	TRUE	Empty	Choline kinase B2 OS=Caenorhabditis elegans OX=6239 GN=ckb-2 PE=1 SV=2	P46559|CKB2_CAEEL	42 kDa		2		2	0
	TRUE	Empty	Mitogen-activated protein kinase pmk-3 OS=Caenorhabditis elegans OX=6239 GN=pmk-3 PE=1 SV=2	O44514|PMK3_CAEEL	55 kDa		0		0	2
	TRUE	Empty	Ubiquinone biosynthesis protein coq-4, mitochondrial OS=Caenorhabditis elegans OX=6239 GN=coq-4 PE=3 SV=2	P91428|COQ4_CAEEL	26 kDa		0		2	1
	TRUE	Empty	Condensin-2 complex subunit kle-2 OS=Caenorhabditis elegans OX=6239 GN=kle-2 PE=1 SV=2	P34341|KLE2_CAEEL	94 kDa		0		3	0
	TRUE	Empty	Uncharacterized protein F55H2.7 OS=Caenorhabditis elegans OX=6239 GN=F55H2.7 PE=4 SV=3	P34467|YMF7_CAEEL	44 kDa		0		3	0
	TRUE	Empty	Uncharacterized protein F44E2.6 OS=Caenorhabditis elegans OX=6239 GN=F44E2.6 PE=3 SV=1	P34436|YL56_CAEEL	17 kDa		2		2	2
	TRUE	Empty	Ras-related protein Rab-6.1 OS=Caenorhabditis elegans OX=6239 GN=rab-6.1 PE=3 SV=1	P34213|RAB6A_CAEEL	23 kDa	TRUE	1		2	2
	TRUE	Empty	Trafficking protein particle complex subunit 3 homolog OS=Caenorhabditis elegans OX=6239 GN=trpp-3 PE=1 SV=1	P34605|TPPC3_CAEEL	20 kDa		2		1	2
	TRUE	Empty	Probable ribosome biogenesis protein RLP24 OS=Caenorhabditis elegans OX=6239 GN=rpl-24.2 PE=3 SV=1	Q17606|RLP24_CAEEL	19 kDa		2		1	3
	TRUE	Empty	Macoilin OS=Caenorhabditis elegans OX=6239 GN=maco-1 PE=2 SV=4	P91193|MACO1_CAEEL	101 kDa		2		1	2
	TRUE	Empty	GPI mannosyltransferase pigv-1 OS=Caenorhabditis elegans OX=6239 GN=pigv-1 PE=1 SV=1	O02164|PIGV1_CAEEL	78 kDa		1		4	1
	TRUE	Empty	Putative guanine nucleotide exchange factor MSS4 homolog OS=Caenorhabditis elegans OX=6239 GN=Y62E10A.11 PE=5 SV=1	Q9U1X4|MSS4_CAEEL	11 kDa		1		1	2
	TRUE	Empty	Zinc finger protein sdc-1 OS=Caenorhabditis elegans OX=6239 GN=sdc-1 PE=1 SV=2	P24349|SDC1_CAEEL	139 kDa		1		2	2
	TRUE	Empty	Eukaryotic translation initiation factor 6 OS=Caenorhabditis elegans OX=6239 GN=eif-6 PE=3 SV=1	O62106|IF6_CAEEL	26 kDa		1		3	1
	TRUE	Empty	RNA interference defective protein 10 OS=Caenorhabditis elegans OX=6239 GN=rde-10 PE=1 SV=1	Q9N3S2|RDE10_CAEEL	72 kDa		1		1	2
	TRUE	Empty	28S ribosomal protein S24, mitochondrial OS=Caenorhabditis elegans OX=6239 GN=mrps-24 PE=3 SV=1	Q688C0|RT24_CAEEL	19 kDa		1		2	2
	TRUE	Empty	Putative steroid dehydrogenase 1 OS=Caenorhabditis elegans OX=6239 GN=stdh-1 PE=3 SV=1	Q17703|STDH1_CAEEL	35 kDa	TRUE	2		2	1
	TRUE	Empty	Protein mago nashi homolog OS=Caenorhabditis elegans OX=6239 GN=mag-1 PE=1 SV=2	P49029|MGN_CAEEL	18 kDa		1		2	1
	TRUE	Empty	Aspartic protease 6 OS=Caenorhabditis elegans OX=6239 GN=asp-6 PE=1 SV=1	O01530|ASP6_CAEEL	42 kDa		3		1	2
	TRUE	Empty	P19826-DECOY	P19826-DECOY	?		2		1	0
	TRUE	Empty	Q05036-DECOY	Q05036-DECOY	?		2		0	0
	TRUE	Empty	Innexin-16 OS=Caenorhabditis elegans OX=6239 GN=inx-16 PE=3 SV=2	O61787|INX16_CAEEL	43 kDa		2		0	2
	TRUE	Empty	UBX domain-containing protein 4 OS=Caenorhabditis elegans OX=6239 GN=ubxn-4 PE=1 SV=1	P34631|UBXN4_CAEEL	52 kDa		0		1	3
	TRUE	Empty	CDK5RAP1-like protein OS=Caenorhabditis elegans OX=6239 GN=F25B5.5 PE=3 SV=1	Q09316|CK5P1_CAEEL	61 kDa		2		0	1
	TRUE	Empty	Peptide transporter family 1 OS=Caenorhabditis elegans OX=6239 GN=pept-1 PE=2 SV=2	Q21219|PEPT1_CAEEL	94 kDa		3		0	1
	TRUE	Empty	Lysine-specific demethylase 4 OS=Caenorhabditis elegans OX=6239 GN=jmjd-2 PE=3 SV=2	Q9U297|KDM4_CAEEL	106 kDa		3		1	0
	TRUE	Empty	Protein gfi-3 OS=Caenorhabditis elegans OX=6239 GN=gfi-3 PE=2 SV=1	Q93903|GFI3_CAEEL	92 kDa		0		2	1
	TRUE	Empty	Probable Hsp90 co-chaperone cdc37 OS=Caenorhabditis elegans OX=6239 GN=cdc-37 PE=1 SV=1	O02108|CDC37_CAEEL	43 kDa		0		3	1
	TRUE	Empty	Soluble NSF attachment protein 29 OS=Caenorhabditis elegans OX=6239 GN=snap-29 PE=3 SV=1	P83351|SNA29_CAEEL	31 kDa		0		3	1
	TRUE	Empty	Probable small nuclear ribonucleoprotein G OS=Caenorhabditis elegans OX=6239 GN=snr-7 PE=3 SV=1	Q9N4G9|RUXG_CAEEL	9 kDa		1		0	2
	TRUE	Empty	Calpain clp-1 OS=Caenorhabditis elegans OX=6239 GN=clp-1 PE=2 SV=4	P34308|CAN_CAEEL	84 kDa		3		0	1
	TRUE	Empty	Ribonuclease H2 subunit A OS=Caenorhabditis elegans OX=6239 GN=rnh-2 PE=2 SV=1	Q9U6P6|RNH2A_CAEEL	33 kDa		0		4	1
	TRUE	Empty	Serine/threonine-protein kinase VRK1 OS=Caenorhabditis elegans OX=6239 GN=vrk-1 PE=1 SV=1	Q19848|VRK1_CAEEL	67 kDa		1		2	0
	TRUE	Empty	4-hydroxyphenylpyruvate dioxygenase OS=Caenorhabditis elegans OX=6239 GN=hpd-1 PE=3 SV=1	Q22633|HPPD_CAEEL	44 kDa		1		0	2
	TRUE	Empty	Alpha,alpha-trehalose-phosphate synthase [UDP-forming] 1 OS=Caenorhabditis elegans OX=6239 GN=tps-1 PE=2 SV=1	Q7YZT6|TPS1_CAEEL	151 kDa		2	0	0	0
	TRUE	Empty	3-hydroxyanthranilate 3,4-dioxygenase OS=Caenorhabditis elegans OX=6239 GN=haao-1 PE=3 SV=2	Q19341|3HAO_CAEEL	32 kDa		2		0	1
	TRUE	Empty	Chromosomal passenger complex protein bir-1 OS=Caenorhabditis elegans OX=6239 GN=bir-1 PE=1 SV=1	G5EFA2|BIR1_CAEEL	18 kDa		0		4	1
	TRUE	Empty	Maternal embryonic leucine zipper kinase OS=Caenorhabditis elegans OX=6239 GN=pig-1 PE=1 SV=1	U4PR86|MELK_CAEEL	80 kDa		0		4	0
	TRUE	Empty	Tubulin polymerization-promoting protein homolog OS=Caenorhabditis elegans OX=6239 GN=tppp-1 PE=1 SV=1	P91127|TPPP_CAEEL	19 kDa		0		0	4
	TRUE	Empty	G-protein regulator 2 OS=Caenorhabditis elegans OX=6239 GN=gpr-2 PE=1 SV=1	Q03569|GPR2_CAEEL	60 kDa		0		3	0
	TRUE	Empty	CDK5RAP3-like protein OS=Caenorhabditis elegans OX=6239 GN=cdkr-3 PE=3 SV=1	Q9U2Y2|CK5P3_CAEEL	56 kDa		0		0	2
	TRUE	Empty	Branched-chain-amino-acid aminotransferase, cytosolic OS=Caenorhabditis elegans OX=6239 GN=bcat-1 PE=2 SV=2	P54688|BCAT_CAEEL	47 kDa		5		0	0
	TRUE	Empty	Transcriptional repressor NF-X1 homolog OS=Caenorhabditis elegans OX=6239 GN=nfx-1 PE=3 SV=1	Q18034|NFX1_CAEEL	125 kDa		0		4	0
	TRUE	Empty	Calcium/calmodulin-dependent protein kinase type 1 OS=Caenorhabditis elegans OX=6239 GN=cmk-1 PE=1 SV=1	Q9TXJ0|CMK1_CAEEL	39 kDa		3		0	0
	TRUE	Empty	Neprilysin-1 OS=Caenorhabditis elegans OX=6239 GN=nep-1 PE=1 SV=3	Q18673|NEPL1_CAEEL	87 kDa		0		0	3
	TRUE	Empty	Dendrite extension defective protein 1 OS=Caenorhabditis elegans OX=6239 GN=dex-1 PE=2 SV=2	P41950|DEX1_CAEEL	121 kDa		0		0	2
	TRUE	Empty	Q11183-DECOY	Q11183-DECOY	?		2		1	1
	TRUE	Empty	Putative pyridoxal kinase OS=Caenorhabditis elegans OX=6239 GN=pdxk-1 PE=3 SV=2	O01824|PDXK_CAEEL	36 kDa		1		1	2
	TRUE	Empty	Uncharacterized protein R144.12 OS=Caenorhabditis elegans OX=6239 GN=R144.12 PE=4 SV=1	Q629J5|YRRC_CAEEL	38 kDa		3		1	1
	TRUE	Empty	Mediator of RNA polymerase II transcription subunit 6 OS=Caenorhabditis elegans OX=6239 GN=mdt-6 PE=1 SV=1	Q9N337|MED6_CAEEL	29 kDa		1		3	1
	TRUE	Empty	Derlin-1 OS=Caenorhabditis elegans OX=6239 GN=cup-2 PE=2 SV=1	Q93561|DERL1_CAEEL	28 kDa		1		3	2
	TRUE	Empty	Matrix non-peptidase homolog 1 OS=Caenorhabditis elegans OX=6239 GN=mnp-1 PE=1 SV=1	P46557|MNP1_CAEEL	86 kDa		1		1	3
	TRUE	Empty	PITH domain-containing protein ZK353.9 OS=Caenorhabditis elegans OX=6239 GN=ZK353.9 PE=3 SV=1	Q95ZI6|PITH1_CAEEL	24 kDa		1		1	2
	TRUE	Empty	O61715-DECOY	O61715-DECOY	?		1		1	2
	TRUE	Empty	Homeobox protein ceh-38 OS=Caenorhabditis elegans OX=6239 GN=ceh-38 PE=2 SV=2	Q19720|HM38_CAEEL	71 kDa		2	0	0	1
	TRUE	Empty	Protein pelota homolog OS=Caenorhabditis elegans OX=6239 GN=pelo-1 PE=3 SV=1	P50444|PELO_CAEEL	43 kDa		2		1	3
	TRUE	Empty	Deoxyhypusine synthase OS=Caenorhabditis elegans OX=6239 GN=dhps-1 PE=1 SV=1	Q9XXJ0|DHYS_CAEEL	40 kDa		1		1	2
	TRUE	Empty	Transmembrane protein 33 homolog OS=Caenorhabditis elegans OX=6239 GN=npp-25 PE=3 SV=1	Q9XWV0|TMM33_CAEEL	30 kDa		0		2	2
	TRUE	Empty	Uncharacterized protein ZK177.8 OS=Caenorhabditis elegans OX=6239 GN=ZK177.8 PE=4 SV=2	Q09374|YS48_CAEEL	66 kDa		2		0	0
	TRUE	Empty	Probable 28S ribosomal protein S16, mitochondrial OS=Caenorhabditis elegans OX=6239 GN=mrps-16 PE=3 SV=2	Q10129|RT16_CAEEL	16 kDa		0		1	2
	TRUE	Empty	Tyrosine-protein phosphatase vhp-1 OS=Caenorhabditis elegans OX=6239 GN=vhp-1 PE=1 SV=2	Q10038|VHP1_CAEEL	71 kDa		3		0	3
	TRUE	Empty	Nicotinic receptor-associated protein 1 OS=Caenorhabditis elegans OX=6239 GN=nra-1 PE=1 SV=1	Q9XUB9|NRA1_CAEEL	71 kDa		0		2	2
	TRUE	Empty	Nuclear hormone receptor family member nhr-1 OS=Caenorhabditis elegans OX=6239 GN=nhr-1 PE=2 SV=4	Q21878|NHR1_CAEEL	51 kDa		2		0	2
	TRUE	Empty	Uncharacterized integrin beta-like protein C05D9.3 OS=Caenorhabditis elegans OX=6239 GN=C05D9.3 PE=1 SV=3	Q9GYK2|ITBL_CAEEL	46 kDa		1		0	2
	TRUE	Empty	Protein RER1 homolog OS=Caenorhabditis elegans OX=6239 GN=rer-1 PE=3 SV=1	P52879|RER1_CAEEL	23 kDa		0		3	1
	TRUE	Empty	Uncharacterized protein B0495.8 OS=Caenorhabditis elegans OX=6239 GN=B0495.8 PE=3 SV=1	Q09217|YP68_CAEEL	37 kDa		3		0	1
	TRUE	Empty	Copine family protein 5 OS=Caenorhabditis elegans OX=6239 GN=cpna-5 PE=3 SV=2	Q09219|CPNA5_CAEEL	82 kDa		3		0	1
	TRUE	Empty	NADH-ubiquinone oxidoreductase chain 5 OS=Caenorhabditis elegans OX=6239 GN=nduo-5 PE=3 SV=2	P24896|NU5M_CAEEL	61 kDa		0		2	1
	TRUE	Empty	Q23551-DECOY	Q23551-DECOY	?		2		0	0
	TRUE	Empty	SHC-transforming protein homolog 1 OS=Caenorhabditis elegans OX=6239 GN=shc-1 PE=1 SV=2	Q9TYT3|SHCH1_CAEEL	35 kDa		2		0	1
	TRUE	Empty	Regulation of longevity by E3 ubiquitin-protein ligase OS=Caenorhabditis elegans OX=6239 GN=rle-1 PE=1 SV=4	O45962|RLE1_CAEEL	105 kDa		3		0	0
	TRUE	Empty	Putative pyrroline-5-carboxylate reductase OS=Caenorhabditis elegans OX=6239 GN=F55G1.9 PE=3 SV=1	Q20848|P5CR_CAEEL	32 kDa		0		1	2
	TRUE	Empty	Probable DNA replication complex GINS protein PSF1 OS=Caenorhabditis elegans OX=6239 GN=psf-1 PE=3 SV=2	Q22019|PSF1_CAEEL	23 kDa		0		2	1
	TRUE	Empty	Uncharacterized protein ZK1098.2 OS=Caenorhabditis elegans OX=6239 GN=ZK1098.2 PE=4 SV=3	P34601|YO62_CAEEL	74 kDa		2		0	2
	TRUE	Empty	Aspartic protease 1 OS=Caenorhabditis elegans OX=6239 GN=asp-1 PE=1 SV=1	G5EEI4|ASP1_CAEEL	43 kDa		4		0	2
	TRUE	Empty	Acetoacetyl-CoA synthetase OS=Caenorhabditis elegans OX=6239 GN=sur-5 PE=2 SV=1	Q21166|SUR5_CAEEL	78 kDa		0		1	2
	TRUE	Empty	Phosphatidylinositol 3-kinase catalytic subunit type 3 OS=Caenorhabditis elegans OX=6239 GN=vps-34 PE=1 SV=1	Q9TXI7|PK3C3_CAEEL	103 kDa		0		2	0
	TRUE	Empty	Endoplasmic reticulum junction formation protein lunapark-1 OS=Caenorhabditis elegans OX=6239 GN=lnp-1 PE=2 SV=2	Q17667|LNP1_CAEEL	39 kDa		0		0	2
	TRUE	Empty	Ubiquitin-conjugating enzyme E2 25 OS=Caenorhabditis elegans OX=6239 GN=ubc-25 PE=2 SV=2	Q93571|UBC25_CAEEL	44 kDa		0		2	1
	TRUE	Empty	MOB-like protein phocein OS=Caenorhabditis elegans OX=6239 GN=mob-4 PE=3 SV=2	P34349|PHOCN_CAEEL	26 kDa		0		2	1
	TRUE	Empty	Uncharacterized sugar kinase R08D7.7 OS=Caenorhabditis elegans OX=6239 GN=R08D7.7 PE=3 SV=4	P30646|YNE7_CAEEL	59 kDa		2		0	0
	TRUE	Empty	Probable phytanoyl-CoA dioxygenase OS=Caenorhabditis elegans OX=6239 GN=ZK550.6 PE=3 SV=2	O62515|PAHX_CAEEL	36 kDa		3		0	0
	TRUE	Empty	Protein dct-6 OS=Caenorhabditis elegans OX=6239 GN=dct-6 PE=4 SV=2	Q09313|DCT6_CAEEL	104 kDa		3		0	0
	TRUE	Empty	Uncharacterized protein R09E10.5 OS=Caenorhabditis elegans OX=6239 GN=R09E10.5 PE=1 SV=2	Q21874|YF1M_CAEEL	163 kDa		0		0	2
	TRUE	Empty	Histone deacetylase 6 OS=Caenorhabditis elegans OX=6239 GN=hda-6 PE=3 SV=2	Q20296|HDA6_CAEEL	107 kDa		0		4	0
	TRUE	Empty	Collagen alpha-2(IV) chain OS=Caenorhabditis elegans OX=6239 GN=let-2 PE=1 SV=2	P17140|CO4A2_CAEEL	168 kDa		0		0	2
	TRUE	Empty	Uncharacterized protein ZK1098.3 OS=Caenorhabditis elegans OX=6239 GN=ZK1098.3 PE=4 SV=2	P34603|YO63_CAEEL	92 kDa		0		0	2
	TRUE	Empty	Cuticle collagen 1 OS=Caenorhabditis elegans OX=6239 GN=sqt-3 PE=1 SV=2	P08124|COL1_CAEEL	29 kDa		0		0	2
	TRUE	Empty	Probable-ribose 5-phosphate isomerase OS=Caenorhabditis elegans OX=6239 GN=rpia-1 PE=3 SV=1	P41994|RPIA_CAEEL	27 kDa		0		2	0
	TRUE	Empty	Kinetochore null protein 2 OS=Caenorhabditis elegans OX=6239 GN=knl-2 PE=1 SV=2	O44548|KNL2_CAEEL	101 kDa		0		2	0
	TRUE	Empty	Serine/threonine-protein phosphatase 2A regulatory subunit rsa-1 OS=Caenorhabditis elegans OX=6239 GN=rsa-1 PE=1 SV=2	O02217|P2R31_CAEEL	47 kDa		0		5	0
	TRUE	Empty	Pharynx and intestine in excess protein 1 OS=Caenorhabditis elegans OX=6239 GN=pie-1 PE=1 SV=1	Q94131|PIE1_CAEEL	38 kDa		0		4	0
	TRUE	Empty	Uncharacterized protein T05H10.4 OS=Caenorhabditis elegans OX=6239 GN=T05H10.4 PE=4 SV=1	Q09348|YRS4_CAEEL	49 kDa		0		5	0
	TRUE	Empty	Inhibitor of nuclear factor kappa-B kinase epsilon subunit homolog 1 OS=Caenorhabditis elegans OX=6239 GN=ikke-1 PE=1 SV=5	P32742|IKKE1_CAEEL	93 kDa		0		3	0
	TRUE	Empty	Conserved regulator of innate immunity protein 3 OS=Caenorhabditis elegans OX=6239 GN=cri-3 PE=1 SV=2	Q21018|CRI3_CAEEL	26 kDa		1		2	2
	TRUE	Empty	ATP-dependent Clp protease proteolytic subunit 1, mitochondrial OS=Caenorhabditis elegans OX=6239 GN=clpp-1 PE=1 SV=2	Q27539|CLPP1_CAEEL	24 kDa		2		1	1
	TRUE	Empty	Ubiquitin-fold modifier 1 OS=Caenorhabditis elegans OX=6239 GN=ufm-1 PE=1 SV=1	P34661|UFM1_CAEEL	10 kDa		1		1	3
	TRUE	Empty	Putative H/ACA ribonucleoprotein complex subunit 3 OS=Caenorhabditis elegans OX=6239 GN=nola-3 PE=3 SV=2	Q9XVR8|NOP10_CAEEL	8 kDa		1		1	2
	TRUE	Empty	Defective pharyngeal development protein 4 OS=Caenorhabditis elegans OX=6239 GN=pha-4 PE=1 SV=1	Q17381|PHA4_CAEEL	55 kDa		1		1	2
	TRUE	Empty	NHP2-like protein 1 homolog OS=Caenorhabditis elegans OX=6239 GN=M28.5 PE=3 SV=1	Q21568|NH2L1_CAEEL	14 kDa		2		1	1
	TRUE	Empty	Arrestin domain-containing protein 17 OS=Caenorhabditis elegans OX=6239 GN=arrd-17 PE=1 SV=2	O45782|ARD17_CAEEL	48 kDa		2		0	1
	TRUE	Empty	SPARC OS=Caenorhabditis elegans OX=6239 GN=ost-1 PE=1 SV=1	P34714|SPRC_CAEEL	30 kDa		1		0	2
	TRUE	Empty	Transcription factor lin-26 OS=Caenorhabditis elegans OX=6239 GN=lin-26 PE=1 SV=2	Q27355|LIN26_CAEEL	49 kDa		1		0	2
	TRUE	Empty	Protein FAM50 homolog OS=Caenorhabditis elegans OX=6239 GN=C47E8.4 PE=3 SV=3	Q18691|FAM50_CAEEL	38 kDa		0		2	2
	TRUE	Empty	Uncharacterized protein T20B12.3 OS=Caenorhabditis elegans OX=6239 GN=T20B12.3 PE=3 SV=1	P41843|YO93_CAEEL	59 kDa		2		0	3
	TRUE	Empty	Tyrosine-protein phosphatase 1 OS=Caenorhabditis elegans OX=6239 GN=ptp-1 PE=2 SV=3	P28191|PTP1_CAEEL	115 kDa		3		0	1
	TRUE	Empty	NADH dehydrogenase [ubiquinone] 1 beta subcomplex subunit 7 OS=Caenorhabditis elegans OX=6239 GN=D2030.4 PE=3 SV=1	P90789|NDUB7_CAEEL	14 kDa		0		2	1
	TRUE	Empty	Serine/threonine-protein kinase unc-51 OS=Caenorhabditis elegans OX=6239 GN=unc-51 PE=1 SV=1	Q23023|UNC51_CAEEL	95 kDa		1		0	2
	TRUE	Empty	Probable ADP-dependent glucokinase OS=Caenorhabditis elegans OX=6239 GN=C50D2.7 PE=1 SV=1	Q86S40|ADPGK_CAEEL	57 kDa		1		0	2
	TRUE	Empty	Orotate phosphoribosyltransferase OS=Caenorhabditis elegans OX=6239 GN=R12E2.11 PE=1 SV=1	O61790|PYRE_CAEEL	25 kDa		0		2	1
	TRUE	Empty	Protein pop-1 OS=Caenorhabditis elegans OX=6239 GN=pop-1 PE=1 SV=3	Q10666|POP1_CAEEL	49 kDa		0		2	1
	TRUE	Empty	Casein kinase II subunit beta OS=Caenorhabditis elegans OX=6239 GN=kin-10 PE=1 SV=2	P28548|CSK2B_CAEEL	26 kDa		0		2	1
	TRUE	Empty	Probable 39S ribosomal protein L49, mitochondrial OS=Caenorhabditis elegans OX=6239 GN=mrpl-49 PE=3 SV=2	Q21939|RM49_CAEEL	22 kDa		0		2	1
	TRUE	Empty	Polypeptide N-acetylgalactosaminyltransferase 3 OS=Caenorhabditis elegans OX=6239 GN=gly-3 PE=2 SV=2	P34678|GALT3_CAEEL	69 kDa		0		0	3
	TRUE	Empty	Guanine nucleotide-binding protein alpha-7 subunit OS=Caenorhabditis elegans OX=6239 GN=gpa-7 PE=1 SV=1	Q21917|GPA7_CAEEL	41 kDa	TRUE	3		0	1
	TRUE	Empty	Uncharacterized protein F13E6.1 OS=Caenorhabditis elegans OX=6239 GN=F13E6.1 PE=3 SV=2	P55326|YZG1_CAEEL	21 kDa		1		0	3
	TRUE	Empty	Peptidyl-prolyl cis-trans isomerase 6 OS=Caenorhabditis elegans OX=6239 GN=cyn-6 PE=2 SV=1	P52014|CYP6_CAEEL	22 kDa	TRUE	0		1	2
	TRUE	Empty	High mobility group protein 1.2 OS=Caenorhabditis elegans OX=6239 GN=hmg-1.2 PE=1 SV=2	Q09390|HMG12_CAEEL	27 kDa		0		0	2
	TRUE	Empty	Queuine tRNA-ribosyltransferase accessory subunit 2 OS=Caenorhabditis elegans OX=6239 GN=tgt-2 PE=3 SV=1	Q9NEU3|QTRT2_CAEEL	42 kDa		0		0	2
	TRUE	Empty	Uncharacterized protein B0303.7 OS=Caenorhabditis elegans OX=6239 GN=B0303.7 PE=1 SV=5	P34258|YKA7_CAEEL	53 kDa		3		0	0
	TRUE	Empty	Inositol monophosphatase ttx-7 OS=Caenorhabditis elegans OX=6239 GN=ttx-7 PE=1 SV=3	Q19420|IMPA1_CAEEL	31 kDa		0		0	2
	TRUE	Empty	Nuclear hormone receptor family member nhr-41 OS=Caenorhabditis elegans OX=6239 GN=nhr-41 PE=2 SV=4	Q9N4B8|NHR41_CAEEL	68 kDa		0		0	2
	TRUE	Empty	Insulin-like receptor OS=Caenorhabditis elegans OX=6239 GN=daf-2 PE=1 SV=2	Q968Y9|INSR_CAEEL	207 kDa		0		2	0
	TRUE	Empty	Protein lin-2 OS=Caenorhabditis elegans OX=6239 GN=lin-2 PE=1 SV=1	P54936|LIN2_CAEEL	109 kDa		2		0	0
	TRUE	Empty	P34501-DECOY	P34501-DECOY	?		0		2	0
	TRUE	Empty	Uncharacterized protein F44E2.8 OS=Caenorhabditis elegans OX=6239 GN=F44E2.8 PE=4 SV=2	P34438|YL58_CAEEL	27 kDa		0		2	0
	TRUE	Empty	Protein timeless homolog OS=Caenorhabditis elegans OX=6239 GN=tim-1 PE=1 SV=1	G5EDN3|TIM_CAEEL	157 kDa		0		3	0
	TRUE	Empty	Meiotic spindle formation protein mei-1 OS=Caenorhabditis elegans OX=6239 GN=mei-1 PE=1 SV=1	P34808|KTNA1_CAEEL	52 kDa		0		2	0
	TRUE	Empty	LIM domain-containing protein unc-95 OS=Caenorhabditis elegans OX=6239 GN=unc-95 PE=1 SV=2	Q9NEZ5|UNC95_CAEEL	40 kDa		3		0	0
	TRUE	Empty	Bifunctional arginine demethylase and lysyl-hydroxylase psr-1 OS=Caenorhabditis elegans OX=6239 GN=psr-1 PE=1 SV=2	Q9GYI4|JMJD6_CAEEL	47 kDa		0		3	0
	TRUE	Empty	Sterol 4-C-methyltransferase strm-1 OS=Caenorhabditis elegans OX=6239 GN=strm-1 PE=3 SV=2	Q9TYP1|STRM1_CAEEL	38 kDa		0		0	3
	TRUE	Empty	Histone-lysine N-methyltransferase mes-2 OS=Caenorhabditis elegans OX=6239 GN=mes-2 PE=1 SV=2	O17514|MES2_CAEEL	89 kDa		0		3	0
	TRUE	Empty	Poly [ADP-ribose] polymerase 2 OS=Caenorhabditis elegans OX=6239 GN=parp-2 PE=1 SV=1	Q09525|PARP2_CAEEL	61 kDa		0		3	0
	TRUE	Empty	Spindle-defective protein 2 OS=Caenorhabditis elegans OX=6239 GN=spd-2 PE=1 SV=1	P91870|SPD2_CAEEL	92 kDa		0		2	0
	TRUE	Empty	Putative carbonic anhydrase 3 OS=Caenorhabditis elegans OX=6239 GN=cah-3 PE=3 SV=1	Q27504|CAH3_CAEEL	28 kDa		3		0	0
	TRUE	Empty	UPF0046 protein C25E10.12 OS=Caenorhabditis elegans OX=6239 GN=C25E10.12 PE=3 SV=1	Q18161|YBPT_CAEEL	32 kDa		0		0	2
	TRUE	Empty	Uracil-DNA glycosylase OS=Caenorhabditis elegans OX=6239 GN=ung-1 PE=1 SV=1	Q9U221|UNG_CAEEL	32 kDa		0		2	0
	TRUE	Empty	Uncharacterized protein F09G8.7 OS=Caenorhabditis elegans OX=6239 GN=F09G8.7 PE=4 SV=1	P34392|YLS7_CAEEL	12 kDa		1		2	1
	TRUE	Empty	ATP synthase subunit a OS=Caenorhabditis elegans OX=6239 GN=atp-6 PE=3 SV=2	P24888|ATP6_CAEEL	23 kDa		1		2	1
	TRUE	Empty	Uncharacterized protein ZK1098.6 OS=Caenorhabditis elegans OX=6239 GN=ZK1098.6 PE=4 SV=2	P34606|YO66_CAEEL	31 kDa		1		0	2
	TRUE	Empty	V-type proton ATPase 16 kDa proteolipid subunit 1 OS=Caenorhabditis elegans OX=6239 GN=vha-1 PE=2 SV=1	Q21898|VATL1_CAEEL	17 kDa		2		0	2
	TRUE	Empty	Uncharacterized protein R166.3 OS=Caenorhabditis elegans OX=6239 GN=R166.3 PE=4 SV=1	Q22004|AMERL_CAEEL	23 kDa		2		0	2
	TRUE	Empty	Putative H/ACA ribonucleoprotein complex subunit 2-like protein OS=Caenorhabditis elegans OX=6239 GN=Y48A6B.3 PE=3 SV=1	Q9XXD4|NHP2_CAEEL	18 kDa		0		2	2
	TRUE	Empty	Facilitated glucose transporter protein 1 OS=Caenorhabditis elegans OX=6239 GN=fgt-1 PE=1 SV=2	O44827|FGT1_CAEEL	55 kDa		1		0	2
	TRUE	Empty	Uncharacterized oxidoreductase dhs-5 OS=Caenorhabditis elegans OX=6239 GN=dhs-5 PE=3 SV=2	Q10130|DHS5_CAEEL	42 kDa		1		0	2
	TRUE	Empty	Probable small nuclear ribonucleoprotein E OS=Caenorhabditis elegans OX=6239 GN=snr-6 PE=3 SV=1	Q9XTU6|RUXE_CAEEL	11 kDa		0		2	1
	TRUE	Empty	Profilin-3 OS=Caenorhabditis elegans OX=6239 GN=pfn-3 PE=2 SV=1	Q21193|PROF3_CAEEL	14 kDa		3		0	1
	TRUE	Empty	Uncharacterized protein K04H4.2 OS=Caenorhabditis elegans OX=6239 GN=K04H4.2 PE=3 SV=8	P34504|YMV2_CAEEL	153 kDa		1		0	2
	TRUE	Empty	Chromo domain-containing protein cec-4 OS=Caenorhabditis elegans OX=6239 GN=cec-4 PE=1 SV=1	Q19972|CEC4_CAEEL	31 kDa		1		0	2
	TRUE	Empty	Uncharacterized protein T05H10.3 OS=Caenorhabditis elegans OX=6239 GN=T05H10.3 PE=1 SV=1	Q09347|YRS3_CAEEL	18 kDa		1		0	2
	TRUE	Empty	Eukaryotic translation initiation factor 2-alpha kinase pek-1 OS=Caenorhabditis elegans OX=6239 GN=pek-1 PE=1 SV=2	Q19192|E2AKA_CAEEL	120 kDa		0		2	1
	TRUE	Empty	Abnormal cell migration protein 10 OS=Caenorhabditis elegans OX=6239 GN=mig-10 PE=1 SV=3	P34400|MIG10_CAEEL	88 kDa		2		0	0
	TRUE	Empty	Aspartic protease 3 OS=Caenorhabditis elegans OX=6239 GN=asp-3 PE=1 SV=3	P55956|ASP3_CAEEL	43 kDa		3		0	1
	TRUE	Empty	Probable nuclear transport factor 2 OS=Caenorhabditis elegans OX=6239 GN=ran-4 PE=3 SV=1	Q21735|NTF2_CAEEL	15 kDa		0		0	2
	TRUE	Empty	Partitioning defective protein 3 OS=Caenorhabditis elegans OX=6239 GN=par-3 PE=1 SV=1	Q17353|PAR3_CAEEL	149 kDa		0		2	1
	TRUE	Empty	Putative peroxisome assembly protein 12 OS=Caenorhabditis elegans OX=6239 GN=prx-12 PE=3 SV=1	Q19189|PEX12_CAEEL	41 kDa		2		0	0
	TRUE	Empty	Serine/threonine-protein kinase dkf-1 OS=Caenorhabditis elegans OX=6239 GN=dkf-1 PE=1 SV=1	Q9XUJ7|DKF1_CAEEL	81 kDa		2	0	0	0
	TRUE	Empty	Synaptogenesis protein syg-1 OS=Caenorhabditis elegans OX=6239 GN=syg-1 PE=1 SV=1	B1Q236|SYG1_CAEEL	81 kDa		0		0	2
	TRUE	Empty	Lissencephaly-1 homolog OS=Caenorhabditis elegans OX=6239 GN=lis-1 PE=1 SV=1	Q9NDC9|LIS1_CAEEL	46 kDa		0		2	0
	TRUE	Empty	UV-stimulated scaffold protein A homolog OS=Caenorhabditis elegans OX=6239 GN=uvs-1 PE=3 SV=1	Q23088|UVSSA_CAEEL	69 kDa		0		2	0
	TRUE	Empty	BRCA1-associated protein homolog 2 OS=Caenorhabditis elegans OX=6239 GN=brap-2 PE=4 SV=1	Q95QN6|BRAP2_CAEEL	67 kDa		0		2	0
	TRUE	Empty	G2/mitotic-specific cyclin-B1 OS=Caenorhabditis elegans OX=6239 GN=cyb-1 PE=1 SV=1	Q10653|CCNB1_CAEEL	41 kDa		0		2	0
	TRUE	Empty	Zinc finger protein mex-5 OS=Caenorhabditis elegans OX=6239 GN=mex-5 PE=1 SV=1	Q9XUB2|MEX5_CAEEL	53 kDa	TRUE	0		3	0
	TRUE	Empty	Dehydrogenase/reductase SDR family member 4 OS=Caenorhabditis elegans OX=6239 GN=dhrs-4 PE=1 SV=1	G5EGA6|DHRS4_CAEEL	28 kDa		2		0	0
	TRUE	Empty	Uncharacterized protein C16C10.3 OS=Caenorhabditis elegans OX=6239 GN=C16C10.3 PE=4 SV=1	Q09249|YQ53_CAEEL	117 kDa		0		3	0
	TRUE	Empty	Uncharacterized oxidoreductase dhs-27 OS=Caenorhabditis elegans OX=6239 GN=dhs-27 PE=3 SV=2	Q11177|DHS27_CAEEL	94 kDa		0		0	2
	TRUE	Empty	Neuroendocrine convertase 2 OS=Caenorhabditis elegans OX=6239 GN=egl-3 PE=1 SV=1	G5ECN9|NEC2_CAEEL	72 kDa		2		0	0
	TRUE	Empty	Trimeric intracellular cation channel type 1B.1 OS=Caenorhabditis elegans OX=6239 GN=tric-1B.1 PE=1 SV=2	Q9NA75|T38B1_CAEEL	33 kDa		1		0	2
	TRUE	Empty	Homeobox protein ceh-13 OS=Caenorhabditis elegans OX=6239 GN=ceh-13 PE=4 SV=2	P17488|HM13_CAEEL	23 kDa		0		1	2
	TRUE	Empty	26S proteasome non-ATPase regulatory subunit 8 OS=Caenorhabditis elegans OX=6239 GN=rpn-12 PE=3 SV=1	Q23449|PSMD8_CAEEL	29 kDa		0		2	1
	TRUE	Empty	Probable rho GDP-dissociation inhibitor OS=Caenorhabditis elegans OX=6239 GN=rhi-1 PE=3 SV=1	Q20496|GDIR_CAEEL	22 kDa		0		1	2
	TRUE	Empty	Probable NADH dehydrogenase [ubiquinone] 1 beta subcomplex subunit 2, mitochondrial OS=Caenorhabditis elegans OX=6239 GN=F44G4.2 PE=2 SV=1	Q20412|NDUB2_CAEEL	18 kDa		0		1	2
	TRUE	Empty	Calcipressin-like protein OS=Caenorhabditis elegans OX=6239 GN=rcan-1 PE=1 SV=2	P53806|RCANL_CAEEL	23 kDa		2		0	1
	TRUE	Empty	Ethanolamine-phosphate phospho-lyase homolog 1 OS=Caenorhabditis elegans OX=6239 GN=eppl-1 PE=3 SV=1	P91408|AGT2L_CAEEL	52 kDa		2		0	1
	TRUE	Empty	B7FAS6-DECOY	B7FAS6-DECOY	?		0		0	2
	TRUE	Empty	Glutathione peroxidase 1 OS=Caenorhabditis elegans OX=6239 GN=gpx-1 PE=3 SV=1	O02621|GPX1_CAEEL	18 kDa	TRUE	0		0	2
	TRUE	Empty	Probable V-type proton ATPase subunit G OS=Caenorhabditis elegans OX=6239 GN=vha-10 PE=3 SV=1	P91303|VATG_CAEEL	14 kDa		0		0	2
	TRUE	Empty	Syntrophin-1 OS=Caenorhabditis elegans OX=6239 GN=stn-1 PE=1 SV=1	Q93646|SNT1_CAEEL	49 kDa		2		0	0
	TRUE	Empty	Exocyst complex component 5 OS=Caenorhabditis elegans OX=6239 GN=sec-10 PE=3 SV=1	Q18406|EXOC5_CAEEL	76 kDa		2		0	0
	TRUE	Empty	BTB and MATH domain-containing protein 40 OS=Caenorhabditis elegans OX=6239 GN=bath-40 PE=1 SV=1	Q9NF14|BAT40_CAEEL	46 kDa		0		2	0
	TRUE	Empty	Putative UDP-glucuronosyltransferase ugt-46 OS=Caenorhabditis elegans OX=6239 GN=ugt-46 PE=1 SV=1	Q10941|UGT46_CAEEL	60 kDa		2		0	0
	TRUE	Empty	Inositol polyphosphate 5-phosphatase OS=Caenorhabditis elegans OX=6239 GN=cil-1 PE=1 SV=1	P34370|I5P2_CAEEL	45 kDa		2		0	0
	TRUE	Empty	Desumoylating isopeptidase 1 homolog OS=Caenorhabditis elegans OX=6239 GN=F36D4.5 PE=2 SV=1	H2KZK4|DESI1_CAEEL	36 kDa		0		2	0
	TRUE	Empty	Cyclin-dependent kinase 12 OS=Caenorhabditis elegans OX=6239 GN=cdk-12 PE=1 SV=4	P46551|CDK12_CAEEL	82 kDa		0		2	0
	TRUE	Empty	Adenosine deaminase-like protein OS=Caenorhabditis elegans OX=6239 GN=C44B7.12 PE=3 SV=2	Q8IG39|ADAL_CAEEL	45 kDa		0		2	0
	TRUE	Empty	Metaxin-1 homolog OS=Caenorhabditis elegans OX=6239 GN=mtx-1 PE=1 SV=1	O45503|MTX1_CAEEL	35 kDa		2		0	0
	TRUE	Empty	Innexin-5 OS=Caenorhabditis elegans OX=6239 GN=inx-5 PE=3 SV=2	Q23027|INX5_CAEEL	51 kDa		0		0	2
	TRUE	Empty	Protein smg-9 OS=Caenorhabditis elegans OX=6239 GN=smg-9 PE=1 SV=1	Q9XWJ1|SMG9_CAEEL	44 kDa		0		2	0
	TRUE	Empty	WD repeat-containing protein wdr-5.3 OS=Caenorhabditis elegans OX=6239 GN=wdr-5.3 PE=3 SV=1	Q23256|WDR53_CAEEL	54 kDa		0		2	0
	TRUE	Empty	V-type proton ATPase 16 kDa proteolipid subunit 2 OS=Caenorhabditis elegans OX=6239 GN=vha-2 PE=2 SV=1	C0HLB3|VATL2_CAEEL (+1)	16 kDa		0		0	2
	TRUE	Empty	Probable geranylgeranyl transferase type-2 subunit beta OS=Caenorhabditis elegans OX=6239 GN=ggtb-1 PE=3 SV=2	P41992|GGTB2_CAEEL	37 kDa		0		2	0
	TRUE	Empty	Protein dhs-3 OS=Caenorhabditis elegans OX=6239 GN=dhs-3 PE=1 SV=1	A5JYX5|DHS3_CAEEL	34 kDa		2		0	0
